# Supplementary material
Source: Royal Society of Chemistry journal article supplement (doi:10.1039/d5nr04532k)
Supplement: d5nr04532k2.xlsx [file d5nr04532k2.xlsx]

## Sheet: Si
This file contains the raw data (intensity as a function of kinetic energy) and the processed data (intensity as a function of binding energy, normalised when necessary), with each tab corresponding to a different material, arranged in the same order and labeled using the abbreviations listed in Table S1.
Supplementary Information for: X‑Ray Photoelectron Spectroscopy Analysis of Reference Compounds for Studying Rechargeable Li‑, Na‑, and K‑ion Batteries
C1s				Si1s
Raw data		Processed data		Raw data		Processed data
Kinetic energy / eV	Intensity / a.u.	Binding energy / eV	Intensity / a.u.	Kinetic energy / eV	Intensity / a.u.	Binding energy / eV	Intensity / a.u.
7639	11025.1	299.76	0	6089	23492.2	1849.76	0
7639.07	10725.9	299.685	-0.08236	6089.07	23630.3	1849.68	0.02449
7639.15	10771.9	299.61	-0.05322	6089.15	25004.9	1849.61	0.25003
7639.23	11116.7	299.535	0.07245	6089.23	25520.2	1849.54	0.33585
7639.3	11310.3	299.46	0.1492	6089.3	25748.4	1849.46	0.375
7639.38	10820	299.385	0.0048	6089.38	27031.6	1849.38	0.58569
7639.45	11032.4	299.31	0.0874	6089.45	26982.2	1849.31	0.57974
7639.52	10840.1	299.235	0.03905	6089.52	27659.5	1849.23	0.69194
7639.6	11552.6	299.16	0.28293	6089.6	29946.7	1849.16	1.0659
7639.68	11559	299.085	0.29841	6089.68	30877.5	1849.09	1.21935
7639.75	10994.6	299.01	0.12918	6089.75	31850.6	1849.01	1.37969
7639.82	11104	298.935	0.17748	6089.82	32123.8	1848.93	1.42628
7639.9	10842.2	298.86	0.10553	6089.9	33228.3	1848.86	1.60804
7639.98	11398.5	298.785	0.29767	6089.98	35051.7	1848.79	1.9067
7640.05	11290.1	298.71	0.27465	6090.05	36719.9	1848.71	2.18015
7640.12	11203.2	298.635	0.25826	6090.12	38848.9	1848.63	2.52856
7640.2	10717.5	298.56	0.1126	6090.2	40906	1848.56	2.86531
7640.27	10754.3	298.485	0.13537	6090.27	42807.8	1848.48	3.17686
7640.35	11354.8	298.41	0.3399	6090.35	45607.8	1848.41	3.63445
7640.43	11344.9	298.335	0.34673	6090.43	48152	1848.34	4.05051
7640.5	11275.1	298.26	0.33371	6090.5	49783.3	1848.26	4.31819
7640.57	11148.2	298.185	0.30175	6090.57	52156.5	1848.18	4.70654
7640.65	11402.4	298.11	0.39238	6090.65	55450.6	1848.11	5.24464
7640.73	11528.3	298.035	0.44103	6090.73	59909.8	1848.04	5.97222
7640.8	10793.5	297.96	0.21095	6090.8	64227.1	1847.96	6.67678
7640.88	10919.8	297.885	0.25848	6090.88	67982.4	1847.88	7.29001
7640.95	11210.1	297.81	0.35835	6090.95	70838.6	1847.81	7.75714
7641.02	10746	297.735	0.21369	6091.02	74696.4	1847.73	8.38715
7641.1	10970.5	297.66	0.29077	6091.1	78848	1847.66	9.065
7641.18	11478.1	297.585	0.4585	6091.18	82561.1	1847.59	9.67161
7641.25	11329.6	297.51	0.41332	6091.25	88221.7	1847.51	10.5949
7641.32	11272.1	297.435	0.39663	6091.32	91894.9	1847.43	11.1952
7641.4	11630.2	297.36	0.51325	6091.4	95030.2	1847.36	11.7081
7641.48	11924	297.285	0.60808	6091.48	99088.6	1847.29	12.3711
7641.55	10786.3	297.21	0.23918	6091.55	105457	1847.21	13.4098
7641.62	10456	297.135	0.13009	6091.62	110802	1847.13	14.2821
7641.7	10064.3	297.06	0	6091.7	113477	1847.06	14.7205
7641.77	10019.9	296.985	-0.01905	6091.77	114635	1846.98	14.9122
7641.85	11030.9	296.91	0.30182	6091.85	117911	1846.91	15.4485
7641.93	10668.4	296.835	0.17783	6091.93	122226	1846.84	16.1536
7642	10835.9	296.76	0.22417	6092	126738	1846.76	16.891
7642.07	11529.3	296.685	0.43967	6092.07	130764	1846.68	17.5495
7642.15	11564.8	296.61	0.44187	6092.15	132010	1846.61	17.756
7642.23	10670.9	296.535	0.1431	6092.23	132827	1846.54	17.8928
7642.3	10792.1	296.46	0.17187	6092.3	135342	1846.46	18.3059
7642.38	11482.9	296.385	0.38432	6092.38	139133	1846.38	18.9265
7642.45	11030.6	296.31	0.22708	6092.45	140641	1846.31	19.1759
7642.52	10787.1	296.235	0.13711	6092.52	139264	1846.23	18.9566
7642.6	11851	296.16	0.4696	6092.6	135782	1846.16	18.395
7642.68	11713.9	296.085	0.41396	6092.68	136923	1846.09	18.5852
7642.75	12027.4	296.01	0.50405	6092.75	139701	1846.01	19.0416
7642.82	11372.8	295.935	0.28153	6092.82	136827	1845.93	18.5792
7642.9	11423.2	295.86	0.28716	6092.9	135883	1845.86	18.4308
7642.98	11679.8	295.785	0.3599	6092.98	133322	1845.79	18.0195
7643.05	12049.6	295.71	0.46968	6093.05	129301	1845.71	17.3711
7643.12	12145.7	295.635	0.49147	6093.12	127390	1845.63	17.0657
7643.2	11823.4	295.56	0.37855	6093.2	123475	1845.56	16.4348
7643.27	11707.5	295.485	0.33279	6093.27	119233	1845.48	15.7506
7643.35	11620.1	295.41	0.29672	6093.35	116155	1845.41	15.256
7643.43	13046	295.335	0.75018	6093.43	111743	1845.34	14.5445
7643.5	13780.9	295.26	0.98078	6093.5	108151	1845.26	13.9666
7643.57	12783.3	295.185	0.65195	6093.57	104199	1845.18	13.3302
7643.65	12218.8	295.11	0.46351	6093.65	100545	1845.11	12.7423
7643.73	12276.1	295.035	0.47646	6093.73	96230.5	1845.04	12.0473
7643.8	11863.2	294.96	0.33793	6093.8	93971.6	1844.96	11.6866
7643.88	12275.7	294.885	0.46655	6093.88	92249.3	1844.88	11.4133
7643.95	12525.7	294.81	0.54311	6093.95	86468.9	1844.81	10.4803
7644.02	12737	294.735	0.60757	6094.02	81873	1844.73	9.74012
7644.1	12718.7	294.66	0.59825	6094.1	78948.4	1844.66	9.27177
7644.18	12938.9	294.585	0.66646	6094.18	76666.5	1844.59	8.90806
7644.25	12560	294.51	0.54144	6094.25	72690.2	1844.51	8.26903
7644.32	12966.8	294.435	0.67076	6094.32	68096.2	1844.43	7.52972
7644.4	13548.1	294.36	0.85688	6094.4	65186	1844.36	7.06434
7644.48	13468.6	294.285	0.82985	6094.48	63050.2	1844.29	6.72501
7644.55	13686.7	294.21	0.8994	6094.55	60772.4	1844.21	6.36275
7644.62	13689.7	294.135	0.89981	6094.62	57384.4	1844.13	5.82017
7644.7	13376.6	294.06	0.79846	6094.7	54464.9	1844.06	5.35392
7644.77	12921.9	293.985	0.65172	6094.77	54074.6	1843.98	5.29904
7644.85	12842	293.91	0.62651	6094.85	50961.6	1843.91	4.80168
7644.93	13168.9	293.835	0.73312	6094.93	48896.9	1843.84	4.47491
7645	13736.4	293.76	0.91785	6095	46688.3	1843.76	4.12494
7645.07	13334.7	293.685	0.78975	6095.07	44568	1843.68	3.7895
7645.15	13607.8	293.61	0.88007	6095.15	43241.9	1843.61	3.58335
7645.23	13713.8	293.535	0.91675	6095.23	41657.3	1843.54	3.33536
7645.3	14316.8	293.46	1.1144	6095.3	41297.6	1843.46	3.2867
7645.38	14449.6	293.385	1.16045	6095.38	41209.6	1843.38	3.28239
7645.45	13783.2	293.31	0.94853	6095.45	39680.5	1843.31	3.044
7645.52	13746.2	293.235	0.94039	6095.52	38349.2	1843.23	2.83793
7645.6	13657.9	293.16	0.91598	6095.6	38189.5	1843.16	2.82255
7645.68	13318.7	293.085	0.81082	6095.68	37535.6	1843.09	2.72703
7645.75	13680.5	293.01	0.93256	6095.75	36744.2	1843.01	2.60934
7645.82	14500.1	292.935	1.20252	6095.82	36709.2	1842.93	2.61482
7645.9	14224	292.86	1.11875	6095.9	36777.9	1842.86	2.63737
7645.98	14830.2	292.785	1.32038	6095.98	37066.9	1842.79	2.69595
7646.05	14938.7	292.71	1.36149	6096.05	38861.4	1842.71	2.99947
7646.12	14077.5	292.635	1.08953	6096.12	39648.9	1842.63	3.13951
7646.2	15023.5	292.56	1.4019	6096.2	40696	1842.56	3.32196
7646.27	15363.9	292.485	1.51885	6096.27	40289.5	1842.48	3.2683
7646.35	16182	292.41	1.79045	6096.35	41642.5	1842.41	3.50092
7646.43	16027.6	292.335	1.74806	6096.43	43180.2	1842.34	3.76377
7646.5	17061.6	292.26	2.09002	6096.5	45820.2	1842.26	4.20606
7646.57	17462.3	292.185	2.22761	6096.57	49512.2	1842.18	4.8196
7646.65	17811.6	292.11	2.34882	6096.65	51534.3	1842.11	5.16188
7646.73	18038.1	292.035	2.43061	6096.73	54730.2	1842.04	5.69522
7646.8	17449.5	291.96	2.24928	6096.8	57687.8	1841.96	6.19005
7646.88	17344.7	291.885	2.22455	6096.88	60508.7	1841.88	6.66289
7646.95	17540.8	291.81	2.29728	6096.95	64497.1	1841.81	7.32578
7647.02	18455.1	291.735	2.60241	6097.02	66719.3	1841.73	7.70175
7647.1	18761.8	291.66	2.71139	6097.1	71530.7	1841.66	8.4989
7647.18	17976.7	291.585	2.46779	6097.18	74075.4	1841.59	8.92779
7647.25	17949.9	291.51	2.46948	6097.25	75776.8	1841.51	9.21981
7647.32	18410.8	291.435	2.62901	6097.32	78530.8	1841.43	9.68321
7647.4	18179.4	291.36	2.56502	6097.4	81521.1	1841.36	10.1853
7647.48	17886.5	291.285	2.48138	6097.48	83411.5	1841.29	10.5088
7647.55	18052.5	291.21	2.54629	6097.55	86076.9	1841.21	10.9585
7647.62	18772.3	291.135	2.79038	6097.62	90462.7	1841.13	11.6882
7647.7	17715.5	291.06	2.4605	6097.7	93658	1841.06	12.2246
7647.77	17783.1	290.985	2.49422	6097.77	96087	1840.98	12.6367
7647.85	17979.7	290.91	2.56984	6097.85	100189	1840.91	13.321
7647.93	17495.6	290.835	2.42564	6097.93	104633	1840.84	14.0612
7648	19258.4	290.76	3.00779	6098	109049	1840.76	14.7972
7648.07	19619.6	290.685	3.13716	6098.07	114794	1840.68	15.7494
7648.15	18086	290.61	2.65435	6098.15	122777	1840.61	17.0657
7648.23	18047.8	290.535	2.65504	6098.23	127003	1840.54	17.7716
7648.3	17572.6	290.46	2.51462	6098.3	135469	1840.46	19.167
7648.38	17571.1	290.385	2.52749	6098.38	143965	1840.38	20.5676
7648.45	17831.9	290.31	2.62525	6098.45	147356	1840.31	21.1386
7648.52	18017.3	290.235	2.69887	6098.52	150475	1840.23	21.6654
7648.6	18527.2	290.16	2.87747	6098.6	150564	1840.16	21.7002
7648.68	18767.3	290.085	2.96902	6098.68	148164	1840.09	21.3304
7648.75	18013.1	290.01	2.73939	6098.75	138859	1840.01	19.8384
7648.82	17637.6	289.935	2.63231	6098.82	128080	1839.93	18.1069
7648.9	18055.8	289.86	2.78183	6098.9	117626	1839.86	16.4288
7648.98	18466.3	289.785	2.92905	6098.98	105873	1839.79	14.5395
7649.05	17809.2	289.71	2.73133	6099.05	93154.8	1839.71	12.4938
7649.12	16916	289.635	2.45745	6099.12	81347.1	1839.63	10.5963
7649.2	17541.3	289.56	2.67442	6099.2	71515.9	1839.56	9.02046
7649.27	17737.3	289.485	2.75279	6099.27	60619.4	1839.48	7.27175
7649.35	17588.7	289.41	2.71987	6099.35	53372.4	1839.41	6.11667
7649.43	17718.7	289.335	2.77712	6099.43	47700.7	1839.34	5.21801
7649.5	17370.6	289.26	2.67995	6099.5	39558.9	1839.26	3.91808
7649.57	17189	289.185	2.63667	6099.57	33907.6	1839.18	3.02336
7649.65	17065.9	289.11	2.61241	6099.65	29218.3	1839.11	2.28536
7649.73	17667.6	289.035	2.82249	6099.73	26801	1839.04	1.91704
7649.8	18095.5	288.96	2.97646	6099.8	24452.1	1838.96	1.56017
7649.88	17308.5	288.885	2.73786	6099.88	22027.7	1838.88	1.19134
7649.95	17135.4	288.81	2.69776	6099.95	20684	1838.81	0.99853
7650.02	17400.1	288.735	2.79922	6100.02	19111.9	1838.73	0.76893
7650.1	17407.3	288.66	2.81754	6100.1	17120	1838.66	0.47138
7650.18	16878.7	288.585	2.66274	6100.18	16182.7	1838.59	0.34564
7650.25	16769.3	288.51	2.64347	6100.25	15654.4	1838.51	0.28671
7650.32	18256	288.435	3.14007	6100.32	15794.5	1838.43	0.3368
7650.4	18710.2	288.36	3.30306	6100.4	14740.1	1838.36	0.19301
7650.48	17736.3	288.285	3.00456	6100.48	13853.7	1838.29	0.07688
7650.55	17427.8	288.21	2.92112	6100.55	13206.7	1838.21	0
7650.62	17976.1	288.135	3.11463	6100.62	13175.5	1838.13	0.02369
7650.7	18374.8	288.06	3.2598	6100.7	13328.9	1838.06	0.07828
7650.77	17840.9	287.985	3.10363	6100.77	12477.3	1837.98	-0.02906
7650.85	18075.1	287.91	3.19568	6100.85	12567.6	1837.91	0.01876
7650.93	18006.8	287.835	3.19003	6100.93	12096.3	1837.84	-0.02214
7651	19561.4	287.76	3.70885	6101	11993.5	1837.76	0
7651.07	19490.4	287.685	3.70229	6101.07	12645	1837.68	0.14798
7651.15	19899.6	287.61	3.85098	6101.15	11580.2	1837.61	0.01823
7651.23	20031.1	287.535	3.90988	6101.23	11207.4	1837.54	-7.58853e-05
7651.3	20574.1	287.46	4.10177	6101.3	11442.1	1837.46	0.07693
7651.38	21044.8	287.385	4.27029	6101.38	11176	1837.38	0.06668
7651.45	21836.7	287.31	4.54259	6101.45	10613.4	1837.31	0
7651.52	23082.1	287.235	4.96144	6101.52	10496.1	1837.23	-0.00391
7651.6	23975.4	287.16	5.26648	6101.6	10328.6	1837.16	-0.02317
7651.68	24488	287.085	5.44845	6101.68	10750.8	1837.09	0.04966
7651.75	26005.7	287.01	5.95521	6101.75	10633.6	1837.01	0.03445
7651.82	26069.5	286.935	5.99205	6101.82	10545.7	1836.93	0.02708
7651.9	27671.8	286.86	6.52607	6101.9	10296.9	1836.86	0
7651.98	28839.3	286.785	6.91953	6101.98	10412.7	1836.79	0.04095
7652.05	30616.3	286.71	7.50993	6102.05	9688.83	1836.71	-0.0483
7652.12	32208.9	286.635	8.04066	6102.12	9325.99	1836.63	-0.07611
7652.2	31870.2	286.56	7.94716	6102.2	9975.88	1836.56	0.05989
7652.27	31784.6	286.485	7.93542	6102.27	9942.61	1836.48	0.08042
7652.35	33530	286.41	8.51533	6102.35	9997.71	1836.41	0.10733
7652.43	35659.4	286.335	9.2193	6102.43	9745.58	1836.34	0.07304
7652.5	35788.6	286.26	9.27675	6102.5	10196.4	1836.26	0.14264
7652.57	37996.9	286.185	10.006	6102.57	10194.3	1836.18	0.13186
7652.65	39074.8	286.11	10.3699	6102.65	9804.96	1836.11	0.0551
7652.73	39472.9	286.035	10.514	6102.73	9417.35	1836.04	-0.0207
7652.8	41536.8	285.96	11.1963	6102.8	10086.3	1835.96	0.07798
7652.88	43800.2	285.885	11.9431	6102.88	10000.2	1835.88	0.05608
7652.95	43538.3	285.81	11.8735	6102.95	9523.45	1835.81	-0.02784
7653.02	45244.4	285.735	12.44	6103.02	9729.76	1835.73	0
7653.1	47997.9	285.66	13.3447
7653.18	49590.9	285.585	13.8743
7653.25	51854.7	285.51	14.6206
7653.32	55425.7	285.435	15.7892
7653.4	59034	285.36	16.9697
7653.48	67012.8	285.285	19.5626
7653.55	78769	285.21	23.376
7653.62	94708.6	285.135	28.5413
7653.7	116539	285.06	35.6102
7653.77	142501	284.985	44.0142
7653.85	171509	284.91	53.4023
7653.93	205306	284.835	64.3381
7654	238713	284.76	75.1476
7654.07	263369	284.685	83.1289
7654.15	272807	284.61	86.192
7654.23	265203	284.535	83.7471
7654.3	232253	284.46	73.111
7654.38	189338	284.385	59.2542
7654.45	141464	284.31	43.7945
7654.52	95698.1	284.235	29.016
7654.6	61858.2	284.16	18.0914
7654.68	38435.5	284.085	10.5333
7654.75	25523.9	284.01	6.37182
7654.82	17379.3	283.935	3.75075
7654.9	13411.6	283.86	2.4793
7654.98	11603.2	283.785	1.9055
7655.05	10208.6	283.71	1.46517
7655.12	9543.47	283.635	1.26035
7655.2	8673.18	283.56	0.989
7655.27	7735.16	283.485	0.69551
7655.35	7149.83	283.41	0.51576
7655.43	6642.02	283.335	0.36081
7655.5	6271.82	283.26	0.25007
7655.57	6454.43	283.185	0.31772
7655.65	6348.48	283.11	0.29186
7655.73	5954.78	283.035	0.17273
7655.8	6197.88	282.96	0.25912
7655.88	5794.3	282.885	0.13624
7655.95	5452.93	282.81	0.03318
7656.02	5464.85	282.735	0.04401
7656.1	5349.64	282.66	0.01346
7656.18	5362.49	282.585	0.024
7656.25	5253.73	282.51	-0.00506
7656.32	5208.87	282.435	-0.01378
7656.4	4645.15	282.36	-0.1905
7656.48	4501.6	282.285	-0.23172
7656.55	4530.88	282.21	-0.21734
7656.62	5313.52	282.135	0.04027
7656.7	4897.81	282.06	-0.08958
7656.77	4604.59	281.985	-0.18001
7656.85	4780.03	281.91	-0.1191
7656.93	5106.42	281.835	-0.00951
7657	5008.53	281.76	-0.03709
7657.07	5126.9	281.685	0.0052
7657.15	4669.53	281.61	-0.13857
7657.23	4570.58	281.535	-0.16646
7657.3	4785.82	281.46	-0.09274
7657.38	4959.25	281.385	-0.03241
7657.45	4700.66	281.31	-0.11156
7657.52	4360.21	281.235	-0.21699
7657.6	4551.48	281.16	-0.15037
7657.68	4860.9	281.085	-0.04531
7657.75	4778.71	281.01	-0.06654
7657.82	4738.23	280.935	-0.07397
7657.9	4841.95	280.86	-0.03446
7657.98	5155.49	280.785	0.07325
7658.05	5079.45	280.71	0.05547
7658.12	4621.9	280.635	-0.08516
7658.2	4685.33	280.56	-0.05694
7658.27	4774.4	280.485	-0.01991
7658.35	4740.78	280.41	-0.02198
7658.43	4779.8	280.335	0
7658.5	4937.09	280.26	0.06081
7658.57	4652.27	280.185	-0.02069
7658.65	4557.7	280.11	-0.04019
7658.73	4778.94	280.035	0.04284
7658.8	4854.9	279.96	0.07933
7658.88	5139.7	279.885	0.18367
7658.95	4790.2	279.81	0.08334
7659.02	4226.38	279.735	-0.086
7659.1	4421.48	279.66	-0.00986
7659.18	4513.55	279.585	0.03314
7659.25	4569.13	279.51	0.06446
7659.32	4454.01	279.435	0.04067
7659.4	4749.48	279.36	0.14957
7659.48	4519.86	279.285	0.08874
7659.55	4670.99	279.21	0.15086
7659.62	4746.32	279.135	0.18833
7659.7	4429.3	279.06	0.09881
7659.77	4721.47	278.985	0.20592
7659.85	4701.28	278.91	0.21179
7659.93	4359.32	278.835	0.11331
7660	4858.88	278.76	0.28639
7660.07	4589.92	278.685	0.21065
7660.15	4818.68	278.61	0.29526
7660.23	4419.37	278.535	0.17633
7660.3	4865.04	278.46	0.32989
7660.38	4467.48	278.385	0.21027
7660.45	4352.19	278.31	0.18116
7660.52	4623.69	278.235	0.2763
7660.6	4879.35	278.16	0.36551
7660.68	4309.82	278.085	0.18719
7660.75	4234.56	278.01	0.16769
7660.82	4140.02	277.935	0.14106
7660.9	4463.08	277.86	0.2485
7660.98	4309.43	277.785	0.20102
7661.05	4527.55	277.71	0.27284
7661.12	4290.9	277.635	0.19688
7661.2	4471.94	277.56	0.2551
7661.27	4477.03	277.485	0.25569
7661.35	4675.19	277.41	0.31791
7661.43	4633.2	277.335	0.30178
7661.5	4819.3	277.26	0.35865
7661.57	5025.27	277.185	0.42125
7661.65	4906.35	277.11	0.37818
7661.73	4844.93	277.035	0.35305
7661.8	4616.22	276.96	0.27321
7661.88	4678.68	276.885	0.28687
7661.95	4790.89	276.81	0.31601
7662.02	4461.67	276.735	0.20193
7662.1	4362.11	276.66	0.16152
7662.18	4794.31	276.585	0.29244
7662.25	4747.31	276.51	0.26799
7662.32	4387.05	276.435	0.14182
7662.4	4431.28	276.36	0.1459
7662.48	4476.39	276.285	0.14983
7662.55	4539.31	276.21	0.15909
7662.62	4487.62	276.135	0.13092
7662.7	4859.71	276.06	0.23932
7662.77	4702.93	275.985	0.17644
7662.85	4915.39	275.91	0.23256
7662.93	4840.41	275.835	0.19547
7663	4522.87	275.76	0.0797
7663.07	4680.22	275.685	0.11712
7663.15	4813.11	275.61	0.14639
7663.23	4822.03	275.535	0.13537
7663.3	4975.91	275.46	0.17097
7663.38	4890.24	275.385	0.12898
7663.45	4657	275.31	0.03913
7663.52	4355.62	275.235	-0.0729
7663.6	4406.5	275.16	-0.0712
7663.68	4642.83	275.085	-0.00969
7663.75	4647.23	275.01	-0.0232
7663.82	4494.25	274.935	-0.08764
7663.9	4608.03	274.86	-0.06592
7663.98	4858.62	274.785	0

## Sheet: SiO
This file contains the raw data (intensity as a function of kinetic energy) and the processed data (intensity as a function of binding energy, normalised when necessary), with each tab corresponding to a different material, arranged in the same order and labeled using the abbreviations listed in Table S1.
Supplementary Information for: X‑Ray Photoelectron Spectroscopy Analysis of Reference Compounds for Studying Rechargeable Li‑, Na‑, and K‑ion Batteries
C1s				Si1s
Raw data		Processed data		Raw data		Processed data
Kinetic energy / eV	Intensity / a.u.	Binding energy / eV	Intensity / a.u.	Kinetic energy / eV	Intensity / a.u.	Binding energy / eV	Intensity / a.u.
7639	11277.7	300	1.07318	6089	60549.2	1850	-0.0629
7639.05	11289.1	299.95	1.08574	6089.05	60424.9	1849.95	-0.0867
7639.1	11264.7	299.9	1.06661	6089.1	61221.6	1849.9	-0.0475
7639.15	10559.9	299.85	0.44638	6089.15	62140.3	1849.85	0
7639.2	10399.6	299.8	0.30727	6089.2	62010	1849.8	-0.02442
7639.25	10089.5	299.75	0.03581	6089.25	60617.1	1849.75	-0.13534
7639.3	10046.2	299.7	0	6089.3	60440	1849.7	-0.16277
7639.35	10468.2	299.65	0.37533	6089.35	61834.4	1849.65	-0.08224
7639.4	11051.5	299.6	0.89318	6089.4	62434.9	1849.6	-0.05587
7639.45	11147	299.55	0.98002	6089.45	61825.9	1849.55	-0.1121
7639.5	11183.8	299.5	1.01503	6089.5	62079.6	1849.5	-0.10877
7639.55	10754.9	299.45	0.63858	6089.55	62840.4	1849.45	-0.07019
7639.6	10270.8	299.4	0.21326	6089.6	63654.8	1849.4	-0.02739
7639.65	10594.8	299.35	0.50194	6089.65	64354.6	1849.35	0.00816
7639.7	10887.9	299.3	0.76322	6089.7	64406.9	1849.3	0
7639.75	10592.7	299.25	0.50469	6089.75	64037.9	1849.25	-0.03633
7639.8	10270.4	299.2	0.22223	6089.8	63970.3	1849.2	-0.0513
7639.85	10142	299.15	0.11096	6089.85	64463.9	1849.15	-0.02717
7639.9	10099.1	299.1	0.07515	6089.9	64441.5	1849.1	-0.03787
7639.95	10175.5	299.05	0.14474	6089.95	65122.7	1849.05	0.000180923
7640	10468.6	299	0.40569	6090	66862	1849	0.11122
7640.05	10287.4	298.95	0.24744	6090.05	65925.2	1848.95	0.03915
7640.1	9724.93	298.9	-0.24764	6090.1	63963.6	1848.9	-0.10287
7640.15	9521.84	298.85	-0.42533	6090.15	64491.9	1848.85	-0.07388
7640.2	9855.82	298.8	-0.12865	6090.2	65794.7	1848.8	0.00849
7640.25	10616.2	298.75	0.54466	6090.25	67142.4	1848.75	0.09424
7640.3	10718.1	298.7	0.63609	6090.3	68685.7	1848.7	0.19369
7640.35	10577.1	298.65	0.5128	6090.35	69032.5	1848.65	0.21138
7640.4	10480	298.6	0.42825	6090.4	69140.3	1848.6	0.21298
7640.45	10238.1	298.55	0.21553	6090.45	69036.8	1848.55	0.20036
7640.5	10075.2	298.5	0.07259	6090.5	68958	1848.5	0.18972
7640.55	10524.2	298.45	0.47007	6090.55	70401.5	1848.45	0.28375
7640.6	10690.2	298.4	0.61734	6090.6	71003.5	1848.4	0.32036
7640.65	10395.8	298.35	0.35768	6090.65	70939.7	1848.35	0.31159
7640.7	10399.5	298.3	0.36132	6090.7	72425.4	1848.3	0.40934
7640.75	10634.5	298.25	0.5691	6090.75	74258.9	1848.25	0.53122
7640.8	10649	298.2	0.58198	6090.8	74937.1	1848.2	0.57416
7640.85	10319.6	298.15	0.29073	6090.85	75706.4	1848.15	0.62362
7640.9	10037.4	298.1	0.04116	6090.9	77220.5	1848.1	0.72443
7640.95	10353.2	298.05	0.31959	6090.95	78049.7	1848.05	0.77854
7641	10699.2	298	0.62453	6091	76978.3	1848	0.70262
7641.05	10616.7	297.95	0.55072	6091.05	76264	1847.95	0.65145
7641.1	10355.6	297.9	0.31893	6091.1	76996.2	1847.9	0.69973
7641.15	9962.38	297.85	-0.0298	6091.15	79375.1	1847.85	0.86118
7641.2	9874.27	297.8	-0.10925	6091.2	82280.7	1847.8	1.05901
7641.25	9610.17	297.75	-0.34443	6091.25	83482.8	1847.75	1.14031
7641.3	9934.87	297.7	-0.0597	6091.3	85393.6	1847.7	1.27046
7641.35	10500.1	297.65	0.43725	6091.35	86979	1847.65	1.37857
7641.4	10003.2	297.6	-0.00444	6091.4	89129.4	1847.6	1.52568
7641.45	9732.08	297.55	-0.24704	6091.45	91655.1	1847.55	1.69879
7641.5	9596.89	297.5	-0.36985	6091.5	93378.2	1847.5	1.81712
7641.55	10048	297.45	0.02498	6091.55	94606.5	1847.45	1.90179
7641.6	10403.2	297.4	0.33471	6091.6	95664.4	1847.4	1.97503
7641.65	10048.5	297.35	0.0169	6091.65	97471.5	1847.35	2.0999
7641.7	10183.1	297.3	0.13101	6091.7	101813	1847.3	2.3988
7641.75	10605.4	297.25	0.49885	6091.75	107295	1847.25	2.77614
7641.8	10758.2	297.2	0.62822	6091.8	109341	1847.2	2.91816
7641.85	10572	297.15	0.45767	6091.85	108697	1847.15	2.87596
7641.9	10950.5	297.1	0.78557	6091.9	109767	1847.1	2.95158
7641.95	10920.7	297.05	0.75225	6091.95	112315	1847.05	3.12879
7642	10403.3	297	0.28778	6092	116720	1847	3.43351
7642.05	10086.6	296.95	0	6092.05	120906	1846.95	3.72356
7642.1	10041	296.9	-0.04863	6092.1	124938	1846.9	4.00322
7642.15	10362	296.85	0.22603	6092.15	128026	1846.85	4.21845
7642.2	10459.5	296.8	0.3028	6092.2	130687	1846.8	4.40459
7642.25	10436	296.75	0.27223	6092.25	135030	1846.75	4.70636
7642.3	10723.4	296.7	0.51596	6092.3	140434	1846.7	5.08109
7642.35	10464.6	296.65	0.27663	6092.35	146972	1846.65	5.53383
7642.4	10456.1	296.6	0.25815	6092.4	153131	1846.6	5.9608
7642.45	10464.3	296.55	0.25394	6092.45	158170	1846.55	6.31122
7642.5	10107.8	296.5	-0.07281	6092.5	163346	1846.5	6.6713
7642.55	9936.51	296.45	-0.23624	6092.55	168758	1846.45	7.04778
7642.6	10303.8	296.4	0.07581	6092.6	173635	1846.4	7.38781
7642.65	10506.8	296.35	0.24243	6092.65	179478	1846.35	7.79431
7642.7	10403.2	296.3	0.13782	6092.7	185907	1846.3	8.24122
7642.75	10293.6	296.25	0.02767	6092.75	195766	1846.25	8.92354
7642.8	10482.9	296.2	0.1814	6092.8	206089	1846.2	9.63794
7642.85	10297.8	296.15	0.00406	6092.85	212744	1846.15	10.101
7642.9	10395.8	296.1	0.07662	6092.9	220831	1846.1	10.6626
7642.95	10384.2	296.05	0.05218	6092.95	230248	1846.05	11.3155
7643	10111.7	296	-0.20305	6093	239550	1846	11.9608
7643.05	10410.8	295.95	0.04665	6093.05	248412	1845.95	12.5761
7643.1	10568.8	295.9	0.17152	6093.1	260049	1845.9	13.3819
7643.15	10421.1	295.85	0.02613	6093.15	273311	1845.85	14.2994
7643.2	10606.1	295.8	0.17463	6093.2	286450	1845.8	15.2087
7643.25	10283.5	295.75	-0.12551	6093.25	297655	1845.75	15.9855
7643.3	9908.54	295.7	-0.47189	6093.3	307004	1845.7	16.6354
7643.35	10616.8	295.65	0.13865	6093.35	320650	1845.65	17.5801
7643.4	11314.7	295.6	0.73991	6093.4	335498	1845.6	18.6075
7643.45	11062.3	295.55	0.5016	6093.45	345757	1845.55	19.3204
7643.5	10523.5	295.5	0.01034	6093.5	355571	1845.5	20.003
7643.55	10204.9	295.45	-0.28645	6093.55	368227	1845.45	20.8806
7643.6	10325.9	295.4	-0.19483	6093.6	382028	1845.4	21.837
7643.65	10519.2	295.35	-0.0393	6093.65	393569	1845.35	22.6387
7643.7	10581	295.3	4.23094e-05	6093.7	405328	1845.3	23.4555
7643.75	10528.5	295.25	-0.06138	6093.75	416386	1845.25	24.2244
7643.8	10612.5	295.2	-0.00219	6093.8	428238	1845.2	25.0481
7643.85	10690	295.15	0.05138	6093.85	443495	1845.15	26.1054
7643.9	10501.6	295.1	-0.12985	6093.9	453074	1845.1	26.7735
7643.95	10494.9	295.05	-0.15039	6093.95	460750	1845.05	27.3115
7644	10677.8	295	-0.00331	6094	468830	1845	27.8773
7644.05	10835.4	294.95	0.12164	6094.05	475051	1844.95	28.3158
7644.1	10825.4	294.9	0.09871	6094.1	480733	1844.9	28.7176
7644.15	10690.2	294.85	-0.03464	6094.15	485603	1844.85	29.0639
7644.2	10799.7	294.8	0.04845	6094.2	491014	1844.8	29.4476
7644.25	10962.8	294.75	0.17913	6094.25	492718	1844.75	29.5773
7644.3	11045.8	294.7	0.23938	6094.3	490950	1844.7	29.4691
7644.35	10884.3	294.65	0.08382	6094.35	486692	1844.65	29.1904
7644.4	10573.5	294.6	-0.20334	6094.4	481280	1844.6	28.8327
7644.45	10817.5	294.55	0	6094.45	475807	1844.55	28.4711
7644.5	10931.2	294.5	0.08859	6094.5	466571	1844.5	27.8516
7644.55	10574.5	294.45	-0.23809	6094.55	455308	1844.45	27.0934
7644.6	10671	294.4	-0.1641	6094.6	442956	1844.4	26.2607
7644.65	11293.7	294.35	0.37512	6094.65	429437	1844.35	25.3482
7644.7	11266.6	294.3	0.34058	6094.7	417880	1844.3	24.5704
7644.75	11121.6	294.25	0.20224	6094.75	405372	1844.25	23.7275
7644.8	10940	294.2	0.03194	6094.8	394059	1844.2	22.9668
7644.85	10600.9	294.15	-0.27725	6094.85	379813	1844.15	22.0052
7644.9	10566.9	294.1	-0.31659	6094.9	365717	1844.1	21.054
7644.95	10569.9	294.05	-0.32288	6094.95	353021	1844.05	20.199
7645	11004.2	294	0.05212	6095	338837	1844	19.2423
7645.05	11219	293.95	0.23357	6095.05	327355	1843.95	18.4708
7645.1	11652.3	293.9	0.60838	6095.1	315824	1843.9	17.6963
7645.15	11378.3	293.85	0.3586	6095.15	303695	1843.85	16.8809
7645.2	11123.1	293.8	0.12573	6095.2	293701	1843.8	16.2121
7645.25	11146.3	293.75	0.1392	6095.25	284186	1843.75	15.5763
7645.3	11388	293.7	0.34591	6095.3	275245	1843.7	14.9801
7645.35	11813.2	293.65	0.71512	6095.35	266615	1843.65	14.4053
7645.4	11685.4	293.6	0.59607	6095.4	256574	1843.6	13.734
7645.45	11499.6	293.55	0.426	6095.45	247684	1843.55	13.1418
7645.5	11423.8	293.5	0.35348	6095.5	239912	1843.5	12.6263
7645.55	11312.7	293.45	0.25009	6095.55	230594	1843.45	12.0051
7645.6	11197.2	293.4	0.14305	6095.6	224925	1843.4	11.6342
7645.65	10842.2	293.35	-0.17532	6095.65	219487	1843.35	11.2794
7645.7	10789	293.3	-0.22671	6095.7	212868	1843.3	10.8437
7645.75	10874.3	293.25	-0.15541	6095.75	204878	1843.25	10.3142
7645.8	11235.6	293.2	0.15992	6095.8	199116	1843.2	9.9376
7645.85	11604	293.15	0.48186	6095.85	194142	1843.15	9.61518
7645.9	11908.5	293.1	0.74761	6095.9	189974	1843.1	9.34823
7645.95	12418.4	293.05	1.19516	6095.95	184089	1843.05	8.96367
7646	11914.8	293	0.74757	6096	178165	1843	8.57663
7646.05	11184.9	292.95	0.10028	6096.05	173170	1842.95	8.2535
7646.1	11082.1	292.9	0.00735	6096.1	166452	1842.9	7.8123
7646.15	11702.5	292.85	0.55357	6096.15	159397	1842.85	7.34818
7646.2	12386.3	292.8	1.15609	6096.2	153729	1842.8	6.97931
7646.25	12036.6	292.75	0.84587	6096.25	147903	1842.75	6.59984
7646.3	11522.8	292.7	0.39089	6096.3	142916	1842.7	6.27793
7646.35	10832.1	292.65	-0.22016	6096.35	138461	1842.65	5.99272
7646.4	10777	292.6	-0.26936	6096.4	135304	1842.6	5.79666
7646.45	11525.3	292.55	0.39154	6096.45	133876	1842.55	5.7193
7646.5	12311.6	292.5	1.08618	6096.5	130648	1842.5	5.51867
7646.55	12393.9	292.45	1.15915	6096.55	127823	1842.45	5.3458
7646.6	12109.4	292.4	0.90829	6096.6	125428	1842.4	5.20257
7646.65	12263	292.35	1.04478	6096.65	123159	1842.35	5.06811
7646.7	12412.9	292.3	1.17822	6096.7	121516	1842.3	4.97675
7646.75	12339	292.25	1.11423	6096.75	119591	1842.25	4.86623
7646.8	12698.5	292.2	1.43336	6096.8	117708	1842.2	4.75866
7646.85	12604.8	292.15	1.35236	6096.85	116635	1842.15	4.70679
7646.9	12036.7	292.1	0.85252	6096.9	116201	1842.1	4.6989
7646.95	12488.4	292.05	1.25386	6096.95	116260	1842.05	4.72497
7647	12922.1	292	1.63948	6097	115991	1842	4.72859
7647.05	12785.3	291.95	1.52139	6097.05	116056	1841.95	4.75534
7647.1	12751.4	291.9	1.49448	6097.1	117156	1841.9	4.85316
7647.15	13392.9	291.85	2.0644	6097.15	117519	1841.85	4.90058
7647.2	13593.5	291.8	2.24511	6097.2	117219	1841.8	4.90269
7647.25	13413.8	291.75	2.09005	6097.25	117830	1841.75	4.9674
7647.3	12969.2	291.7	1.70112	6097.3	117778	1841.7	4.98676
7647.35	13210.4	291.65	1.91842	6097.35	119585	1841.65	5.13379
7647.4	13919.9	291.6	2.54959	6097.4	122285	1841.6	5.34209
7647.45	14242.4	291.55	2.83909	6097.45	124412	1841.55	5.51127
7647.5	14489.3	291.5	3.06207	6097.5	126712	1841.5	5.69241
7647.55	14425.7	291.45	3.01099	6097.55	129635	1841.45	5.91641
7647.6	14297.9	291.4	2.90328	6097.6	134190	1841.4	6.25244
7647.65	14561.6	291.35	3.14178	6097.65	137699	1841.35	6.51689
7647.7	14304.8	291.3	2.92063	6097.7	139512	1841.3	6.66513
7647.75	14705	291.25	3.28006	6097.75	141655	1841.25	6.83621
7647.8	15180.8	291.2	3.70653	6097.8	144261	1841.2	7.0391
7647.85	14662.1	291.15	3.2547	6097.85	147429	1841.15	7.28058
7647.9	14577.8	291.1	3.1867	6097.9	152442	1841.1	7.64875
7647.95	14937.1	291.05	3.5109	6097.95	155473	1841.05	7.88114
7648	15291.8	291	3.83122	6098	160247	1841	8.23317
7648.05	16060	290.95	4.5171	6098.05	167445	1840.95	8.75147
7648.1	16190	290.9	4.6393	6098.1	171527	1840.9	9.05628
7648.15	15986.8	290.85	4.46739	6098.15	177463	1840.85	9.4883
7648.2	15855.2	290.8	4.35882	6098.2	187488	1840.8	10.2008
7648.25	15740.5	290.75	4.26545	6098.25	193102	1840.75	10.611
7648.3	15715.6	290.7	4.25162	6098.3	197436	1840.7	10.9335
7648.35	15814.1	290.65	4.34698	6098.35	204307	1840.65	11.4301
7648.4	16040.2	290.6	4.55526	6098.4	215015	1840.6	12.1899
7648.45	15930.6	290.55	4.46714	6098.45	225489	1840.55	12.9337
7648.5	15979.1	290.5	4.51889	6098.5	234421	1840.5	13.5719
7648.55	15995.5	290.45	4.54251	6098.55	242094	1840.45	14.1239
7648.6	15781.2	290.4	4.36246	6098.6	248962	1840.4	14.6208
7648.65	15731.9	290.35	4.3283	6098.65	256546	1840.35	15.1669
7648.7	15294.4	290.3	3.95141	6098.7	262036	1840.3	15.5695
7648.75	14588.5	290.25	3.33763	6098.75	266005	1840.25	15.868
7648.8	14968.6	290.2	3.68343	6098.8	267062	1840.2	15.9669
7648.85	15325.9	290.15	4.00924	6098.85	262661	1840.15	15.6916
7648.9	14516.7	290.1	3.30464	6098.9	259024	1840.1	15.4689
7648.95	14574.4	290.05	3.36614	6098.95	253681	1840.05	15.1292
7649	15038.4	290	3.78666	6099	246388	1840	14.656
7649.05	14788.7	289.95	3.57695	6099.05	237235	1839.95	14.0553
7649.1	14327.8	289.9	3.18071	6099.1	225866	1839.9	13.3028
7649.15	13921.3	289.85	2.83279	6099.15	213364	1839.85	12.4726
7649.2	13921.6	289.8	2.84428	6099.2	196392	1839.8	11.3362
7649.25	13712.8	289.75	2.67134	6099.25	178642	1839.75	10.1464
7649.3	13664.3	289.7	2.64011	6099.3	163734	1839.7	9.15159
7649.35	13887.3	289.65	2.84892	6099.35	150187	1839.65	8.25016
7649.4	13954.1	289.6	2.91984	6099.4	136804	1839.6	7.36014
7649.45	13744.9	289.55	2.74713	6099.45	123255	1839.55	6.45872
7649.5	13511.2	289.5	2.55291	6099.5	109148	1839.5	5.51917
7649.55	13657.2	289.45	2.69423	6099.55	95388.2	1839.45	4.60353
7649.6	13627.8	289.4	2.68079	6099.6	82801.9	1839.4	3.76842
7649.65	13223.7	289.35	2.33641	6099.65	73424	1839.35	3.15336
7649.7	13257.6	289.3	2.37919	6099.7	67421.6	1839.3	2.76983
7649.75	13987.7	289.25	3.03715	6099.75	61998	1839.25	2.42605
7649.8	13969.6	289.2	3.03427	6099.8	55947.4	1839.2	2.03937
7649.85	13906.9	289.15	2.9921	6099.85	50129.8	1839.15	1.66873
7649.9	13474.2	289.1	2.62316	6099.9	45091.5	1839.1	1.35161
7649.95	13621.8	289.05	2.76703	6099.95	40801	1839.05	1.08584
7650	13806.9	289	2.94417	6100	38429	1839	0.95167
7650.05	14177	288.95	3.28489	6100.05	36056.7	1838.95	0.81755
7650.1	13945.3	288.9	3.09407	6100.1	32710.2	1838.9	0.61671
7650.15	13676.8	288.85	2.87083	6100.15	30272.5	1838.85	0.47826
7650.2	13508.9	288.8	2.73657	6100.2	28661.9	1838.8	0.39658
7650.25	13370.6	288.75	2.62868	6100.25	27785.3	1838.75	0.36529
7650.3	13655.8	288.7	2.89499	6100.3	26296	1838.7	0.29206
7650.35	14140.6	288.65	3.33774	6100.35	24809.8	1838.65	0.21911
7650.4	14191.1	288.6	3.39695	6100.4	23750.8	1838.6	0.17552
7650.45	13804.6	288.55	3.07015	6100.45	22910.3	1838.55	0.14697
7650.5	13728.4	288.5	3.01763	6100.5	21971.9	1838.5	0.11177
7650.55	13964.7	288.45	3.24134	6100.55	21035.2	1838.45	0.07675
7650.6	14180.5	288.4	3.44698	6100.6	19961.9	1838.4	0.03241
7650.65	14673.1	288.35	3.89737	6100.65	19192.5	1838.35	0.00898
7650.7	14828.7	288.3	4.05006	6100.7	18816	1838.3	0.01254
7650.75	14048.5	288.25	3.37609	6100.75	17915.1	1838.25	-0.01979
7650.8	13890.9	288.2	3.25229	6100.8	17872.8	1838.2	0.0068
7650.85	14531.4	288.15	3.83372	6100.85	17668.4	1838.15	0.02233
7650.9	15142.4	288.1	4.38907	6100.9	16911.1	1838.1	0
7650.95	15486.4	288.05	4.70878	6100.95	16945.6	1838.05	0.03196
7651	15671.3	288	4.8879	6101	16636.2	1838	0.04008
7651.05	15130.2	287.95	4.42577	6101.05	15843.2	1837.95	0.01448
7651.1	14626.7	287.9	3.99697	6101.1	15887.7	1837.9	0.04541
7651.15	14755.7	287.85	4.12696	6101.15	16180.6	1837.85	0.09218
7651.2	14818.2	287.8	4.19838	6101.2	15122.2	1837.8	0.04479
7651.25	15336.7	287.75	4.67272	6101.25	14128.3	1837.75	0
7651.3	16236.7	287.7	5.4841	6101.3	14213.7	1837.7	0.02712
7651.35	16374.7	287.65	5.6225	6101.35	14538.7	1837.65	0.06846
7651.4	16110.8	287.6	5.40583	6101.4	14746.4	1837.6	0.09947
7651.45	16335.2	287.55	5.62057	6101.45	14357.1	1837.55	0.08718
7651.5	16737.6	287.5	5.99274	6101.5	14072.4	1837.5	0.07962
7651.55	16643.3	287.45	5.92617	6101.55	13385.6	1837.45	0.04197
7651.6	16743.6	287.4	6.03155	6101.6	12673.8	1837.4	0
7651.65	16513.8	287.35	5.84532	6101.65	12495.9	1837.35	-0.00793
7651.7	16200	287.3	5.58498	6101.7	12989.1	1837.3	0.028
7651.75	16711.7	287.25	6.0541	6101.75	12896.8	1837.25	0.02219
7651.8	17579.3	287.2	6.8376	6101.8	12689.4	1837.2	0.00743
7651.85	18260.8	287.15	7.45675	6101.85	12890.6	1837.15	0.02015
7651.9	18480.1	287.1	7.66766	6101.9	12837.1	1837.1	0.01542
7651.95	18327.7	287.05	7.55026	6101.95	12619.7	1837.05	0
7652	18463	287	7.68706	6102	12377.2	1837	-0.01616
7652.05	18695.3	286.95	7.90958	6102.05	11988.1	1836.95	-0.04134
7652.1	19265.7	286.9	8.43086	6102.1	12136.7	1836.9	-0.0287
7652.15	19832.1	286.85	8.94872	6102.15	12230	1836.85	-0.01894
7652.2	20783.8	286.8	9.80697	6102.2	12193.6	1836.8	-0.01722
7652.25	21242.7	286.75	10.2299	6102.25	12088.8	1836.75	-0.01942
7652.3	20715.8	286.7	9.78195	6102.3	11893.9	1836.7	-0.02707
7652.35	20362.2	286.65	9.48716	6102.35	11675.1	1836.65	-0.0357
7652.4	21107.4	286.6	10.1632	6102.4	11026.5	1836.6	-0.07319
7652.45	22099.6	286.55	11.0574	6102.45	10957.4	1836.55	-0.07041
7652.5	22406.4	286.5	11.3462	6102.5	11332.3	1836.5	-0.03671
7652.55	22456.7	286.45	11.4084	6102.55	11557.5	1836.45	-0.01284
7652.6	22377.4	286.4	11.356	6102.6	10981.3	1836.4	-0.04356
7652.65	22412.8	286.35	11.4051	6102.65	10620.8	1836.35	-0.05919
7652.7	22718.7	286.3	11.6932	6102.7	10597.6	1836.3	-0.05145
7652.75	23572	286.25	12.4649	6102.75	10759	1836.25	-0.03087
7652.8	24023.2	286.2	12.8815	6102.8	10577.4	1836.2	-0.0337
7652.85	24162.6	286.15	13.0225	6102.85	10927.6	1836.15	0
7652.9	24625.6	286.1	13.4495	6102.9	11138.1	1836.1	0.02413
7652.95	24254.3	286.05	13.1394	6102.95	10815.9	1836.05	0.01166
7653	24167	286	13.0802	6103	10636.1	1836	0.00885
7653.05	24073.9	285.95	13.0159
7653.1	24580.3	285.9	13.4813
7653.15	25605.8	285.85	14.4054
7653.2	26909.8	285.8	15.5754
7653.25	27635	285.75	16.2341
7653.3	28054.5	285.7	16.6227
7653.35	27959.3	285.65	16.5567
7653.4	28932.8	285.6	17.4348
7653.45	30362.2	285.55	18.7157
7653.5	30967.9	285.5	19.2688
7653.55	31536.3	285.45	19.789
7653.6	32795	285.4	20.919
7653.65	33800.9	285.35	21.8258
7653.7	35228.4	285.3	23.1049
7653.75	36495	285.25	24.2419
7653.8	38802	285.2	26.298
7653.85	42677.1	285.15	29.7395
7653.9	46815.4	285.1	33.4136
7653.95	49127	285.05	35.4737
7654	52622.1	285	38.5795
7654.05	56205.6	284.95	41.7633
7654.1	60424.5	284.9	45.5084
7654.15	64825	284.85	49.414
7654.2	67266.7	284.8	51.589
7654.25	70383.4	284.75	54.3602
7654.3	74301.2	284.7	57.8393
7654.35	76893.2	284.65	60.1469
7654.4	77744.7	284.6	60.9169
7654.45	76328.8	284.55	59.6836
7654.5	75254.8	284.5	58.7524
7654.55	73025.4	284.45	56.8004
7654.6	68366.8	284.4	52.7022
7654.65	62655.7	284.35	47.674
7654.7	56279.7	284.3	42.0585
7654.75	50016.9	284.25	36.5429
7654.8	43252.6	284.2	30.5841
7654.85	36714	284.15	24.8248
7654.9	31190.5	284.1	19.9622
7654.95	26293.8	284.05	15.6533
7655	22618.2	284	12.4231
7655.05	20122.8	283.95	10.2356
7655.1	17985.5	283.9	8.36429
7655.15	16495	283.85	7.06443
7655.2	15389.7	283.8	6.10481
7655.25	13914.9	283.75	4.81865
7655.3	12771.9	283.7	3.82555
7655.35	12249.8	283.65	3.381
7655.4	11795.8	283.6	2.9965
7655.45	11278	283.55	2.55546
7655.5	10871.4	283.5	2.21275
7655.55	10112.8	283.45	1.55884
7655.6	9390.72	283.4	0.93722
7655.65	9165.12	283.35	0.7541
7655.7	9368.96	283.3	0.9503
7655.75	9821.02	283.25	1.36571
7655.8	9722.02	283.2	1.29418
7655.85	9157.44	283.15	0.81123
7655.9	9046.65	283.1	0.72911
7655.95	8800.81	283.05	0.52758
7656	8565.98	283	0.33568
7656.05	8829.6	282.95	0.58405
7656.1	8622.52	282.9	0.41648
7656.15	8263.75	282.85	0.11478
7656.2	8229.91	282.8	0.10005
7656.25	8207.38	282.75	0.09521
7656.3	8091.88	282.7	0.00813
7656.35	8286.06	282.65	0.19453
7656.4	8357.09	282.6	0.27202
7656.45	8032.64	282.55	0
7656.5	7739.83	282.5	-0.24418
7656.55	7522.84	282.45	-0.42149
7656.6	7346.86	282.4	-0.56269
7656.65	7415.61	282.35	-0.48781
7656.7	7946.42	282.3	-0.00483
7656.75	8232.46	282.25	0.26176
7656.8	7927.6	282.2	0.00618
7656.85	7779.39	282.15	-0.11115
7656.9	8267.06	282.1	0.33316
7656.95	8465.54	282.05	0.52184
7657	8262.25	282	0.3554
7657.05	8153.87	281.95	0.27268
7657.1	7792.7	281.9	-0.03354
7657.15	7532.4	281.85	-0.25082
7657.2	7437.85	281.8	-0.3218
7657.25	7311.09	281.75	-0.42143
7657.3	7475.02	281.7	-0.2644
7657.35	7841.42	281.65	0.07132
7657.4	7905.24	281.6	0.13954
7657.45	7494.6	281.55	-0.21158
7657.5	7794.81	281.5	0.06512
7657.55	7987.8	281.45	0.2469
7657.6	7986.37	281.4	0.25674
7657.65	8231.42	281.35	0.48412
7657.7	8033.14	281.3	0.31965
7657.75	7632.13	281.25	-0.02415
7657.8	7292.8	281.2	-0.31366
7657.85	7188.84	281.15	-0.39543
7657.9	7256.05	281.1	-0.32619
7657.95	7476.12	281.05	-0.12213
7658	7647.79	281	0.03895
7658.05	8078.4	280.95	0.42858
7658.1	7879.9	280.9	0.26217
7658.15	7511.9	280.85	-0.05422
7658.2	7365.94	280.8	-0.17468
7658.25	7412.75	280.75	-0.12506
7658.3	7652.49	280.7	0.09475
7658.35	7831.88	280.65	0.261
7658.4	8117.4	280.6	0.52075
7658.45	7966.3	280.55	0.39452
7658.5	7660.03	280.5	0.13094
7658.55	7313.16	280.45	-0.16877
7658.6	6993.85	280.4	-0.4444
7658.65	6738.22	280.35	-0.66404
7658.7	7268.57	280.3	-0.18956
7658.75	8102.1	280.25	0.5525
7658.8	8027.23	280.2	0.49172
7658.85	7734.85	280.15	0.23851
7658.9	7575.89	280.1	0.10288
7658.95	7291.45	280.05	-0.1439
7659	7413.27	280	-0.03205
7659.05	7532.9	279.95	0.07756
7659.1	7380.84	279.9	-0.05316
7659.15	7335.31	279.85	-0.09007
7659.2	7433.85	279.8	0
7659.25	7857.04	279.75	0.37658
7659.3	7999.4	279.7	0.50475
7659.35	7583.64	279.65	0.13953
7659.4	7864.88	279.6	0.38982
7659.45	8012.63	279.55	0.5219
7659.5	7640.83	279.5	0.1947
7659.55	7467.02	279.45	0.04215
7659.6	7791.79	279.4	0.32984
7659.65	7976.12	279.35	0.49321
7659.7	8096.72	279.3	0.60005
7659.75	7829.21	279.25	0.36378
7659.8	7849.96	279.2	0.38195
7659.85	7679.59	279.15	0.23109
7659.9	7459.65	279.1	0.03623
7659.95	7560.92	279.05	0.12495
7660	7669.04	279	0.21955
7660.05	7860.76	278.95	0.38784
7660.1	7693.86	278.9	0.23913
7660.15	7626.93	278.85	0.17859
7660.2	7852.35	278.8	0.37619
7660.25	7821.11	278.75	0.3469
7660.3	7576.19	278.7	0.1287
7660.35	7453.68	278.65	0.01854
7660.4	7494.29	278.6	0.05237
7660.45	7785.63	278.55	0.30762
7660.5	8085.16	278.5	0.57001
7660.55	7980.99	278.45	0.47566
7660.6	7724.55	278.4	0.24671
7660.65	7622.64	278.35	0.15421
7660.7	7689.58	278.3	0.21084
7660.75	7550.01	278.25	0.08497
7660.8	7101.94	278.2	-0.31349
7660.85	7448.02	278.15	-0.01037
7660.9	7572.47	278.1	0.09692
7660.95	7297.09	278.05	-0.14904
7661	7429.98	278	-0.0343
7661.05	7739.2	277.95	0.23622
7661.1	8039.74	277.9	0.49906
7661.15	8213.93	277.85	0.65029
7661.2	7983.14	277.8	0.44374
7661.25	7683.37	277.75	0.17623
7661.3	7679.05	277.7	0.16975
7661.35	7589.72	277.65	0.08817
7661.4	7703.34	277.6	0.18588
7661.45	8004.15	277.55	0.44897
7661.5	8224.1	277.5	0.64063
7661.55	8225.65	277.45	0.63934
7661.6	7902.8	277.4	0.35145
7661.65	7669.21	277.35	0.14242
7661.7	7920.53	277.3	0.3618
7661.75	7896.12	277.25	0.33758
7661.8	8046.8	277.2	0.46804
7661.85	8338.7	277.15	0.72327
7661.9	7891.73	277.1	0.32573
7661.95	7718.71	277.05	0.17021
7662	8042.22	277	0.45337
7662.05	7768.02	276.95	0.20847
7662.1	7790.12	276.9	0.22534
7662.15	8079.37	276.85	0.47824
7662.2	8313.28	276.8	0.68224
7662.25	8386.93	276.75	0.74466
7662.3	7647.31	276.7	0.08857
7662.35	7202	276.65	-0.3075
7662.4	7369.54	276.6	-0.16213
7662.45	7468.6	276.55	-0.07726
7662.5	7743.05	276.5	0.16255
7662.55	7826.01	276.45	0.2332
7662.6	7813.37	276.4	0.21939
7662.65	7530.15	276.35	-0.03348
7662.7	7206.03	276.3	-0.32248
7662.75	7277.29	276.25	-0.26216
7662.8	7318.92	276.2	-0.22803
7662.85	7818.44	276.15	0.21063
7662.9	7914.95	276.1	0.29325
7662.95	7657.31	276.05	0.06299
7663	7767.31	276	0.15752
7663.05	7370.52	275.95	-0.19567
7663.1	7218.28	275.9	-0.33282
7663.15	7481.3	275.85	-0.10308
7663.2	7555.84	275.8	-0.03987
7663.25	7512.99	275.75	-0.08037
7663.3	7321.64	275.7	-0.25207
7663.35	7415.03	275.65	-0.1722
7663.4	7697.46	275.6	0.07467
7663.45	8220.19	275.55	0.53384
7663.5	8164.68	275.5	0.48216
7663.55	7719.02	275.45	0.08579
7663.6	7782.25	275.4	0.13901
7663.65	7672.03	275.35	0.039
7663.7	7953.01	275.3	0.28459
7663.75	7836.47	275.25	0.17898
7663.8	7335.25	275.2	-0.26647
7663.85	7245.76	275.15	-0.34817
7663.9	7510.53	275.1	-0.11689
7663.95	7618.69	275.05	-0.02398
7664	7648.82	275	0

## Sheet: NMC111
This file contains the raw data (intensity as a function of kinetic energy) and the processed data (intensity as a function of binding energy, normalised when necessary), with each tab corresponding to a different material, arranged in the same order and labeled using the abbreviations listed in Table S1.
Supplementary Information for: X‑Ray Photoelectron Spectroscopy Analysis of Reference Compounds for Studying Rechargeable Li‑, Na‑, and K‑ion Batteries
C1s				F1s				O1s				P1s
Raw data		Processed data		Raw data		Processed data		Raw data		Processed data		Raw data		Processed data
Kinetic energy / eV	Intensity / a.u.	Binding energy / eV	Intensity / a.u.	Kinetic energy / eV	Intensity / a.u.	Binding energy / eV	Intensity / a.u.	Kinetic energy / eV	Intensity / a.u.	Binding energy / eV	Intensity / a.u.	Kinetic energy / eV	Intensity / a.u.	Binding energy / eV	Intensity / a.u.
7639	12155	300	0	7239	17734.6	700	0	7394	12500.8	545	-999.269	5779	45169.2	2160	1722.12
7639.1	13083.2	299.9	896.568	7239.1	17604.1	699.9	-131.808	7394.1	12586.7	544.9	-895.586	5779.1	42533.9	2159.9	-917.312
7639.2	12960.2	299.8	742.894	7239.2	18804.8	699.8	1067.75	7394.2	12253.1	544.8	-1212.32	5779.2	43431.1	2159.8	-23.297
7639.3	12418.4	299.7	172.118	7239.3	18826.6	699.7	1088.8	7394.3	13688.7	544.7	239.465	5779.3	42555.7	2159.7	-901.032
7639.4	12807.8	299.6	535.113	7239.4	19408.4	699.6	1670.4	7394.4	14061.6	544.6	627.83	5779.4	42573.4	2159.6	-884.975
7639.5	12633.5	299.5	337.905	7239.5	18945.8	699.5	1208.38	7394.5	13128.1	544.5	-290.723	5779.5	45274.9	2159.5	1815.53
7639.6	12582.4	299.4	268.127	7239.6	18643.6	699.4	907.657	7394.6	14519.5	544.4	1115.3	5779.6	44221.4	2159.4	761.355
7639.7	12604.2	299.3	276.49	7239.7	19280.8	699.3	1547.42	7394.7	13939	544.3	549.134	5779.7	43766.8	2159.3	306.497
7639.8	12421.4	299.2	86.2584	7239.8	17352.8	699.2	-376.609	7394.8	14154.2	544.2	778.563	5779.8	45589.6	2159.2	2129.28
7639.9	12997.6	299.1	661.912	7239.9	17625.6	699.1	-98.4321	7394.9	12791.8	544.1	-569.707	5779.9	42660.2	2159.1	-800.065
7640	12939	299	610.55	7240	18252.8	699	535.869	7395	13821.1	544	473.877	5780	43081	2159	-379.2
7640.1	12173.5	298.9	-139.157	7240.1	17659.4	698.9	-48.5343	7395.1	14425.9	543.9	1093.18	5780.1	45217.5	2158.9	1757.15
7640.2	12754	298.8	466.646	7240.2	17601.2	698.8	-95.6455	7395.2	13630.9	543.8	313.08	5780.2	44439	2158.8	978.148
7640.3	12695.6	298.7	443.927	7240.3	18179.5	698.7	495.909	7395.3	13300.7	543.7	-1.74765	5780.3	45085.4	2158.7	1623.76
7640.4	11484.1	298.6	-721.113	7240.4	18226.7	698.6	558.899	7395.4	13033.5	543.6	-252.981	5780.4	44865.8	2158.6	1402.77
7640.5	11595.2	298.5	-554.007	7240.5	18040.3	698.5	390.814	7395.5	13302.4	543.5	32.66	5780.5	44868.6	2158.5	1403.55
7640.6	11980.4	298.4	-104.908	7240.6	16154.9	698.4	-1473.46	7395.6	13344.1	543.4	91.951	5780.6	44989.6	2158.4	1521.76
7640.7	12868.7	298.3	853.616	7240.7	17198.4	698.3	-405.737	7395.7	12993.8	543.3	-239.683	5780.7	43816.7	2158.3	345.078
7640.8	12573.6	298.2	633.289	7240.8	17996.6	698.2	419.807	7395.8	12854	543.2	-359.786	5780.8	42741.3	2158.2	-734.988
7640.9	11992.2	298.1	129.793	7240.9	17546.1	698.1	0	7395.9	13677.5	543.1	484.661	5780.9	43608.7	2158.1	126.541
7641	12096.5	298	313.295	7241	17202.8	698	-309.139	7396	13931.7	543	761.221	5781	41656	2158	-1833.08
7641.1	11901.5	297.9	197.276	7241.1	17598	697.9	123.371	7396.1	13210	542.9	63.2814	5781.1	42756.7	2157.9	-740.293
7641.2	12471.1	297.8	843.961	7241.2	17561.7	697.8	127.014	7396.2	13428.7	542.8	307.409	5781.2	43133.2	2157.8	-372.757
7641.3	12644.9	297.7	1091.33	7241.3	16638.3	697.7	-754.089	7396.3	13861.7	542.7	767.665	5781.3	44494.2	2157.7	978.365
7641.4	12465	297.6	979.904	7241.4	16411.2	697.6	-937.093	7396.4	12983.2	542.6	-81.8208	5781.4	44947.5	2157.6	1420.93
7641.5	11232.2	297.5	-191.292	7241.5	16773.8	697.5	-529.046	7396.5	13273.4	542.5	239.48	5781.5	42618.7	2157.5	-919.57
7641.6	11370.2	297.4	0	7241.6	16715.8	697.4	-540.598	7396.6	13284.3	542.4	283.601	5781.6	42094.3	2157.4	-1456.37
7641.7	12150.6	297.3	823.853	7241.7	16653.4	697.3	-555.952	7396.7	13442.4	542.3	477.201	5781.7	43645.8	2157.3	81.8249
7641.8	12597.4	297.2	1304.47	7241.8	16548.5	697.2	-613.786	7396.8	12440.2	542.2	-487.362	5781.8	44750.9	2157.2	1172.98
7641.9	11478.4	297.1	209.968	7241.9	15843.6	697.1	-1271.88	7396.9	12568.5	542.1	-319.42	5781.9	45635	2157.1	2042.4
7642	11703.5	297	450.471	7242	15664.8	697	-1404.58	7397	13003.8	542	157.244	5782	43355	2157	-252.934
7642.1	11765.5	296.9	519.224	7242.1	16904.2	696.9	-120.365	7397.1	13603	541.9	799.243	5782.1	43372.8	2156.9	-251.042
7642.2	11872.1	296.8	624.217	7242.2	17609.3	696.8	628.029	7397.2	13661.2	541.8	901.277	5782.2	44632.9	2156.8	992.538
7642.3	11868	296.7	610.521	7242.3	16705.6	696.7	-234.463	7397.3	13378.2	541.7	663.01	5782.3	43593.2	2156.7	-64.2181
7642.4	12220.1	296.6	945.429	7242.4	16332.6	696.6	-568.788	7397.4	12847.6	541.6	177.583	5782.4	44157.6	2156.6	482.658
7642.5	11373.3	296.5	74.0264	7242.5	17031.4	696.5	165.89	7397.5	13263.7	541.5	639.181	5782.5	44764.7	2156.5	1071.79
7642.6	11441.3	296.4	110.525	7242.6	18378.9	696.4	1545.9	7397.6	13410.4	541.4	831.171	5782.6	45313.5	2156.4	1602.19
7642.7	12017.7	296.3	648.744	7242.7	17662.4	696.3	858.134	7397.7	13028.1	541.3	493.975	5782.7	45479.4	2156.3	1749.32
7642.8	11866.8	296.2	453.418	7242.8	16801.7	696.2	21.8813	7397.8	13444.3	541.2	954.561	5782.8	45551.8	2156.2	1802.64
7642.9	12128.1	296.1	664.327	7242.9	16678.4	696.1	-81.5399	7397.9	13264.6	541.1	818.264	5782.9	43857.6	2156.1	89.0531
7643	12773.5	296	1253.79	7243	16821.3	696	76.2715	7398	12627.4	541	223.261	5783	44065.6	2156	277.512
7643.1	12556.5	295.9	975.564	7243.1	17285.2	695.9	550.021	7398.1	12272.5	540.9	-90.9112	5783.1	43299.5	2155.9	-508.425
7643.2	12153.1	295.8	506.271	7243.2	16056.6	695.8	-673.357	7398.2	12365.7	540.8	41.1253	5783.2	44650.7	2155.8	822.866
7643.3	11781.5	295.7	64.8581	7243.3	16208.1	695.7	-520.912	7398.3	12973.8	540.7	686.026	5783.3	43734.6	2155.7	-113.288
7643.4	12712.7	295.6	923.124	7243.4	16445.9	695.6	-286.058	7398.4	12463.4	540.6	209.993	5783.4	43189.1	2155.6	-678.937
7643.5	12238.2	295.5	373.151	7243.5	16622.1	695.5	-116.272	7398.5	12340.6	540.5	118.992	5783.5	43359.7	2155.5	-528.459
7643.6	12209.7	295.4	267.427	7243.6	17396.4	695.4	648.474	7398.6	12327.2	540.4	134.803	5783.6	43732.3	2155.4	-176.034
7643.7	12354.1	295.3	333.536	7243.7	17143.1	695.3	382.829	7398.7	12220.8	540.3	55.2311	5783.7	44815.7	2155.3	887.266
7643.8	11820.4	295.2	-278.859	7243.8	16843.1	695.2	68.0442	7398.8	11906.5	540.2	-234.612	5783.8	45510.4	2155.2	1561.92
7643.9	12697	295.1	519.469	7243.9	16549.3	695.1	-242.491	7398.9	12611.2	540.1	492.401	5783.9	43456.2	2155.1	-512.141
7644	13095.7	295	841.001	7244	16437.2	695	-373.024	7399	12456.5	540	357.858	5784	43860.9	2155	-127.1
7644.1	13619.6	294.9	1289.45	7244.1	16163.8	694.9	-666.125	7399.1	12979	539.9	898.545	5784.1	44910	2154.9	902.55
7644.2	12896.7	294.8	493.749	7244.2	16520.7	694.8	-329.802	7399.2	13012.6	539.8	948.53	5784.2	44666.7	2154.8	640.035
7644.3	12472.6	294.7	0	7244.3	17183.8	694.7	312.139	7399.3	12337	539.7	287.531	5784.3	44345.4	2154.7	299.861
7644.4	13012.2	294.6	473.723	7244.4	17556.2	694.6	663.278	7399.4	12262.3	539.6	225.787	5784.4	45302	2154.6	1237.85
7644.5	13571.2	294.5	970.826	7244.5	17104.9	694.5	190.937	7399.5	12494.8	539.5	469.745	5784.5	46334	2154.5	2251.66
7644.6	13389.1	294.4	730.606	7244.6	16355.4	694.4	-579.052	7399.6	11906	539.4	-109.053	5784.6	46797.5	2154.4	2697.46
7644.7	12987.2	294.3	274.373	7244.7	16135.3	694.3	-818.556	7399.7	11908.1	539.3	-98.141	5784.7	44751.7	2154.3	634.35
7644.8	13556.5	294.2	793.216	7244.8	16821.1	694.2	-150.949	7399.8	12405	539.2	406.349	5784.8	43447.5	2154.2	-686.634
7644.9	13480.9	294.1	670.722	7244.9	17316.8	694.1	328.321	7399.9	12339.8	539.1	347.767	5784.9	45537.6	2154.1	1387.28
7645	13229.1	294	375.797	7245	16637.3	694	-365.43	7400	12122.6	539	136.264	5785	44871.1	2154	705.113
7645.1	14136.9	293.9	1243.94	7245.1	15986.8	693.9	-1027.88	7400.1	12084.9	538.9	103.521	5785.1	45364.7	2153.9	1183.76
7645.2	14814.8	293.8	1885.83	7245.2	16507.3	693.8	-516.33	7400.2	12226.9	538.8	249.756	5785.2	45413.3	2153.8	1218.07
7645.3	15294.9	293.7	2333.43	7245.3	16263.7	693.7	-765.781	7400.3	12057	538.7	83.6735	5785.3	45805.1	2153.7	1596.23
7645.4	13916.7	293.6	926.18	7245.4	17031.7	693.6	0	7400.4	11879.2	538.6	-90.8088	5785.4	44674.7	2153.6	453.007
7645.5	13951.5	293.5	935.287	7245.5	16916	693.5	-114.092	7400.5	11736.6	538.5	-230.316	5785.5	45527.7	2153.5	1293.97
7645.6	14819	293.4	1780.56	7245.6	17102.5	693.4	77.6955	7400.6	12221.4	538.4	257.506	5785.6	44494.3	2153.4	249.366
7645.7	15278	293.3	2220.54	7245.7	17181.1	693.3	165.012	7400.7	12606.5	538.3	645.468	5785.7	42643.4	2153.3	-1611.76
7645.8	15211.5	293.2	2138.29	7245.8	16780.7	693.2	-223.549	7400.8	12303.7	538.2	345.819	5785.8	45877.7	2153.2	1613.11
7645.9	15278.4	293.1	2192.7	7245.9	17025.8	693.1	36.2111	7400.9	12017.2	538.1	62.6209	5785.9	46703.1	2153.1	2429.85
7646	15445.2	293	2350.1	7246	17566.8	693	594.437	7401	10603.5	538	-1347.44	5786	44251	2153	-29.97
7646.1	15246.8	292.9	2145.46	7246.1	17003.9	692.9	51.0559	7401.1	11327.2	537.9	-619.544	5786.1	45211.3	2152.9	923.369
7646.2	15171.5	292.8	2067.01	7246.2	17494.8	692.8	563.474	7401.2	11314.8	537.8	-627.11	5786.2	45657.4	2152.8	1363.35
7646.3	15324.8	292.7	2220.23	7246.3	17762.6	692.7	854.494	7401.3	12046.5	537.7	110.157	5786.3	44961.9	2152.7	662.461
7646.4	14864.9	292.6	1763.09	7246.4	18023.3	692.6	1139.87	7401.4	12972.7	537.6	1042.8	5786.4	45864.7	2152.6	1560.74
7646.5	15309.5	292.5	2213.46	7246.5	18313.3	692.5	1455.76	7401.5	12713.9	537.5	791.358	5786.5	45962.3	2152.5	1654.44
7646.6	14837.5	292.4	1750.04	7246.6	17116.1	692.4	285.318	7401.6	12036	537.4	121.664	5786.6	44639.5	2152.4	328.493
7646.7	14695	292.3	1619	7246.7	17293.6	692.3	490.183	7401.7	11817.3	537.3	-87.9453	5786.7	45404.2	2152.3	1090.72
7646.8	14774	292.2	1712.16	7246.8	17030	692.2	254.315	7401.8	12378.8	537.2	483.501	5786.8	46916.5	2152.2	2601.21
7646.9	15470.7	292.1	2425.77	7246.9	17545.7	692.1	797.794	7401.9	11826.2	537.1	-58.3849	5786.9	47023.1	2152.1	2706.68
7647	16449.1	292	3423.82	7247	16695.9	692	-24.4752	7402	12189.1	537	316.176	5787	46124.4	2152	1807.55
7647.1	16315.7	291.9	3312.56	7247.1	17960.1	691.9	1267.18	7402.1	12757.5	536.9	896.918	5787.1	47372.3	2151.9	3055.55
7647.2	16881.6	291.8	3903.33	7247.2	16726.8	691.8	61.1935	7402.2	12580.5	536.8	733.089	5787.2	47379.4	2151.8	3063.39
7647.3	18087.7	291.7	5136.7	7247.3	18182.8	691.7	1544.27	7402.3	13134.8	536.7	1301.26	5787.3	48646.1	2151.7	4331.43
7647.4	18790.6	291.6	5869.42	7247.4	18152.8	691.6	1541.23	7402.4	12901.2	536.6	1082.37	5787.4	49124	2151.6	4811.26
7647.5	20021.4	291.5	7132.46	7247.5	17283.1	691.5	698.238	7402.5	12306.7	536.5	503.284	5787.5	48206.7	2151.5	3896.33
7647.6	20813.5	291.4	7959.15	7247.6	17532.7	691.4	974.41	7402.6	12016.5	536.4	229.22	5787.6	48983.7	2151.4	4676.26
7647.7	21558.6	291.3	8741.22	7247.7	16677.3	691.3	145.378	7402.7	11508.4	536.3	-262.081	5787.7	47430.8	2151.3	3126.87
7647.8	24317.1	291.2	11539	7247.8	16036.5	691.2	-469.204	7402.8	12022.9	536.2	269.942	5787.8	47074.9	2151.2	2774.89
7647.9	25210	291.1	12473.4	7247.9	16491.6	691.1	12.0002	7402.9	13065.1	536.1	1330.35	5787.9	46666.6	2151.1	2371.02
7648	25794.9	291	13101.9	7248	17614.8	691	1161.05	7403	12556.6	536	840.756	5788	48294.3	2151	4003.49
7648.1	27727.2	290.9	15079.9	7248.1	17443.2	690.9	1015.17	7403.1	13291	535.9	1594.57	5788.1	49252.7	2150.9	4967.23
7648.2	28689.4	290.8	16090	7248.2	18004.7	690.8	1602.23	7403.2	12315.5	535.8	639.193	5788.2	51005.5	2150.8	6725.65
7648.3	28805.6	290.7	16256.1	7248.3	17885.6	690.7	1508.5	7403.3	12671.5	535.7	1015.92	5788.3	48269.1	2150.7	3995.33
7648.4	28676.9	290.6	16179.4	7248.4	17452.8	690.6	1100.94	7403.4	12813.5	535.6	1179.19	5788.4	49147	2150.6	4879.73
7648.5	28003	290.5	15559.4	7248.5	18092.5	690.5	1765.57	7403.5	13001.6	535.5	1389.16	5788.5	48065.2	2150.5	3804.66
7648.6	27161.7	290.4	14773.8	7248.6	18677.6	690.4	2375.59	7403.6	13053	535.4	1463.08	5788.6	47589.2	2150.4	3335.82
7648.7	26382.6	290.3	14052.2	7248.7	18217.5	690.3	1940.13	7403.7	12905.2	535.3	1338.17	5788.7	47269.6	2150.3	3023.62
7648.8	26191.8	290.2	13920.9	7248.8	18162.7	690.2	1909.83	7403.8	12350.7	535.2	807.199	5788.8	47047.5	2150.2	2809.22
7648.9	24992.7	290.1	12782.8	7248.9	19441.2	690.1	3212.7	7403.9	13710	535.1	2190.53	5788.9	47620.7	2150.1	3390.41
7649	23511.4	290	11364.4	7249	20972.4	690	4768	7404	14115.1	535	2620.15	5789	46538.8	2150	2316.75
7649.1	22649.3	289.9	10566.8	7249.1	21313.4	689.9	5132.94	7404.1	14559.5	534.9	3089.45	5789.1	46685.8	2149.9	2472.15
7649.2	21020	289.8	9003.53	7249.2	22253.6	689.8	6096.95	7404.2	14973.5	534.8	3528.94	5789.2	47693.7	2149.8	3488.78
7649.3	19242.9	289.7	7294.09	7249.3	23261.2	689.7	7128.21	7404.3	15203.7	534.7	3785.02	5789.3	46637.7	2149.7	2441.68
7649.4	19900.2	289.6	8020.5	7249.4	24066.7	689.6	7957.16	7404.4	14593.6	534.6	3201.27	5789.4	47834.6	2149.6	3647.64
7649.5	20092.4	289.5	8283.22	7249.5	24994.1	689.5	8907.8	7404.5	16517.4	534.5	5151.74	5789.5	46091.4	2149.5	1913.57
7649.6	18970.6	289.4	7233.4	7249.6	29454.1	689.4	13390.9	7404.6	16922.8	534.4	5584.32	5789.6	45389.5	2149.4	1221.01
7649.7	17973.3	289.3	6309.43	7249.7	31910.4	689.3	15870.2	7404.7	16472.6	534.3	5161.6	5789.7	44516.9	2149.3	357.851
7649.8	19258.7	289.2	7669.52	7249.8	34899.9	689.2	18882.4	7404.8	16722.2	534.2	5439.01	5789.8	44072	2149.2	-77.5012
7649.9	18677.6	289.1	7164.34	7249.9	39057.9	689.1	23062.9	7404.9	17348.7	534.1	6093.74	5789.9	46322.4	2149.1	2182.58
7650	17940.6	289	6504.44	7250	43559.6	689	27587	7405	18054.6	534	6828.19	5790	45867.8	2149	1737.65
7650.1	18892.4	288.9	7534.51	7250.1	47661.6	688.9	31711.3	7405.1	18840.7	533.9	7643.19	5790.1	45446.4	2148.9	1325.97
7650.2	19472	288.8	8193.49	7250.2	53763.9	688.8	37835.6	7405.2	18835.7	533.8	7667.38	5790.2	46044.9	2148.8	1934.2
7650.3	20501	288.7	9302.91	7250.3	60674.6	688.7	44768.2	7405.3	19750.6	533.7	8611.67	5790.3	46064.4	2148.7	1963.41
7650.4	20125.1	288.6	9008.46	7250.4	67089	688.6	51204.2	7405.4	19767.8	533.6	8658.6	5790.4	45018.5	2148.6	927.184
7650.5	20018.7	288.5	8984.46	7250.5	72394.5	688.5	56531.3	7405.5	19543.7	533.5	8464.48	5790.5	46168.7	2148.5	2087.13
7650.6	20823.9	288.4	9872.99	7250.6	81052.3	688.4	65210.4	7405.6	19891.3	533.4	8842.22	5790.6	44492.8	2148.4	420.795
7650.7	22747.2	288.3	11880.5	7250.7	86807.1	688.3	70986.4	7405.7	21311.5	533.3	10292.9	5790.7	44329	2148.3	266.547
7650.8	23700.8	288.2	12919.1	7250.8	92265	688.2	76465.3	7405.8	21087.7	533.2	10099.7	5790.8	44990.2	2148.2	937.207
7650.9	22610.3	288.1	11914.4	7250.9	95409.6	688.1	79630.7	7405.9	21776.3	533.1	10819.2	5790.9	44267.7	2148.1	224.005
7651	22806	288	12196.6	7251	99766.7	688	84008.4	7406	22524	533	11597.8	5791	45467.5	2148	1433.01
7651.1	22627.8	287.9	12105.7	7251.1	106544	687.9	90806.4	7406.1	22196.7	532.9	11301.6	5791.1	43859.3	2147.9	-166.192
7651.2	23860.3	287.8	13426	7251.2	108026	687.8	92308.1	7406.2	22174.2	532.8	11310.4	5791.2	43209.8	2147.8	-806.772
7651.3	24401.8	287.7	14055.8	7251.3	111099	687.7	95401.9	7406.3	21821.6	532.7	10989.2	5791.3	43582.8	2147.7	-425.175
7651.4	24687.1	287.6	14430	7251.4	110033	687.6	94355.7	7406.4	23293	532.6	12492.1	5791.4	44857.1	2147.6	857.638
7651.5	25756.6	287.5	15588.8	7251.5	107108	687.5	91450	7406.5	23085.6	532.5	12316.3	5791.5	43855.9	2147.5	-135.389
7651.6	26474.2	287.4	16396.2	7251.6	103393	687.4	87755	7406.6	22713.3	532.4	11975.6	5791.6	46395.4	2147.4	2412.01
7651.7	26469.7	287.3	16481.9	7251.7	92728.5	687.3	77109.7	7406.7	22575.7	532.3	11869.8	5791.7	45415.6	2147.3	1439.92
7651.8	26230.7	287.2	16333.5	7251.8	89388.5	687.2	73788.8	7406.8	23715.8	532.2	13041.7	5791.8	43112.1	2147.2	-856.192
7651.9	27686.2	287.1	17879.7	7251.9	84230.7	687.1	68650.1	7406.9	24333.7	532.1	13691.4	5791.9	43271.8	2147.1	-689.377
7652	29657.8	287	19942.3	7252	75758.6	687	60196.8	7407	24151.5	532	13541	5792	43652.5	2147	-301.925
7652.1	31578.3	286.9	21954	7252.1	71217.6	686.9	55674.5	7407.1	23333.6	531.9	12754.9	5792.1	43622.7	2146.9	-325.354
7652.2	35988.9	286.8	26455.9	7252.2	65627	686.8	50102.4	7407.2	23198.5	531.8	12651.5	5792.2	43890	2146.8	-52.0147
7652.3	36671.5	286.7	27229.9	7252.3	58512	686.7	43005.8	7407.3	25187.4	531.7	14672.2	5792.3	44043.6	2146.7	107.256
7652.4	37814.1	286.6	28464	7252.4	53294.9	686.6	37806.8	7407.4	24549	531.6	14065.5	5792.4	44377.7	2146.6	446.532
7652.5	40371.8	286.5	31113.1	7252.5	50034.4	686.5	34564.3	7407.5	24010.1	531.5	13558.2	5792.5	42168.8	2146.5	-1757.55
7652.6	42678.7	286.4	33511.5	7252.6	46389	686.4	30936.7	7407.6	24005	531.4	13584.6	5792.6	42189.2	2146.4	-1732.77
7652.7	45649.5	286.3	36573.5	7252.7	45409.5	686.3	29974.7	7407.7	24276.1	531.3	13887.2	5792.7	44379	2146.3	460.902
7652.8	48917.4	286.2	39932.4	7252.8	46313.3	686.2	30895.9	7407.8	24233.6	531.2	13875.9	5792.8	45292.7	2146.2	1377.99
7652.9	52409.1	286.1	43515.1	7252.9	44411.5	686.1	29011.4	7407.9	23603.8	531.1	13277.3	5792.9	44464	2146.1	552.29
7653	53460.8	286	44657.5	7253	44089.4	686	28706.3	7408	23338.6	531	13043.2	5793	44708.8	2146	799.564
7653.1	56504	285.9	47791	7253.1	42681.9	685.9	27315.7	7408.1	23110.1	530.9	12845.4	5793.1	43564.7	2145.9	-342.508
7653.2	56166.5	285.8	47543.4	7253.2	43201.8	685.8	27852.3	7408.2	22856	530.8	12622	5793.2	44266.7	2145.8	361.098
7653.3	56691.8	285.7	48158.2	7253.3	42401	685.7	27068	7408.3	23485.2	530.7	13281.7	5793.3	44569.1	2145.7	664.677
7653.4	58445.5	285.6	50001.1	7253.4	41131.3	685.6	25814.7	7408.4	24636	530.6	14462.8	5793.4	42758.8	2145.6	-1144.83
7653.5	58735	285.5	50379.2	7253.5	40961.7	685.5	25661.2	7408.5	27349.9	530.5	17206.6	5793.5	44749.5	2145.5	846.207
7653.6	61854.4	285.4	53586.7	7253.6	40070.7	685.4	24786.2	7408.6	30992.9	530.4	20879.5	5793.6	45602.3	2145.4	1698.96
7653.7	67202.8	285.3	59022.5	7253.7	37818.6	685.3	22549.9	7408.7	34314.3	530.3	24230.4	5793.7	44970.6	2145.3	1066.87
7653.8	75901.8	285.2	67808.4	7253.8	36950.3	685.2	21697.2	7408.8	40154.2	530.2	30099.4	5793.8	43438.8	2145.2	-465.832
7653.9	87760.8	285.1	79753.4	7253.9	34647.3	685.1	19409.7	7408.9	45196.1	530.1	35170.3	5793.9	44607.8	2145.1	702.055
7654	102167	285	94244.8	7254	30478	685	15255.6	7409	50809.6	530	40812.4	5794	45305.5	2145	1398.15
7654.1	119936	284.9	112098	7254.1	28871.4	684.9	13664	7409.1	56349.8	529.9	46380.9	5794.1	45395.1	2144.9	1485.77
7654.2	143885	284.8	136131	7254.2	28834.6	684.8	13642.1	7409.2	61290.3	529.8	51349.3	5794.2	44200.6	2144.8	288.985
7654.3	158797	284.7	151126	7254.3	27373.5	684.7	12195.8	7409.3	63799.4	529.7	53886	5794.3	45012.9	2144.7	1098.67
7654.4	170104	284.6	162515	7254.4	25568.8	684.6	10405.6	7409.4	65674	529.6	55787.9	5794.4	45357.6	2144.6	1440.42
7654.5	164439	284.5	156931	7254.5	23598.4	684.5	8449.56	7409.5	65424.1	529.5	55564.7	5794.5	43162.8	2144.5	-757.616
7654.6	148264	284.4	140836	7254.6	21452	684.4	6317.24	7409.6	62017.4	529.4	52184.4	5794.6	41057.4	2144.4	-2866.63
7654.7	121905	284.3	114555	7254.7	20929.8	684.3	5809.1	7409.7	54417.2	529.3	44610.3	5794.7	41262.1	2144.3	-2665.82
7654.8	87872.5	284.2	80600.8	7254.8	19728.4	684.2	4621.41	7409.8	48320.3	529.2	38538.8	5794.8	43931.9	2144.2	-0.23001
7654.9	62378.4	284.1	55183.2	7254.9	19149.8	684.1	4056.46	7409.9	43205	529.1	33448.7	5794.9	45260.5	2144.1	1323.83
7655	44415.1	284	37295.1	7255	18508.8	684	3428.88	7410	36003.1	529	26271.3	5795	44647.4	2144	705.997
7655.1	32645.3	283.9	25599.2	7255.1	17022.1	683.9	1955.45	7410.1	29902.7	528.9	20195	5795.1	46476.7	2143.9	2530.24
7655.2	24983.2	283.8	18009.7	7255.2	17613.7	683.8	2560.15	7410.2	25178.8	528.8	15494.8	5795.2	44766	2143.8	814.209
7655.3	21892.9	283.7	14990.6	7255.3	18192.7	683.7	3151.98	7410.3	20463.6	528.7	10802.7	5795.3	42690	2143.7	-1267.29
7655.4	16253.7	283.6	9421.23	7255.4	16850.6	683.6	1822.57	7410.4	16585.4	528.6	6947.07	5795.4	44372.3	2143.6	409.194
7655.5	13251.6	283.5	6487.42	7255.5	16221.2	683.5	1205.68	7410.5	15627.5	528.5	6011.12	5795.5	45403.3	2143.5	1434.17
7655.6	11327.8	283.4	4630.38	7255.6	15422.4	683.4	419.246	7410.6	13547.7	528.4	3952.72	5795.6	44667.8	2143.4	692.38
7655.7	9462.32	283.3	2830.1	7255.7	16839.5	683.3	1848.45	7410.7	11295.2	528.3	1721.12	5795.7	46195.7	2143.3	2213.83
7655.8	8604.61	283.2	2035.97	7255.8	16902.1	683.2	1922.98	7410.8	11431.9	528.2	1878.07	5795.8	44508.5	2143.2	519.928
7655.9	7712.8	283.1	1206.06	7255.9	15945.1	683.1	977.853	7410.9	9985.49	528.1	451.243	5795.9	45125.8	2143.1	1130.31
7656	6682.66	283	236.104	7256	15756.9	683	801.231	7411	9705.25	528	189.984	5796	45845.5	2143	1842.85
7656.1	7111.1	282.9	722.943	7256.1	15861.1	682.9	916.79	7411.1	9838.02	527.9	341.084	5796.1	45380.7	2142.9	1370.87
7656.2	6492.66	282.8	161.09	7256.2	15517.5	682.8	584.412	7411.2	9594.28	527.8	115.019	5796.2	43376.8	2142.8	-640.522
7656.3	6727.65	282.7	450.787	7256.3	16295.9	682.7	1373.89	7411.3	10190.1	527.7	727.855	5796.3	44425.4	2142.7	400.473
7656.4	6560.7	282.6	336.631	7256.4	15001.7	682.6	90.507	7411.4	10698.1	527.6	1252.12	5796.4	44941.7	2142.6	908.974
7656.5	6737.44	282.5	564.203	7256.5	14432.9	682.5	-467.599	7411.5	11000.9	527.5	1570.44	5796.5	45691	2142.5	1650.32
7656.6	6802.04	282.4	677.611	7256.6	15718.1	682.4	828.036	7411.6	11339.9	527.4	1924.34	5796.6	44300.1	2142.4	251.425
7656.7	6606.73	282.3	529.043	7256.7	15501.8	682.3	622.038	7411.7	10193.1	527.3	791.57	5796.7	43348.8	2142.3	-708.11
7656.8	6376.56	282.2	343.5	7256.8	15874.6	682.2	1005.04	7411.8	9742.43	527.2	354.267	5796.8	43291.3	2142.2	-773.916
7656.9	6065.34	282.1	74.7477	7256.9	14798.4	682.1	-61.2917	7411.9	9826.28	527.1	450.658	5796.9	42583.7	2142.1	-1489.97
7657	6297.13	282	346.876	7257	15870.4	682	1020.51	7412	10647.8	527	1283.93	5797	45248.3	2142	1166.15
7657.1	6346.43	281.9	434.429	7257.1	15394.9	681.9	554.541	7412.1	10017.1	526.9	664.187	5797.1	46413.8	2141.9	2322.97
7657.2	5654.17	281.8	-221.63	7257.2	15659	681.8	828.001	7412.2	10004.4	526.8	661.541	5797.2	43610.4	2141.8	-489.146
7657.3	6247.05	281.7	405.468	7257.3	14821.8	681.7	0	7412.3	9299.18	526.7	-34.3665	5797.3	44378.2	2141.7	269.895
7657.4	6478.58	281.6	669.267	7257.4	14584.2	681.6	-228.639	7412.4	10337.6	526.6	1012.43	5797.4	45127.9	2141.6	1010.74
7657.5	6047.87	281.5	268.92	7257.5	15078.1	681.5	274.093	7412.5	9901.07	526.5	583.468	5797.5	44157.9	2141.5	31.7305
7657.6	6166.57	281.4	416.129	7257.6	15659.1	681.4	863.675	7412.6	9407.58	526.4	96.6141	5797.6	44338.9	2141.4	203.814
7657.7	6786.53	281.3	1062.79	7257.7	15566.9	681.3	779.858	7412.7	10042.6	526.3	737.41	5797.7	43917.1	2141.3	-227.086
7657.8	5657.03	281.2	-41.7695	7257.8	15972.8	681.2	1193.93	7412.8	9437.59	526.2	137.162	5797.8	44130.8	2141.2	-22.415
7657.9	5535.69	281.1	-139.886	7257.9	15267.2	681.1	496.259	7412.9	10147.4	526.1	850.876	5797.9	44666.4	2141.1	504.145
7658	6029.89	281	375.868	7258	15065.5	681	302.26	7413	9585.75	526	292.099	5798	43769.6	2141	-401.782
7658.1	5868.9	280.9	234.818	7258.1	15031.1	680.9	275.267	7413.1	9928.55	525.9	636.836	5798.1	44180.5	2140.9	0
7658.2	5718.47	280.8	102.745	7258.2	15606.6	680.8	857.896	7413.2	9637.94	525.8	347.174	5798.2	45250.6	2140.8	1060.94
7658.3	6023.56	280.7	424.673	7258.3	15724.7	680.7	982.895	7413.3	9422.45	525.7	131.625	5798.3	44122.4	2140.7	-76.2959
7658.4	6291.08	280.6	707.543	7258.4	15560.1	680.6	824.902	7413.4	9189.72	525.6	-102.185	5798.4	44697.9	2140.6	490.067
7658.5	5546.9	280.5	-22.7203	7258.5	15958.7	680.5	1229.87	7413.5	9627.28	525.5	333.257	5798.5	44656.5	2140.5	439.605
7658.6	5712.03	280.4	154.937	7258.6	16334.7	680.4	1611.89	7413.6	9449.29	525.4	152.101	5798.6	45523.5	2140.4	1297.58
7658.7	6338.46	280.3	792.549	7258.7	16589.7	680.3	1872.63	7413.7	9665.19	525.3	363.756	5798.7	43622.2	2140.3	-612.721
7658.8	5423.48	280.2	-112.543	7258.8	15750	680.2	1038.29	7413.8	10227.5	525.2	920.734	5798.8	43968.8	2140.2	-274.971
7658.9	5494.94	280.1	-32.4374	7258.9	15451.2	680.1	744.566	7413.9	9313.19	525.1	0	5798.9	44187.5	2140.1	-65.2349
7659	6366.19	280	846.254	7259	15532.8	680	830.935	7414	9031.44	525	-289.268	5799	44000.7	2140	-260.782
7659.1	6075.31	279.9	561.661	7259.1	14592.4	679.9	-105.139	7414.1	9710.43	524.9	381.255
7659.2	5965.29	279.8	456.809	7259.2	14837.7	679.8	144.268	7414.2	8858.9	524.8	-479.536
7659.3	6108.64	279.7	604.281	7259.3	15245.6	679.7	555.832	7414.3	9372.61	524.7	24.2735
7659.4	5883.97	279.6	382.703	7259.4	14515.6	679.6	-170.934	7414.4	9118.19	524.6	-240.505
7659.5	5668.94	279.5	169.809	7259.5	14509.2	679.5	-174.394	7414.5	9412.69	524.5	43.3223
7659.6	6473.68	279.4	975.754	7259.6	16331.5	679.4	1650.44	7414.6	10747.9	524.4	1367.73
7659.7	6010.41	279.3	512.82	7259.7	16728	679.3	2049.01	7414.7	9768.06	524.3	377.099
7659.8	5339.42	279.2	-158.668	7259.8	15146	679.2	468.745	7414.8	8421.14	524.2	-980.42
7659.9	5332.78	279.1	-166.591	7259.9	15191.8	679.1	515.727	7414.9	8386.09	524.1	-1025.73
7660	5692.87	279	191.486	7260	14089	679	-586.199	7415	9700	524	278.431
7660.1	6252.44	278.9	748.353	7260.1	15928.8	678.9	1254.05	7415.1	9231.68	523.9	-198.973
7660.2	6530.49	278.8	1023.05	7260.2	16652.4	678.8	1977.51	7415.2	8787.14	523.8	-651.757
7660.3	6074.16	278.7	562.778	7260.3	15763.8	678.7	1088.4	7415.3	9099.71	523.7	-346.43
7660.4	6226.33	278.6	710.458	7260.4	14676.4	678.6	0	7415.4	9411.84	523.6	-40.3884
7660.5	6110.05	278.5	589.185	7260.5	13122.9	678.5	-1554.89	7415.5	10021.6	523.5	564.598
7660.6	5927.61	278.4	401.303	7260.6	13925.1	678.4	-754.637	7415.6	9088.74	523.4	-371.539
7660.7	5447.43	278.3	-84.7379	7260.7	14292.6	678.3	-389.568	7415.7	9248.27	523.3	-213.644
7660.8	5399.62	278.2	-138.774	7260.8	14521.5	678.2	-163.547	7415.8	10044.5	523.2	582.789
7660.9	5508.7	278.1	-36.233	7260.9	16265.3	678.1	1576.99	7415.9	9387.63	523.1	-71.9595
7661	5482.93	278	-68.8122	7261	16420.1	678	1727.94	7416	9181.27	523	-274.03
7661.1	5809.22	277.9	250.421	7261.1	14752.6	677.9	56.3215	7416.1	9554.76	522.9	105.941
7661.2	5596.44	277.8	30.3284	7261.2	14072.1	677.8	-628.914	7416.2	9349.77	522.8	-90.5024
7661.3	5414.27	277.7	-159.389	7261.3	14880.9	677.7	174.828	7416.3	8920.79	522.7	-509.008
7661.4	5041.02	277.6	-540.405	7261.4	14414.9	677.6	-296.63	7416.4	8643.62	522.6	-773.935
7661.5	5238.92	277.5	-350.499	7261.5	13352.6	677.5	-1364.9	7416.5	8936.79	522.5	-466.913
7661.6	5336.31	277.4	-261.315	7261.6	13965.2	677.4	-758.609	7416.6	9175.66	522.4	-212.718
7661.7	6208.14	277.3	602.104	7261.7	15368.4	677.3	637.777	7416.7	8950.46	522.3	-421.281
7661.8	5870.09	277.2	255.449	7261.8	15859.1	677.2	1121.35	7416.8	8998.24	522.2	-355.714
7661.9	6127.04	277.1	503.617	7261.9	14736.8	677.1	-8.51184	7416.9	9484.09	522.1	148.944
7662	5676.63	277	44.2366	7262	14893.3	677	140.064	7417	8876.24	522	-439.234
7662.1	5851.34	276.9	209.818	7262.1	15450.6	676.9	689.028	7417.1	8862.6	521.9	-432.506
7662.2	5871.18	276.8	220.366	7262.2	16070	676.8	1299.77	7417.2	8900.92	521.8	-373.253
7662.3	5678.75	276.7	18.4846	7262.3	15379.4	676.7	600.159	7417.3	9055.48	521.7	-197.356
7662.4	5489.85	276.6	-180.01	7262.4	15159.2	676.6	370.506	7417.4	9589.81	521.6	358.558
7662.5	5931.49	276.5	251.908	7262.5	15002	676.5	203.493	7417.5	9844.93	521.5	635.368
7662.6	5882.99	276.4	193.551	7262.6	15091.1	676.4	282.424	7417.6	9583.32	521.4	395.393
7662.7	6198.98	276.3	499.578	7262.7	15349.3	676.3	530.143	7417.7	9228.83	521.3	62.3481
7662.8	5578.05	276.2	-131.438	7262.8	14977.3	676.2	147.32	7417.8	9361.24	521.2	215.837
7662.9	5386.55	276.1	-333.114	7262.9	15030.1	676.1	188.98	7417.9	9685.04	521.1	560.225
7663	6050.74	276	320.801	7263	14912.3	676	59.6499	7418	8908.27	521	-196.628
7663.1	6166.98	275.9	426.674	7263.1	14687.8	675.9	-176.734	7418.1	9728.43	520.9	642.65
7663.2	5351.28	275.8	-399.461	7263.2	15911.7	675.8	1035.03	7418.2	9671.61	520.8	603.992
7663.3	5608.95	275.7	-152.295	7263.3	15885.3	675.7	996.17	7418.3	9885.07	520.7	834.505
7663.4	5700.71	275.6	-71.0955	7263.4	15780.5	675.6	878.696	7418.4	10152.5	520.6	1117.69
7663.5	5162.06	275.5	-620.361	7263.5	14923.4	675.5	8.46382	7418.5	10293.4	520.5	1272.99
7663.6	5633.76	275.4	-159.315	7263.6	15663.4	675.4	735.184	7418.6	9670.96	520.4	663.376
7663.7	6419.28	275.3	615.517	7263.7	15806.1	675.3	864.2	7418.7	9488.19	520.3	491.7
7663.8	5474.65	275.2	-339.827	7263.8	14644	675.2	-311.764	7418.8	10226.3	520.2	1239.03
7663.9	6315.42	275.1	490.208	7263.9	14153.9	675.1	-816.112	7418.9	10052.4	520.1	1072.33
7664	5835.95	275	0	7264	15020.2	675	35.7187	7419	9582.92	520	607.913
				7264.1	16476.4	674.9	1477.22
				7264.2	15251.4	674.8	237.171
				7264.3	15222.8	674.7	193.407
				7264.4	15837.3	674.6	792.348
				7264.5	15528.4	674.5	467.704
				7264.6	14978.9	674.4	-97.6786
				7264.7	14971.7	674.3	-121.077
				7264.8	15238.6	674.2	129.428
				7264.9	15886.1	674.1	760.306
				7265	14950.3	674	-192.329
				7265.1	14070.5	673.9	-1089.17
				7265.2	14387.7	673.8	-789.276
				7265.3	15728.4	673.7	534.029
				7265.4	15936.6	673.6	724.676
				7265.5	15509.6	673.5	279.835
				7265.6	14870.8	673.4	-376.96
				7265.7	14445.3	673.3	-820.568
				7265.8	14612.6	673.2	-671.563
				7265.9	14809.6	673.1	-493.026
				7266	14973.5	673	-347.737
				7266.1	14978	672.9	-361.932
				7266.2	15282.5	672.8	-76.3116
				7266.3	15474.1	672.7	96.2365
				7266.4	15146.5	672.6	-250.523
				7266.5	14437	672.5	-979.267
				7266.6	14970.2	672.4	-465.446
				7266.7	14676.5	672.3	-778.573
				7266.8	14307.1	672.2	-1167.61
				7266.9	16193.8	672.1	699.446
				7267	16245.8	672	731.666
				7267.1	15080.2	671.9	-453.86
				7267.2	15400.3	671.8	-153.606
				7267.3	14655.5	671.7	-918.469
				7267.4	14970.2	671.6	-623.842
				7267.5	15250.5	671.5	-363.602
				7267.6	14911	671.4	-723.365
				7267.7	15067.6	671.3	-586.919
				7267.8	15083.3	671.2	-591.558
				7267.9	15455.8	671.1	-239.322
				7268	15219	671	-496.493
				7268.1	14366.4	670.9	-1369.43
				7268.2	14295.3	670.8	-1460.95
				7268.3	15452	670.7	-324.631
				7268.4	15797	670.6	0
				7268.5	16467.1	670.5	649.668
				7268.6	15945	670.4	107.131
				7268.7	15093.1	670.3	-765.056
				7268.8	14726	670.2	-1152.57
				7268.9	14774.7	670.1	-1124.19
				7269	15463.2	670	-456.061

## Sheet: NMC111-soak
This file contains the raw data (intensity as a function of kinetic energy) and the processed data (intensity as a function of binding energy, normalised when necessary), with each tab corresponding to a different material, arranged in the same order and labeled using the abbreviations listed in Table S1.
Supplementary Information for: X‑Ray Photoelectron Spectroscopy Analysis of Reference Compounds for Studying Rechargeable Li‑, Na‑, and K‑ion Batteries
C1s				F1s				O1s				P1s
Raw data		Processed data		Raw data		Processed data		Raw data		Processed data		Raw data		Processed data
Kinetic energy / eV	Intensity / a.u.	Binding energy / eV	Intensity / a.u.	Kinetic energy / eV	Intensity / a.u.	Binding energy / eV	Intensity / a.u.	Kinetic energy / eV	Intensity / a.u.	Binding energy / eV	Intensity / a.u.	Kinetic energy / eV	Intensity / a.u.	Binding energy / eV	Intensity / a.u.
7639	8712.8	300	0	7239	19296.6	700	0	7394	12276.4	545	-879.481	5779	45993.3	2160	-718.078
7639.1	8531.69	299.9	-168.506	7239.1	19134.9	699.9	-93.9348	7394.1	12604.1	544.9	-521.358	5779.1	45993.5	2159.9	-728.52
7639.2	8321.16	299.8	-366.422	7239.2	19409.4	699.8	248.212	7394.2	12366.8	544.8	-727.427	5779.2	46057.9	2159.8	-674.785
7639.3	8384.83	299.7	-290.133	7239.3	19636.4	699.7	542.714	7394.3	13150.1	544.7	87.782	5779.3	47034.2	2159.7	290.843
7639.4	8914.88	299.6	252.537	7239.4	18930.9	699.6	-95.3518	7394.4	13518.9	544.6	489.037	5779.4	46912.1	2159.6	158.033
7639.5	9037.62	299.5	387.91	7239.5	18604.5	699.5	-354.528	7394.5	12874.2	544.5	-122.746	5779.5	47470.8	2159.5	706.051
7639.6	7880.26	299.4	-756.813	7239.6	17940	699.4	-952.165	7394.6	12794.2	544.4	-169.429	5779.6	48342.7	2159.4	1567.37
7639.7	8154.46	299.3	-469.958	7239.7	19543.3	699.3	717.78	7394.7	12663.5	544.3	-266.649	5779.7	50298.7	2159.3	3512.72
7639.8	8566.01	299.2	-45.7408	7239.8	19576.7	699.2	817.435	7394.8	12425.8	544.2	-470.736	5779.8	48430.9	2159.2	1634.34
7639.9	8803.37	299.1	204.298	7239.9	20077.8	699.1	1384.38	7394.9	13264.9	544.1	401.979	5779.9	46493.3	2159.1	-313.745
7640	8841.33	299	254.962	7240	18765.7	699	137.647	7395	14085.6	544	1256.21	5780	46919.9	2159	102.38
7640.1	8529.52	298.9	-44.1223	7240.1	18452.7	698.9	-110.46	7395.1	13045.4	543.9	249.342	5780.1	47077	2158.9	249.103
7640.2	8577.02	298.8	16.1144	7240.2	19061.1	698.8	562.241	7395.2	13288.4	543.8	525.372	5780.2	46612.3	2158.8	-225.9
7640.3	8086.71	298.7	-461.418	7240.3	19045.3	698.7	610.065	7395.3	14327.7	543.7	1597.27	5780.3	47003	2158.7	154.615
7640.4	8232.26	298.6	-303.073	7240.4	18993.5	698.6	621.304	7395.4	13758.6	543.6	1060.23	5780.4	48459.4	2158.6	1600.94
7640.5	8865.96	298.5	343.454	7240.5	18169	698.5	-140.933	7395.5	13562.9	543.5	895.881	5780.5	49252.4	2158.5	2383.89
7640.6	8554.53	298.4	44.8761	7240.6	17091.7	698.4	-1156.74	7395.6	13401.2	543.4	764.76	5780.6	48102	2158.4	1223.63
7640.7	7936.68	298.3	-560.08	7240.7	17772.1	698.3	-415.719	7395.7	13031.1	543.3	424.451	5780.7	46443.2	2158.3	-444.833
7640.8	7753	298.2	-730.838	7240.8	17498.2	698.2	-629.821	7395.8	13364.5	543.2	786.605	5780.8	47524.3	2158.2	626.596
7640.9	8093.5	298.1	-377.373	7240.9	18419.4	698.1	350.226	7395.9	13153.2	543.1	603.026	5780.9	47581.7	2158.1	674.61
7641	8073.88	298	-383.993	7241	18462	698	450.647	7396	14615.3	543	2091.55	5781	47523.3	2158	606.941
7641.1	7855.2	297.9	-589.626	7241.1	17781.6	697.9	-172.927	7396.1	14409.9	542.9	1911.36	5781.1	48273.4	2157.9	1347.94
7641.2	8509.6	297.8	77.8589	7241.2	18117.7	697.8	218.953	7396.2	12902.4	542.8	427.552	5781.2	47201.9	2157.8	267.576
7641.3	8139.74	297.7	-278.866	7241.3	18579.2	697.7	735.056	7396.3	12961.6	542.7	508.964	5781.3	47284.8	2157.7	341.764
7641.4	7970.08	297.6	-435.344	7241.4	18428.6	697.6	637.834	7396.4	12955.4	542.6	523.309	5781.4	48377.3	2157.6	1425.79
7641.5	8392.2	297.5	0	7241.5	17098.4	697.5	-640.2	7396.5	12771	542.5	357.742	5781.5	49227.5	2157.5	2267.65
7641.6	8093.45	297.4	-285.507	7241.6	17371.2	697.4	-316.546	7396.6	13227.2	542.4	830.807	5781.6	46630.7	2157.4	-337.184
7641.7	7969.64	297.3	-396.257	7241.7	17605.1	697.3	-33.1513	7396.7	12940.7	542.3	559.301	5781.7	49470.7	2157.3	2495.03
7641.8	7645.93	297.2	-707.32	7241.8	17237.6	697.2	-352.587	7396.8	12876.9	542.2	508.35	5781.8	48289	2157.2	1305.69
7641.9	8646.91	297.1	305.659	7241.9	17721.1	697.1	177.565	7396.9	12511.4	542.1	153.558	5781.9	47903	2157.1	912.378
7642	8260.83	297	-69.3169	7242	18250.9	697	752.542	7397	12692.2	542	342.644	5782	48142.8	2157	1145.13
7642.1	8155.53	296.9	-164.622	7242.1	17454.8	696.9	0	7397.1	12431.9	541.9	88.3159	5782.1	45988.5	2156.9	-1015.91
7642.2	7413.93	296.8	-897.581	7242.2	16719.2	696.8	-693.61	7397.2	12397.2	541.8	57.0988	5782.2	47273.5	2156.8	262.517
7642.3	8039.22	296.7	-265.232	7242.3	16531.2	696.7	-841.236	7397.3	11641.7	541.7	-697.338	5782.3	47283.2	2156.7	266.096
7642.4	7861.86	296.6	-437.348	7242.4	17782.9	696.6	449.03	7397.4	12153.9	541.6	-185.925	5782.4	46205.3	2156.6	-817.74
7642.5	7330.03	296.5	-965.996	7242.5	17474.1	696.5	177.009	7397.5	12053.3	541.5	-288.974	5782.5	48016.9	2156.5	988.282
7642.6	7511.02	296.4	-784.103	7242.6	17643.8	696.4	381.598	7397.6	11907.4	541.4	-438.579	5782.6	48356	2156.4	1322.04
7642.7	7941.25	296.3	-355.492	7242.7	18151.9	696.3	922.695	7397.7	12337.8	541.3	-12.7397	5782.7	45932.8	2156.3	-1106.12
7642.8	7505.54	296.2	-795.581	7242.8	18212.4	696.2	1014.17	7397.8	11989.5	541.2	-366.047	5782.8	48122.4	2156.2	1078.71
7642.9	8710.71	296.1	402.225	7242.9	16730	696.1	-439.272	7397.9	12918.2	541.1	557.532	5782.9	48227.2	2156.1	1178.98
7643	7608.6	296	-710.469	7243	17189.8	696	47.2943	7398	13573.7	541	1208.06	5783	48210.5	2156	1158.12
7643.1	7551.18	295.9	-781.921	7243.1	16753.4	695.9	-364.398	7398.1	12848	540.9	478.031	5783.1	48599.5	2155.9	1543.24
7643.2	8047.86	295.8	-302.731	7243.2	17066.6	695.8	-28.8835	7398.2	12577.8	540.8	204.508	5783.2	49208.3	2155.8	2148.35
7643.3	8577.4	295.7	206.074	7243.3	16310.4	695.7	-764.948	7398.3	12417.2	540.7	41.8718	5783.3	48266	2155.7	1202.62
7643.4	8003.29	295.6	-391.811	7243.4	16113.5	695.6	-944.2	7398.4	12879.4	540.6	503.722	5783.4	49285.6	2155.6	2219.1
7643.5	8177.55	295.5	-244.118	7243.5	17009.5	695.5	-32.863	7398.5	12381.8	540.5	7.76649	5783.5	51802.3	2155.5	4732.83
7643.6	7779.47	295.4	-671.354	7243.6	16415.4	695.4	-614.183	7398.6	12850.2	540.4	480.35	5783.6	51234.3	2155.4	4162.18
7643.7	7216.03	295.3	-1266.32	7243.7	16862.2	695.3	-157.282	7398.7	13098.8	540.3	735.882	5783.7	49525.3	2155.3	2450.77
7643.8	7636.78	295.2	-879.237	7243.8	15466.1	695.2	-1545.74	7398.8	13278.3	540.2	925.422	5783.8	49538.4	2155.2	2461.69
7643.9	8190.81	295.1	-360.783	7243.9	16909.6	695.1	-97.4293	7398.9	12339.3	540.1	0	5783.9	51999.3	2155.1	4920.62
7644	8234.17	295	-354.699	7244	17004.9	695	0	7399	12510.8	540	188.889	5784	51481.7	2155	4401.28
7644.1	8761.48	294.9	133.854	7244.1	17136.6	694.9	131.076	7399.1	13007.8	539.9	706.924	5784.1	50493.5	2154.9	3411.5
7644.2	9498.9	294.8	831.262	7244.2	17563.2	694.8	554.324	7399.2	12531.6	539.8	255.217	5784.2	52004.1	2154.8	4920.75
7644.3	9615.58	294.7	906.902	7244.3	17030.5	694.7	15.7854	7399.3	12278.8	539.7	29.9278	5784.3	53538	2154.7	6453.61
7644.4	9039.61	294.6	289.078	7244.4	16823.8	694.6	-199.133	7399.4	12331.9	539.6	113.505	5784.4	54478.1	2154.6	7392.8
7644.5	9308.32	294.5	515.347	7244.5	16935.5	694.5	-97.8919	7399.5	11782.1	539.5	-403.138	5784.5	54528.6	2154.5	7442.55
7644.6	9431.07	294.4	595.282	7244.6	17697	694.4	651.181	7399.6	12375.7	539.4	226.132	5784.6	53995.5	2154.4	6908.97
7644.7	9644.84	294.3	766.094	7244.7	18005	694.3	944.809	7399.7	12452.7	539.3	340.91	5784.7	54768.3	2154.3	7681.43
7644.8	9464.2	294.2	542.575	7244.8	16870.8	694.2	-205.515	7399.8	12156.9	539.2	84.7542	5784.8	54220.8	2154.2	7133.8
7644.9	9182.53	294.1	218.326	7244.9	16212.9	694.1	-881.162	7399.9	11978.4	539.1	-52.2869	5784.9	55811.9	2154.1	8724.93
7645	8322.48	294	-683.798	7245	15933.6	694	-1179.66	7400	11232.9	539	-754.919	5785	56617.6	2154	9530.79
7645.1	8678.92	293.9	-368.682	7245.1	18413.2	693.9	1279.47	7400.1	13294.8	538.9	1351.06	5785.1	58124.5	2153.9	11038.1
7645.2	9052.03	293.8	-35.9269	7245.2	17871.8	693.8	716.493	7400.2	12827.9	538.8	929.237	5785.2	54280	2153.8	7194.13
7645.3	9829.43	293.7	702.291	7245.3	18396.1	693.7	1218.23	7400.3	12319.5	538.7	466.592	5785.3	54605.4	2153.7	7520.21
7645.4	10397.4	293.6	1232.53	7245.4	17729.9	693.6	528.555	7400.4	11966.8	538.6	160.16	5785.4	58015.1	2153.6	10930.7
7645.5	10526	293.5	1324.98	7245.5	17305.6	693.5	80.2056	7400.5	12037	538.5	276.899	5785.5	57139.8	2153.5	10056.5
7645.6	9471.99	293.4	236.64	7245.6	17946.6	693.4	696.578	7400.6	11411.3	538.4	-302.25	5785.6	57945.1	2153.4	10862.9
7645.7	9248.73	293.3	-18.8421	7245.7	18172.4	693.3	897.372	7400.7	12500	538.3	832.705	5785.7	55865.9	2153.3	8785.05
7645.8	9198.51	293.2	-98.9998	7245.8	17918.6	693.2	618.356	7400.8	11991.7	538.2	370.142	5785.8	56736.7	2153.2	9657.31
7645.9	9171.81	293.1	-153.125	7245.9	18046.4	693.1	720.926	7400.9	10638.3	538.1	-938.227	5785.9	58138.2	2153.1	11060.3
7646	8820.04	293	-529.573	7246	17038.6	693	-312.083	7401	10804.4	538	-728.007	5786	59354.3	2153	12278.1
7646.1	9727.08	292.9	355.739	7246.1	18198.6	692.9	822.923	7401.1	12197.2	537.9	707.798	5786.1	57433.2	2152.9	10358.8
7646.2	9491.65	292.8	101.644	7246.2	17537.2	692.8	136.999	7401.2	12308.3	537.8	860.872	5786.2	59659	2152.8	12586.5
7646.3	10209	292.7	803.39	7246.3	17250.8	692.7	-173.5	7401.3	11630.4	537.7	223.868	5786.3	60383.1	2152.7	13312.6
7646.4	10216.9	292.6	798.582	7246.4	18005.2	692.6	557.645	7401.4	12137.3	537.6	770.66	5786.4	58145.6	2152.6	11077.3
7646.5	10356.7	292.5	928.724	7246.5	17429.4	692.5	-40.6754	7401.5	12625.1	537.5	1297.23	5786.5	60465.2	2152.5	13399.1
7646.6	10620.4	292.4	1185.51	7246.6	17325.3	692.4	-166.18	7401.6	12632	537.4	1341.97	5786.6	59312.2	2152.4	12248.4
7646.7	10042	292.3	603.067	7246.7	17074.5	692.3	-437.332	7401.7	12116.1	537.3	863.004	5786.7	59741	2152.3	12679.7
7646.8	10348.6	292.2	908.491	7246.8	17530.8	692.2	0	7401.8	11989.8	537.2	772.533	5786.8	58198.7	2152.2	11139.9
7646.9	10959.4	292.1	1520.79	7246.9	18129	692.1	580.604	7401.9	11575.9	537.1	393.585	5786.9	57615	2152.1	10558.8
7647	11699.4	292	2264.93	7247	18582.8	692	1018.26	7402	12533.8	537	1385.46	5787	57414.2	2152	10360.7
7647.1	11816	291.9	2388.25	7247.1	19458.8	691.9	1879.58	7402.1	12951.2	536.9	1835.99	5787.1	56701.1	2151.9	9650.25
7647.2	11771.6	291.8	2353.26	7247.2	17847.8	691.8	255.281	7402.2	12213.9	536.8	1130.82	5787.2	58209.8	2151.8	11161.8
7647.3	11045.6	291.7	1639.06	7247.3	17703.4	691.7	98.9911	7402.3	12535.8	536.7	1484.01	5787.3	58354.1	2151.7	11308.9
7647.4	12936.9	291.6	3544.73	7247.4	18248.2	691.6	633.25	7402.4	12325	536.6	1303.58	5787.4	56744	2151.6	9701.79
7647.5	14240.2	291.5	4864.84	7247.5	18201	691.5	576.812	7402.5	12459.3	536.5	1467.36	5787.5	56393.8	2151.5	9354.6
7647.6	14109.9	291.4	4753.63	7247.6	18486.5	691.4	854.459	7402.6	12486.1	536.4	1522.9	5787.6	56165.9	2151.4	9129.7
7647.7	15178.4	291.3	5843.63	7247.7	19111.5	691.3	1472.87	7402.7	13065.8	536.3	2130.44	5787.7	58019	2151.3	10985.9
7647.8	15351.7	291.2	6040.68	7247.8	18979.9	691.2	1335.99	7402.8	13325.4	536.2	2417.07	5787.8	57725.3	2151.2	10695.2
7647.9	16049.4	291.1	6764.28	7247.9	19867.3	691.1	2219.33	7402.9	13158.1	536.1	2275.99	5787.9	56109.9	2151.1	9083.01
7648	16735.3	291	7478.32	7248	19956.5	691	2305.84	7403	13813.3	536	2956.68	5788	56481.3	2151	9457.52
7648.1	17260.8	290.9	8034.09	7248.1	19427.2	690.9	1774.94	7403.1	13438.1	535.9	2606.13	5788.1	56307.6	2150.9	9287.08
7648.2	18106.4	290.8	8912.02	7248.2	19691.7	690.8	2039.07	7403.2	14739.6	535.8	3931.63	5788.2	56520.8	2150.8	9503.48
7648.3	17713.4	290.7	8553.3	7248.3	21364	690.7	3712.22	7403.3	13958.4	535.7	3173.67	5788.3	57405.1	2150.7	10391
7648.4	18013.3	290.6	8889.54	7248.4	22989.8	690.6	5340.01	7403.4	13365.3	535.6	2603.04	5788.4	56105.2	2150.6	9094.31
7648.5	18391.9	290.5	9306.32	7248.5	21923.9	690.5	4277.27	7403.5	14033.5	535.5	3292.99	5788.5	55570.1	2150.5	8562.5
7648.6	17296.4	290.4	8250.95	7248.6	23975.5	690.4	6333.18	7403.6	13978.2	535.4	3258.8	5788.6	54877.5	2150.4	7873.12
7648.7	16471	290.3	7467.42	7248.7	26529.1	690.3	8892.19	7403.7	13876.5	535.3	3177.48	5788.7	54553.9	2150.3	7552.68
7648.8	16481.5	290.2	7521.59	7248.8	27802.2	690.2	10171.7	7403.8	13404.7	535.2	2725.48	5788.8	54322.7	2150.2	7324.75
7648.9	15483	290.1	6568.45	7248.9	29056.3	690.1	11433.4	7403.9	13964.3	535.1	3304.14	5788.9	52192.2	2150.1	5197.39
7649	14383.1	290	5515.65	7249	32634.8	690	15020.4	7404	15402.4	535	4760.8	5789	50717.8	2150	3726.22
7649.1	13869.7	289.9	5050.83	7249.1	35119.9	689.9	17515.2	7404.1	15206.4	534.9	4582.7	5789.1	54054	2149.9	7065.59
7649.2	13266.8	289.8	4498.21	7249.2	36729.1	689.8	19135	7404.2	15226.4	534.8	4619.98	5789.2	53528.9	2149.8	6543.62
7649.3	12085.1	289.7	3368.23	7249.3	40740	689.7	23157.6	7404.3	15965.8	534.7	5376.07	5789.3	53699.2	2149.7	6716.99
7649.4	12140.3	289.6	3476.57	7249.4	44523.2	689.6	26953.3	7404.4	15915.7	534.6	5342.1	5789.4	51828.3	2149.6	4849.18
7649.5	12596.8	289.5	3987.76	7249.5	49617.2	689.5	32060.9	7404.5	16588.8	534.5	6030.79	5789.5	51726.8	2149.5	4750.69
7649.6	11710.2	289.4	3157.1	7249.6	56522.2	689.4	38980.4	7404.6	16443.2	534.4	5900.24	5789.6	52467.2	2149.4	5494.01
7649.7	11938	289.3	3442.15	7249.7	63597.5	689.3	46071	7404.7	16613.2	534.3	6084.84	5789.7	52506.1	2149.3	5535.77
7649.8	12871.3	289.2	4433.99	7249.8	67675.8	689.2	50165.6	7404.8	17228.5	534.2	6714.21	5789.8	50498.2	2149.2	3530.72
7649.9	12966.7	289.1	4589.15	7249.9	72815.5	689.1	55322.5	7404.9	17571.5	534.1	7070.78	5789.9	49625.4	2149.1	2660.75
7650	12815.6	289	4498.99	7250	79376	689	61900.9	7405	17883	534	7395.29	5790	51030.8	2149	4068.8
7650.1	12721.1	288.9	4466.48	7250.1	88351.8	688.9	70895.5	7405.1	17006.8	533.9	6531.75	5790.1	51170	2148.9	4210.7
7650.2	13644.6	288.8	5453.05	7250.2	97374.9	688.8	79938.3	7405.2	16547.5	533.8	6084.69	5790.2	50651.9	2148.8	3695.12
7650.3	13963.2	288.7	5835.72	7250.3	101682	688.7	84265.3	7405.3	18460.7	533.7	8009.67	5790.3	50972.2	2148.7	4017.96
7650.4	13195	288.6	5132.62	7250.4	106718	688.6	89323.3	7405.4	18080.9	533.6	7641.26	5790.4	49848.7	2148.6	2896.83
7650.5	13165.1	288.5	5168.68	7250.5	113093	688.5	95720.3	7405.5	18807.6	533.5	8378.91	5790.5	48350.8	2148.5	1401.18
7650.6	13622.8	288.4	5693.18	7250.6	119398	688.4	102048	7405.6	18522.9	533.4	8104.87	5790.6	48551.4	2148.4	1603.96
7650.7	14312.7	288.3	6450.62	7250.7	123909	688.3	106582	7405.7	18222.6	533.3	7814.78	5790.7	49158.9	2148.3	2213.6
7650.8	13838.6	288.2	6044.97	7250.8	134804	688.2	117501	7405.8	18126.3	533.2	7728.4	5790.8	48469.9	2148.2	1526.58
7650.9	13651.9	288.1	5927.27	7250.9	139768	688.1	122489	7405.9	18443.7	533.1	8055.42	5790.9	47387.5	2148.1	445.985
7651	14499.6	288	6844.72	7251	141562	688	124309	7406	19883.8	533	9504.78	5791	49095.6	2148	2155.9
7651.1	15191.5	287.9	7606.98	7251.1	146694	687.9	129467	7406.1	19860.1	532.9	9490.05	5791.1	48426.4	2147.9	1488.31
7651.2	14688.7	287.8	7175.03	7251.2	143510	687.8	126310	7406.2	19195.6	532.8	8834.18	5791.2	48596.6	2147.8	1660.04
7651.3	15266.8	287.7	7824.53	7251.3	145768	687.7	128595	7406.3	20529.6	532.7	10176.6	5791.3	48614	2147.7	1678.78
7651.4	17150.9	287.6	9780.4	7251.4	144225	687.6	127080	7406.4	20574.4	532.6	10229.6	5791.4	49630	2147.6	2696.04
7651.5	16227.6	287.5	8929.32	7251.5	139634	687.5	122517	7406.5	21743.3	532.5	11406.5	5791.5	47330.8	2147.5	397.908
7651.6	16575.1	287.4	9349.5	7251.6	135393	687.4	118305	7406.6	21851	532.4	11521.9	5791.6	48990	2147.4	2058.04
7651.7	16453.7	287.3	9300.97	7251.7	130501	687.3	113442	7406.7	22484.3	532.3	12162.6	5791.7	49836.6	2147.3	2905.44
7651.8	17802.9	287.2	10723.3	7251.8	123629	687.2	106600	7406.8	22844.1	532.2	12529.8	5791.8	47928.3	2147.2	997.809
7651.9	18614.4	287.1	11608.1	7251.9	118633	687.1	101635	7406.9	22858.6	532.1	12551.4	5791.9	47771.6	2147.1	841.528
7652	19325.7	287	12392.9	7252	112207	687	95240.1	7407	24631.4	532	14331.2	5792	46483.5	2147	-446.24
7652.1	20272	286.9	13412.7	7252.1	104395	686.9	87459.2	7407.1	24355.3	531.9	14062.1	5792.1	46119.2	2146.9	-810.434
7652.2	21348.4	286.8	14562.8	7252.2	97861.1	686.8	80956.8	7407.2	25438.4	531.8	15151.9	5792.2	47017.3	2146.8	87.6503
7652.3	23049.7	286.7	16337.8	7252.3	91883	686.7	75010.8	7407.3	26696.9	531.7	16417.1	5792.3	49568.5	2146.7	2638.63
7652.4	25074.1	286.6	18435.7	7252.4	84795.9	686.6	67956.1	7407.4	27420	531.6	17146.7	5792.4	47479.6	2146.6	549.329
7652.5	24688.6	286.5	18123.7	7252.5	80368.6	686.5	63561.6	7407.5	25910	531.5	15643.1	5792.5	47488.9	2146.5	558.061
7652.6	27772.4	286.4	21280.8	7252.6	76039.5	686.4	59265.7	7407.6	25289.5	531.4	15028.9	5792.6	48577.9	2146.4	1646.27
7652.7	29224.2	286.3	22805.7	7252.7	71448.9	686.3	54708.5	7407.7	24894.2	531.3	14640.1	5792.7	48789.2	2146.3	1856.55
7652.8	30776	286.2	24430.3	7252.8	69270.8	686.2	52564.3	7407.8	25724.5	531.2	15476.7	5792.8	47292.6	2146.2	358.728
7652.9	30589.5	286.1	24316.4	7252.9	69769.9	686.1	53097.4	7407.9	26182.3	531.1	15940.8	5792.9	48779.9	2146.1	1844.65
7653	32307.2	286	26106.3	7253	66625.6	686	49987.4	7408	25509.8	531	15274.6	5793	48138.5	2146	1201.63
7653.1	33391	285.9	27261.9	7253.1	65129.2	685.9	48525.5	7408.1	23867	530.9	13638.1	5793.1	47434.1	2145.9	495.4
7653.2	34495.5	285.8	28437.7	7253.2	60566.9	685.8	43997.9	7408.2	24649.1	530.8	14426.5	5793.2	47986.3	2145.8	1045.54
7653.3	36128.7	285.7	30141.7	7253.3	58753.7	685.7	42219.7	7408.3	25095.7	530.7	14879.6	5793.3	46883.4	2145.7	-59.7227
7653.4	37138.1	285.6	31221.4	7253.4	57500.1	685.6	41001.2	7408.4	26156.2	530.6	15946.5	5793.4	45908.4	2145.6	-1037.18
7653.5	38231.7	285.5	32384.7	7253.5	53572.4	685.5	37108.8	7408.5	28602.8	530.5	18399.7	5793.5	45867.8	2145.5	-1080.57
7653.6	40350.7	285.4	34572.6	7253.6	47734.9	685.4	31306.7	7408.6	32226.2	530.4	22029.8	5793.6	45421.3	2145.4	-1530.09
7653.7	43671.2	285.3	37961.4	7253.7	45845.5	685.3	29452.9	7408.7	36427.3	530.3	26237.6	5793.7	46992.1	2145.3	37.3905
7653.8	48991.2	285.2	43349	7253.8	42608.8	685.2	26251.8	7408.8	40605.4	530.2	30422.6	5793.8	46218	2145.2	-740.196
7653.9	58912.9	285.1	53337.4	7253.9	42571.6	685.1	26250.4	7408.9	45562.5	530.1	35386.7	5793.9	46946.5	2145.1	-15.4224
7654	69804.5	285	64294.8	7254	40302.3	685	24016.8	7409	49675.7	530	39507	5794	46149.3	2145	-816.726
7654.1	80217	284.9	74772.2	7254.1	37016.7	684.9	20767.1	7409.1	53937.4	529.9	43776.1	5794.1	47297.1	2144.9	326.844
7654.2	93899	284.8	88518.2	7254.2	32955.7	684.8	16741.9	7409.2	58358.3	529.8	48204.5	5794.2	48093.5	2144.8	1118.59
7654.3	103383	284.7	98065.1	7254.3	30072.7	684.7	13894.8	7409.3	61793.6	529.7	51647.6	5794.3	46525.1	2144.7	-454.634
7654.4	104694	284.6	99437.8	7254.4	28852.3	684.6	12710.1	7409.4	62039.1	529.6	51901	5794.4	48248.4	2144.6	1263.63
7654.5	97602.3	284.5	92407.2	7254.5	26436.2	684.5	10329.9	7409.5	59280.3	529.5	49150.4	5794.5	48973.7	2144.5	1983.59
7654.6	83062.8	284.4	77927.2	7254.6	25295.7	684.4	9225.11	7409.6	54099.1	529.4	43977.7	5794.6	46643.5	2144.4	-352.276
7654.7	67256.2	284.3	62179.1	7254.7	22555	684.3	6520.06	7409.7	49580	529.3	39467.3	5794.7	46915.3	2144.3	-86.3306
7654.8	51862.3	284.2	46842.3	7254.8	20019	684.2	4019.53	7409.8	45502.4	529.2	35398.7	5794.8	46974.6	2144.2	-33.0374
7654.9	36191.5	284.1	31227.3	7254.9	20301.5	684.1	4337.51	7409.9	39386.1	529.1	29291.7	5794.9	47436.2	2144.1	422.221
7655	25959.4	284	21049.6	7255	19939.5	684	4010.83	7410	30579.4	529	20494.6	5795	47633.1	2144	612.611
7655.1	19357.5	283.9	14500.8	7255.1	18681	683.9	2787.37	7410.1	25878.4	528.9	15803.6	5795.1	47128	2143.9	100.829
7655.2	15729.9	283.8	10924.7	7255.2	18689.9	683.8	2831.24	7410.2	21161	528.8	11096.5	5795.2	48200.2	2143.8	1166.02
7655.3	12128.5	283.7	7373.41	7255.3	17480.5	683.7	1656.65	7410.3	17829.4	528.7	7775.49	5795.3	46907.1	2143.7	-134.188
7655.4	10367.8	283.6	5661.21	7255.4	16462.4	683.6	673.082	7410.4	15198	528.6	5155.11	5795.4	46733.1	2143.6	-315.587
7655.5	8644.12	283.5	3984.36	7255.5	16154.3	683.5	399.272	7410.5	13427.1	528.5	3395.67	5795.5	47464.2	2143.5	408.06
7655.6	6981.34	283.4	2366.76	7255.6	16054.9	683.4	333.853	7410.6	12232.3	528.4	2212.76	5795.6	47248	2143.4	184.052
7655.7	6531.62	283.3	1960.51	7255.7	16293.2	683.3	605.957	7410.7	11101.2	528.3	1093.85	5795.7	47624.1	2143.3	552.324
7655.8	5986.09	283.2	1456.68	7255.8	15690.9	683.2	37.094	7410.8	10468.7	528.2	474.037	5795.8	48137.5	2143.2	1057.61
7655.9	5215.69	283.1	726.151	7255.9	14418.5	683.1	-1202.12	7410.9	10465.6	528.1	484.126	5795.9	47202.2	2143.1	114.086
7656	5139.78	283	688.245	7256	15677	683	89.1775	7411	9667.87	528	-299.993	5796	46779.9	2143	-316.677
7656.1	4950.47	282.9	535.008	7256.1	15940.6	682.9	385.277	7411.1	9998.31	527.9	44.5496	5796.1	47205	2142.9	99.8906
7656.2	4751.83	282.8	370.478	7256.2	15339	682.8	-184.251	7411.2	10341	527.8	401.88	5796.2	47986.4	2142.8	872.596
7656.3	4919.69	282.7	570.415	7256.3	16066	682.7	574.468	7411.3	9924.02	527.7	0	5796.3	47455	2142.7	332.274
7656.4	5034.1	282.6	714.839	7256.4	15460.3	682.6	0	7411.4	10623.4	527.6	715.042	5796.4	47627.8	2142.6	496.14
7656.5	4892.47	282.5	601.089	7256.5	15391.6	682.5	-37.7793	7411.5	10223	527.5	330.816	5796.5	45779.5	2142.5	-1361.38
7656.6	4973.45	282.4	707.771	7256.6	15530.4	682.4	131.338	7411.6	10203.9	527.4	328.558	5796.6	45298.6	2142.4	-1851.47
7656.7	4607.79	282.3	365.588	7256.7	15613.6	682.3	244.486	7411.7	9947.97	527.3	89.9461	5796.7	46826.9	2142.3	-332.556
7656.8	4853.63	282.2	632.634	7256.8	15698.5	682.2	358.827	7411.8	10570.2	527.2	730.143	5796.8	46883.4	2142.2	-285.598
7656.9	4680.65	282.1	478.535	7256.9	16502.5	682.1	1191.86	7411.9	9752.51	527.1	-69.0091	5796.9	45126.2	2142.1	-2052.38
7657	4585.94	282	400.318	7257	15283.4	682	1.24717	7412	9375.86	527	-426.476	5797	48539.8	2142	1351.49
7657.1	4061.44	281.9	-110.106	7257.1	15097.5	681.9	-156.755	7412.1	9662.48	526.9	-120.038	5797.1	49219.7	2141.9	2021.6
7657.2	3699.09	281.8	-460.788	7257.2	15487.2	681.8	260.362	7412.2	9043.46	526.8	-718.579	5797.2	49343.4	2141.8	2135.38
7657.3	4610.41	281.7	459.978	7257.3	15039.5	681.7	-160.455	7412.3	9937.45	526.7	196.55	5797.3	49026.9	2141.7	1808.95
7657.4	4163.86	281.6	20.8526	7257.4	14790.6	681.6	-382.994	7412.4	10310.5	526.6	591.479	5797.4	48261.8	2141.6	1033.76
7657.5	4345.04	281.5	207.629	7257.5	15056.4	681.5	-91.4558	7412.5	9787	526.5	90.4615	5797.5	46324.6	2141.5	-913.533
7657.6	5076.12	281.4	942.685	7257.6	15182.4	681.4	59.7101	7412.6	10603.8	526.4	930.489	5797.6	49050.7	2141.4	1802.32
7657.7	4904.34	281.3	773.438	7257.7	15640.8	681.3	542.735	7412.7	9294.82	526.3	-354.507	5797.7	46356.4	2141.3	-902.269
7657.8	4547.4	281.2	417.811	7257.8	16009.8	681.2	935.7	7412.8	9351.08	526.2	-273.532	5797.8	47400.6	2141.2	131.662
7657.9	3647.29	281.1	-482.034	7257.9	16325.6	681.1	1274.89	7412.9	10439.4	526.1	840.219	5797.9	48632.4	2141.1	1353.04
7658	4362.17	281	232.285	7258	15791.6	681	763.62	7413	9574.91	526	2.02449	5798	47816.5	2141	526.704
7658.1	4768.61	280.9	637.512	7258.1	15725.8	680.9	719.889	7413.1	9563.79	525.9	17.9422	5798.1	49380.7	2140.9	2080.49
7658.2	4836.1	280.8	703.354	7258.2	15774.7	680.8	790.213	7413.2	10110.3	525.8	592.336	5798.2	47454.8	2140.8	144.144
7658.3	4196.04	280.7	61.4091	7258.3	15247.9	680.7	284.205	7413.3	9444.12	525.7	-45.2101	5798.3	46784.1	2140.7	-537.084
7658.4	3655.35	280.6	-481.226	7258.4	14206.2	680.6	-737.481	7413.4	9459.83	525.6	0	5798.4	49249.7	2140.6	1918
7658.5	4138.36	280.5	0	7258.5	15833.1	680.5	908.757	7413.5	9461.63	525.5	32.1183	5798.5	49016.3	2140.5	1674
7658.6	4591.32	280.4	451.486	7258.6	16159	680.4	1253.32	7413.6	10091.6	525.4	693.042	5798.6	45784.1	2140.4	-1568.71
7658.7	4389.91	280.3	248.906	7258.7	16790.7	680.3	1902.91	7413.7	9817.02	525.3	449.811	5798.7	47973.6	2140.3	610.272
7658.8	4333.24	280.2	191.337	7258.8	15749.1	680.2	878.48	7413.8	10430.8	525.2	1095.17	5798.8	47821.3	2140.2	447.389
7658.9	4229.92	280.1	87.3383	7258.9	15302.7	680.1	448.539	7413.9	9795.84	525.1	491.729	5798.9	48649.3	2140.1	1264.81
7659	4166.83	280	23.7613	7259	14463.8	680	-374.734	7414	9033.68	525	-239.129	5799	47427	2140	32.0163
7659.1	4073.35	279.9	-70.0718	7259.1	14999.6	679.9	175.998	7414.1	9317.12	524.9	75.157
7659.2	4211.34	279.8	67.6754	7259.2	16690.3	679.8	1880.75	7414.2	9072.48	524.8	-139.303
7659.3	3829.49	279.7	-314.36	7259.3	16291.9	679.7	1495.63	7414.3	9064.52	524.7	-117.983
7659.4	4225.93	279.6	81.9133	7259.4	15599.8	679.6	816	7414.4	9485.9	524.6	331.577
7659.5	4215.49	279.5	71.2889	7259.5	15257	679.5	484.799	7414.5	10050.9	524.5	923.427
7659.6	4063.44	279.4	-81.0162	7259.6	15000.5	679.4	239.148	7414.6	9446.6	524.4	344.445
7659.7	4383.33	279.3	238.526	7259.7	14691.9	679.3	-59.6043	7414.7	9634.78	524.3	556.182
7659.8	4538.05	279.2	392.749	7259.8	15423.3	679.2	680.937	7414.8	9487.28	524.2	430.253
7659.9	4130.23	279.1	-15.7639	7259.9	14678.6	679.1	-55.6673	7414.9	9037.64	524.1	0
7660	4116.92	279	-29.9831	7260	14381.5	679	-345.499	7415	9860.16	524	839.531
7660.1	4874.22	278.9	726.137	7260.1	15293.5	678.9	572.943	7415.1	10068.6	523.9	1062.59
7660.2	5103.28	278.8	953.708	7260.2	14451.3	678.8	-263.616	7415.2	10063.4	523.8	1069.78
7660.3	4684.93	278.7	533.52	7260.3	15621.4	678.7	911.267	7415.3	9004.52	523.7	21.0595
7660.4	4726.44	278.6	572.792	7260.4	15085.5	678.6	379.401	7415.4	8849.92	523.6	-125.591
7660.5	4136.92	278.5	-19.3904	7260.5	15548.5	678.5	845.852	7415.5	9674.46	523.5	704.791
7660.6	3901.09	278.4	-258.367	7260.6	14778.6	678.4	78.6639	7415.6	9689.22	523.4	723.333
7660.7	3938.58	278.3	-224.534	7260.7	15156.9	678.3	458.958	7415.7	9487.94	523.3	523.831
7660.8	4136.53	278.2	-30.7962	7260.8	14928.2	678.2	231.784	7415.8	9007.95	523.2	43.6761
7660.9	4805.54	278.1	633.396	7260.9	14805.3	678.1	109.822	7415.9	8953.01	523.1	-13.31
7661	4200.29	278	22.7002	7261	15817.1	678	1122.08	7416	9968.99	523	998.803
7661.1	4167.42	277.9	-16.2659	7261.1	15454.7	677.9	759.62	7416.1	8835.93	522.9	-139.894
7661.2	4377.49	277.8	187.079	7261.2	15121.5	677.8	425.926	7416.2	9272.82	522.8	289.661
7661.3	4585.54	277.7	387.802	7261.3	15847.9	677.7	1151.46	7416.3	10133.5	522.7	1141.39
7661.4	4527.77	277.6	322.122	7261.4	15305.2	677.6	607.518	7416.4	9667.53	522.6	664.809
7661.5	4234.69	277.5	20.5691	7261.5	15560.9	677.5	861.685	7416.5	9365.29	522.5	350.467
7661.6	3912.85	277.4	-310.281	7261.6	16732.6	677.4	2031.52	7416.6	9359.2	522.4	330.801
7661.7	4043.69	277.3	-188.973	7261.7	16440.6	677.3	1737.44	7416.7	8878.31	522.3	-165.073
7661.8	4832.58	277.2	589.893	7261.8	15090.7	677.2	385.225	7416.8	9212.93	522.2	153.203
7661.9	4916.3	277.1	663.104	7261.9	15058.5	677.1	350.592	7416.9	9842.13	522.1	764.773
7662	4195	277	-69.1481	7262	14122.7	677	-587.766	7417	9410.51	522	314.275
7662.1	4360.02	276.9	84.4864	7262.1	14306.6	676.9	-406.5	7417.1	9858.55	521.9	742.271
7662.2	4499.97	276.8	212.64	7262.2	15001.8	676.8	286.002	7417.2	9918.61	521.8	781.17
7662.3	4035.43	276.7	-264.089	7262.3	15314.1	676.7	595.524	7417.3	9552.93	521.7	393.269
7662.4	4283.3	276.6	-28.7782	7262.4	15213.2	676.6	491.985	7417.4	9438.04	521.6	255.149
7662.5	4311.7	276.5	-13.2736	7262.5	14845.9	676.5	122.043	7417.5	9510.8	521.5	303.752
7662.6	4878.09	276.4	539.898	7262.6	15886.2	676.4	1159.82	7417.6	9706.78	521.4	474.687
7662.7	4686.48	276.3	334.757	7262.7	15476.4	676.3	747.558	7417.7	9195.21	521.3	-62.7605
7662.8	4424.02	276.2	58.4953	7262.8	15995.7	676.2	1264.71	7417.8	9644.74	521.2	360.135
7662.9	4676.06	276.1	296.467	7262.9	15169.3	676.1	436.344	7417.9	9870.04	521.1	558.1
7663	4363.42	276	-30.4764	7263	15081.3	676	346.57	7418	9514.47	521	174.537
7663.1	4144.8	275.9	-263.613	7263.1	15636	675.9	899.866	7418.1	9360.96	520.9	-7.54967
7663.2	4427.46	275.8	4.32862	7263.2	15503.7	675.8	766.405	7418.2	9770.36	520.8	372.748
7663.3	4463.28	275.7	25.2635	7263.3	15137.8	675.7	399.786	7418.3	10094.3	520.7	667.087
7663.4	4153.16	275.6	-299.887	7263.4	15890.7	675.6	1152.33	7418.4	9929.9	520.6	472.729
7663.5	4194.84	275.5	-273.376	7263.5	15496.9	675.5	758.664	7418.5	9320.81	520.5	-166.704
7663.6	4587.27	275.4	103.78	7263.6	15895.9	675.4	1158.32	7418.6	10012.4	520.4	494.289
7663.7	4139.84	275.3	-359.016	7263.7	14138.9	675.3	-597.487	7418.7	9364.1	520.3	-184.925
7663.8	4332.04	275.2	-182.234	7263.8	14998.6	675.2	263.89	7418.8	9330.55	520.2	-249.514
7663.9	4916.33	275.1	386.583	7263.9	16210.4	675.1	1477.99	7418.9	10303.3	520.1	692.032
7664	4545.24	275	0	7264	16008.2	675	1278.7	7419	9642.46	520	0
				7264.1	14038.8	674.9	-687.25
				7264.2	13783.9	674.8	-938.09
				7264.3	13786.3	674.7	-931.116
				7264.4	14781.4	674.6	69.1365
				7264.5	15326.2	674.5	619.631
				7264.6	15328.6	674.4	628.143
				7264.7	14999.3	674.3	305.61
				7264.8	14805.6	674.2	119.012
				7264.9	15446.2	674.1	767.324
				7265	15748.3	674	1077.59
				7265.1	15197.5	673.9	535.359
				7265.2	14401.6	673.8	-251.567
				7265.3	14873.8	673.7	230.166
				7265.4	16364	673.6	1730.27
				7265.5	15471.6	673.5	848.098
				7265.6	15465.8	673.4	853.041
				7265.7	15662.5	673.3	1060.8
				7265.8	14141	673.2	-449.303
				7265.9	14420.1	673.1	-158.428
				7266	15150.4	673	584.087
				7266.1	14684.2	672.9	130.351
				7266.2	14769.6	672.8	228.528
				7266.3	15332.5	672.7	804.507
				7266.4	14088.5	672.6	-426.09
				7266.5	14604	672.5	103.117
				7266.6	14655.5	672.4	168.51
				7266.7	15271.5	672.3	798.752
				7266.8	15937.6	672.2	1479.31
				7266.9	15951.4	672.1	1507.8
				7267	15582.6	672	1153.9
				7267.1	14650.6	671.9	237.045
				7267.2	14327.4	671.8	-70.8477
				7267.3	15812.5	671.7	1429.73
				7267.4	14516.6	671.6	149.551
				7267.5	14706.7	671.5	355.435
				7267.6	15007.5	671.4	672.233
				7267.7	15887.1	671.3	1568.01
				7267.8	15057.6	671.2	754.758
				7267.9	13650.3	671.1	-636.272
				7268	14339.7	671	69.6169
				7268.1	15064.4	670.9	810.889
				7268.2	15024.9	670.8	788.007
				7268.3	14721.5	670.7	501.307
				7268.4	14502.2	670.6	298.733
				7268.5	15683.7	670.5	1496.98
				7268.6	15053.8	670.4	883.822
				7268.7	14153.2	670.3	0
				7268.8	14174.4	670.2	38.0647
				7268.9	14417.1	670.1	297.471
				7269	15659	670	1556.21

## Sheet: Na2O2
This file contains the raw data (intensity as a function of kinetic energy) and the processed data (intensity as a function of binding energy, normalised when necessary), with each tab corresponding to a different material, arranged in the same order and labeled using the abbreviations listed in Table S1.
Supplementary Information for: X‑Ray Photoelectron Spectroscopy Analysis of Reference Compounds for Studying Rechargeable Li‑, Na‑, and K‑ion Batteries
C1s				O1s
Raw data		Processed data		Raw data		Processed data
Kinetic energy / eV	Intensity / a.u.	Binding energy / eV	Intensity / a.u.	Kinetic energy / eV	Intensity / a.u.	Binding energy / eV	Intensity / a.u.
7639	7318.17	299.95	0	7394	15340.1	544.95	0
7639.1	7116.22	299.85	-0.08123	7394.1	14990.5	544.85	-0.10805
7639.2	7653.89	299.75	0.2391	7394.2	14672.6	544.75	-0.20408
7639.3	7638.08	299.65	0.25875	7394.3	14452.4	544.65	-0.26313
7639.4	8216.11	299.55	0.60068	7394.4	14433.6	544.55	-0.24589
7639.5	7719.02	299.45	0.35856	7394.5	14852.9	544.45	-0.06289
7639.6	7292.86	299.35	0.15465	7394.6	14913.6	544.35	-0.01525
7639.7	7079.4	299.25	0.06586	7394.7	14042.5	544.25	-0.31956
7639.8	7568.76	299.15	0.35826	7394.8	14201.7	544.15	-0.23415
7639.9	7830.77	299.05	0.52671	7394.9	14206.1	544.05	-0.20694
7640	7474.85	298.95	0.35907	7395	13848.1	543.95	-0.31632
7640.1	7351.55	298.85	0.31711	7395.1	14010.1	543.85	-0.22872
7640.2	6740.04	298.75	0.00936	7395.2	14055	543.75	-0.18496
7640.3	6634.6	298.65	-0.02433	7395.3	14093.1	543.65	-0.14326
7640.4	7707.59	298.55	0.58104	7395.4	14793.6	543.55	0.14932
7640.5	7113.54	298.45	0.28034	7395.5	14657.4	543.45	0.12624
7640.6	7051.46	298.35	0.26756	7395.6	14996.6	543.35	0.28348
7640.7	7439.5	298.25	0.4982	7395.7	14314.3	543.25	0.05524
7640.8	6706.89	298.15	0.11926	7395.8	14031.2	543.15	-0.0214
7640.9	6848.47	298.05	0.21387	7395.9	14849	543.05	0.31887
7641	7111.33	297.95	0.37316	7396	15571.9	542.95	0.62407
7641.1	6420.35	297.85	0.01326	7396.1	14635.4	542.85	0.30301
7641.2	6477.66	297.75	0.05837	7396.2	14060.9	542.75	0.1198
7641.3	6346.93	297.65	0	7396.3	13573	542.65	-0.02951
7641.4	6709.51	297.55	0.20807	7396.4	13969.4	542.55	0.15669
7641.5	6895.15	297.45	0.31859	7396.5	14960.7	542.45	0.56905
7641.6	7428.02	297.35	0.61617	7396.6	14333.8	542.35	0.37122
7641.7	7727.87	297.25	0.78572	7396.7	13553.7	542.25	0.11697
7641.8	6282.58	297.15	0.00612	7396.8	13003.6	542.15	-0.04865
7641.9	6806.78	297.05	0.29439	7396.9	14498.5	542.05	0.56039
7642	7150.61	296.95	0.48314	7397	13547.9	541.95	0.24692
7642.1	6831.86	296.85	0.31049	7397.1	12673.4	541.85	-0.03591
7642.2	6536.99	296.75	0.14918	7397.2	12163.5	541.75	-0.17887
7642.3	6301.53	296.65	0.01847	7397.3	13064.6	541.65	0.21362
7642.4	6208.53	296.55	-0.03656	7397.4	12988.5	541.55	0.23896
7642.5	6690.25	296.45	0.21878	7397.5	12655	541.45	0.16929
7642.6	6901.31	296.35	0.32541	7397.6	11841.4	541.35	-0.07949
7642.7	6443.63	296.25	0.06716	7397.7	11394.9	541.25	-0.18735
7642.8	5961.26	296.15	-0.20626	7397.8	11733.1	541.15	0.00325
7642.9	5621.2	296.05	-0.40423	7397.9	12116	541.05	0.21215
7643	5879.22	295.95	-0.27925	7398	11839.2	540.95	0.17285
7643.1	6978.97	295.85	0.30092	7398.1	10894	540.85	-0.11831
7643.2	6586.36	295.75	0.06899	7398.2	11595.2	540.75	0.21333
7643.3	6320.06	295.65	-0.09595	7398.3	11291.3	540.65	0.16513
7643.4	6707.94	295.55	0.09295	7398.4	11001	540.55	0.12189
7643.5	6828.71	295.45	0.13561	7398.5	10998.3	540.45	0.18676
7643.6	7675.83	295.35	0.57168	7398.6	10286.4	540.35	-0.01731
7643.7	6980.25	295.25	0.16924	7398.7	10311.8	540.25	0.05607
7643.8	6827.32	295.15	0.06085	7398.8	10568.5	540.15	0.21533
7643.9	6577.4	295.05	-0.10064	7398.9	9870.28	540.05	0.0117
7644	7049.9	294.95	0.12991	7399	9285.54	539.95	-0.15127
7644.1	6765.41	294.85	-0.05064	7399.1	10200.5	539.85	0.25005
7644.2	6936.05	294.75	0.01611	7399.2	9542.48	539.75	0.05388
7644.3	6674.82	294.65	-0.15132	7399.3	10179	539.65	0.34375
7644.4	7065.76	294.55	0.03592	7399.4	9961.08	539.55	0.30708
7644.5	7119.66	294.45	0.04087	7399.5	10395.2	539.45	0.51295
7644.6	7075.31	294.35	-0.00661	7399.6	10460	539.35	0.57491
7644.7	7158.13	294.25	0.01606	7399.7	8852.14	539.25	0
7644.8	7369.45	294.15	0.10982	7399.8	8962.74	539.15	0.06984
7644.9	7288.12	294.05	0.04612	7399.9	9029.92	539.05	0.11867
7645	7604.19	293.95	0.19969	7400	8508.93	538.95	-0.05905
7645.1	7807.83	293.85	0.29366	7400.1	9042.38	538.85	0.15793
7645.2	7435.1	293.75	0.0761	7400.2	8954.84	538.75	0.13666
7645.3	8360.33	293.65	0.56474	7400.3	9370.4	538.65	0.30241
7645.4	7916.31	293.55	0.31126	7400.4	10246.2	538.55	0.63935
7645.5	7741.45	293.45	0.2053	7400.5	9212.86	538.45	0.25218
7645.6	8414.71	293.35	0.56122	7400.6	9176.92	538.35	0.23996
7645.7	8806.49	293.25	0.76563	7400.7	9153.93	538.25	0.23092
7645.8	7749.03	293.15	0.1844	7400.8	9163.63	538.15	0.23289
7645.9	7968.26	293.05	0.2977	7400.9	9064.39	538.05	0.19267
7646	9280.64	292.95	1.00584	7401	8563.51	537.95	0
7646.1	9061.36	292.85	0.88353	7401.1	9306.76	537.85	0.27728
7646.2	9226.14	292.75	0.97098	7401.2	9315.87	537.75	0.27678
7646.3	9794.59	292.65	1.27882	7401.3	9335.23	537.65	0.2799
7646.4	10198.4	292.55	1.49844	7401.4	8361.08	537.55	-0.09277
7646.5	11295.9	292.45	2.09587	7401.5	9890.15	537.45	0.48054
7646.6	12424.7	292.35	2.71148	7401.6	9197.29	537.35	0.21374
7646.7	13060	292.25	3.06021	7401.7	9504.66	537.25	0.32481
7646.8	14176.4	292.15	3.67127	7401.8	9901.62	537.15	0.46955
7646.9	14636.1	292.05	3.92677	7401.9	9301.55	537.05	0.23722
7647	16054.4	291.95	4.70388	7402	10766.3	536.95	0.78522
7647.1	17823.1	291.85	5.67227	7402.1	12015.5	536.85	1.25156
7647.2	18942.8	291.75	6.28925	7402.2	12579.7	536.75	1.45881
7647.3	20437.3	291.65	7.1108	7402.3	11174.9	536.65	0.92166
7647.4	21302.5	291.55	7.59151	7402.4	11250.9	536.55	0.94409
7647.5	23414.1	291.45	8.75003	7402.5	13866.6	536.45	1.92643
7647.6	24306.4	291.35	9.24736	7402.6	14205.9	536.35	2.04815
7647.7	26907.9	291.25	10.6737	7402.7	14420	536.25	2.12245
7647.8	25448.8	291.15	9.89596	7402.8	16842.5	536.15	3.03145
7647.9	25272.9	291.05	9.8159	7402.9	16256.3	536.05	2.80306
7648	25862.1	290.95	10.1521	7403	16903.9	535.95	3.04097
7648.1	23661.9	290.85	8.97451	7403.1	20099.7	535.85	4.24204
7648.2	22637.6	290.75	8.43619	7403.2	21032.9	535.75	4.58784
7648.3	23272.6	290.65	8.79966	7403.3	21930.8	535.65	4.92022
7648.4	23096.9	290.55	8.7237	7403.4	22092.4	535.55	4.97427
7648.5	22543.2	290.45	8.44319	7403.5	24134.3	535.45	5.73905
7648.6	21472.1	290.35	7.88242	7403.6	24543	535.35	5.88649
7648.7	19657.3	290.25	6.91854	7403.7	26255.3	535.25	6.52665
7648.8	19588.9	290.15	6.90361	7403.8	26737.7	535.15	6.70199
7648.9	17989.5	290.05	6.05798	7403.9	28414.6	535.05	7.32886
7649	17993.8	289.95	6.08379	7404	28744.1	534.95	7.44644
7649.1	17267.2	289.85	5.7133	7404.1	31284.4	534.85	8.39976
7649.2	17483.1	289.75	5.85521	7404.2	32605.7	534.75	8.89236
7649.3	17229.3	289.65	5.74262	7404.3	33932.9	534.65	9.38726
7649.4	16876.9	289.55	5.57699	7404.4	35052.1	534.55	9.80362
7649.5	15813	289.45	5.02558	7404.5	37242.3	534.45	10.6249
7649.6	16174.2	289.35	5.2485	7404.6	39355.2	534.35	11.4171
7649.7	15495.8	289.25	4.90736	7404.7	41330.9	534.25	12.1575
7649.8	14812.9	289.15	4.56424	7404.8	42302.4	534.15	12.5185
7649.9	15973.4	289.05	5.22252	7404.9	45780.8	534.05	13.8272
7650	14451.9	288.95	4.42488	7405	47952.8	533.95	14.6423
7650.1	15386.5	288.85	4.96131	7405.1	51945.2	533.85	16.1456
7650.2	16730.7	288.75	5.72049	7405.2	54962.2	533.75	17.2804
7650.3	14958.5	288.65	4.78779	7405.3	59109.9	533.65	18.8428
7650.4	15963.6	288.55	5.36353	7405.4	63189.9	533.55	20.3797
7650.5	16947.8	288.45	5.92821	7405.5	64504.3	533.45	20.8715
7650.6	16240	288.35	5.57443	7405.6	71237.3	533.35	23.4118
7650.7	16962.8	288.25	5.99776	7405.7	75862.6	533.25	25.1555
7650.8	17349	288.15	6.2385	7405.8	79208.1	533.15	26.4157
7650.9	17345.5	288.05	6.26786	7405.9	84634.3	533.05	28.4627
7651	18766.5	287.95	7.07095	7406	91299.2	532.95	30.9782
7651.1	18498.6	287.85	6.9571	7406.1	94332.6	532.85	32.1212
7651.2	18772.2	287.75	7.13751	7406.2	95881.6	532.75	32.7034
7651.3	20012.3	287.65	7.84281	7406.3	101136	532.65	34.6866
7651.4	21793.4	287.55	8.84199	7406.4	105470	532.55	36.3221
7651.5	22625.5	287.45	9.32596	7406.5	104086	532.45	35.7966
7651.6	23635.4	287.35	9.90653	7406.6	106249	532.35	36.6122
7651.7	24439.8	287.25	10.3756	7406.7	106654	532.25	36.7635
7651.8	27229.5	287.15	11.9227	7406.8	106271	532.15	36.6173
7651.9	26391.7	287.05	11.5	7406.9	100419	532.05	34.404
7652	28026.4	286.95	12.4199	7407	96252.1	531.95	32.8283
7652.1	29577.3	286.85	13.2943	7407.1	94007.6	531.85	31.9796
7652.2	29393.2	286.75	13.2265	7407.2	86734.8	531.75	29.2306
7652.3	31132.3	286.65	14.2029	7407.3	79158	531.65	26.367
7652.4	30574.7	286.55	13.9322	7407.4	71479.4	531.55	23.4655
7652.5	30895.9	286.45	14.1385	7407.5	64019.7	531.45	20.647
7652.6	31787.1	286.35	14.6541	7407.6	56769.5	531.35	17.9082
7652.7	32021.8	286.25	14.8131	7407.7	49489.8	531.25	15.1587
7652.8	32432.8	286.15	15.0677	7407.8	42269.7	531.15	12.4322
7652.9	31318.3	286.05	14.4937	7407.9	36190.6	531.05	10.1374
7653	30460.3	285.95	14.0587	7408	31502.8	530.95	8.36899
7653.1	30692.4	285.85	14.2155	7408.1	29336.1	530.85	7.55407
7653.2	31247.5	285.75	14.5473	7408.2	24249.3	530.75	5.63588
7653.3	31482.1	285.65	14.7049	7408.3	20678.6	530.65	4.29126
7653.4	30180.2	285.55	14.0277	7408.4	18480	530.55	3.4658
7653.5	31288	285.45	14.6588	7408.5	17305.8	530.45	3.02812
7653.6	31773.7	285.35	14.9517	7408.6	16034.6	530.35	2.55432
7653.7	35484.5	285.25	16.9953	7408.7	13033.9	530.25	1.42729
7653.8	40465.5	285.15	19.7284	7408.8	11758.4	530.15	0.95298
7653.9	46940.6	285.05	23.2723	7408.9	11051.7	530.05	0.69427
7654	55885.3	284.95	28.1568	7409	10801.1	529.95	0.60854
7654.1	65463.2	284.85	33.3846	7409.1	10412	529.85	0.47102
7654.2	70929.7	284.75	36.3795	7409.2	10739.1	529.75	0.60487
7654.3	75914.8	284.65	39.1125	7409.3	9923.53	529.65	0.30741
7654.4	75351.3	284.55	38.832	7409.4	8909.7	529.55	-0.06437
7654.5	69474.2	284.45	35.6657	7409.5	8870.96	529.45	-0.06692
7654.6	57229.7	284.35	29.0413	7409.6	9403.99	529.35	0.14731
7654.7	43508.3	284.25	21.6144	7409.7	9299.82	529.25	0.12134
7654.8	31547.8	284.15	15.1431	7409.8	8418.13	529.15	-0.19785
7654.9	21516.3	284.05	9.71852	7409.9	8851.29	529.05	-0.01935
7655	15800.6	283.95	6.63682	7410	8857.48	528.95	-0.00158
7655.1	12303.8	283.85	4.75929	7410.1	9249.16	528.85	0.16247
7655.2	9905.16	283.75	3.47738	7410.2	9457.1	528.75	0.25757
7655.3	7775.28	283.65	2.34068	7410.3	8446.6	528.65	-0.1075
7655.4	6136.32	283.55	1.46981	7410.4	8294.64	528.55	-0.14771
7655.5	5726.76	283.45	1.26575	7410.5	9692.87	528.45	0.3983
7655.6	4314.15	283.35	0.51625	7410.6	9181.31	528.35	0.22258
7655.7	3847.73	283.25	0.27972	7410.7	8724.87	528.25	0.06777
7655.8	3895.57	283.15	0.32162	7410.8	8522.44	528.15	0.00897
7655.9	3860.27	283.05	0.31752	7410.9	8052.38	528.05	-0.15107
7656	3929.2	282.95	0.36916	7411	7927.81	527.95	-0.18068
7656.1	3956.24	282.85	0.39715	7411.1	7782.48	527.85	-0.21838
7656.2	4047.94	282.75	0.45936	7411.2	7939.79	527.75	-0.14202
7656.3	3613.4	282.65	0.23487	7411.3	8552.51	527.65	0.10608
7656.4	2912.82	282.55	-0.13502	7411.4	8798.09	527.55	0.2149
7656.5	3071.25	282.45	-0.03944	7411.5	7883.91	527.45	-0.11525
7656.6	3595.51	282.35	0.25379	7411.6	7646.25	527.35	-0.19032
7656.7	3078.32	282.25	-0.0195	7411.7	8246.68	527.25	0.05074
7656.8	3533.95	282.15	0.23441	7411.8	7780.68	527.15	-0.11195
7656.9	3092.22	282.05	0	7411.9	7506.37	527.05	-0.20281
7657	2768.73	281.95	-0.17126	7412	7979.7	526.95	-0.01165
7657.1	3610.94	281.85	0.28952	7412.1	8442.51	526.85	0.17496
7657.2	3218.53	281.75	0.07911	7412.2	8495.56	526.75	0.20612
7657.3	3015.66	281.65	-0.02902	7412.3	7809.84	526.65	-0.04249
7657.4	3257.27	281.55	0.1037	7412.4	7580.28	526.55	-0.11918
7657.5	3473.9	281.45	0.2225	7412.5	7736.98	526.45	-0.05035
7657.6	3496.66	281.35	0.23583	7412.6	7818.02	526.35	-0.01058
7657.7	2973.22	281.25	-0.0475	7412.7	7410.64	526.25	-0.15587
7657.8	3150.93	281.15	0.04998	7412.8	7546.41	526.15	-0.09625
7657.9	3181.84	281.05	0.06798	7412.9	7195.32	526.05	-0.22107
7658	2728.58	280.95	-0.17656	7413	7407.72	525.95	-0.13325
7658.1	2913.58	280.85	-0.074	7413.1	7439.27	525.85	-0.11413
7658.2	3480.22	280.75	0.23639	7413.2	8033.68	525.75	0.11742
7658.3	3262.57	280.65	0.12143	7413.3	7859.57	525.65	0.05817
7658.4	3429.28	280.55	0.21563	7413.4	8290.77	525.55	0.22746
7658.5	3757.87	280.45	0.39809	7413.5	8843.54	525.45	0.44245
7658.6	3275.79	280.35	0.14063	7413.6	8957.38	525.35	0.49129
7658.7	2815.96	280.25	-0.10457	7413.7	8790.31	525.25	0.43374
7658.8	2885.58	280.15	-0.06218	7413.8	8678.52	525.15	0.39691
7658.9	2887.22	280.05	-0.05668	7413.9	8517.42	525.05	0.34127
7659	2964.05	279.95	-0.01043	7414	8739.27	524.95	0.43025
7659.1	3067.51	279.85	0.05012	7414.1	7866.48	524.85	0.10535
7659.2	2993.26	279.75	0.01393	7414.2	8392.59	524.75	0.30913
7659.3	2960.61	279.65	0	7414.3	7686.07	524.65	0.04691
7659.4	3319.83	279.55	0.19845	7414.4	7230.3	524.55	-0.12057
7659.5	3159.75	279.45	0.11451	7414.5	7536.62	524.45	0
7659.6	3094.09	279.35	0.08145	7414.6	7670.58	524.35	0.05541
7659.7	3042.07	279.25	0.05539	7414.7	8118.18	524.25	0.22941
7659.8	3042.29	279.15	0.05733	7414.8	8379.45	524.15	0.33301
7659.9	3173.09	279.05	0.12979	7414.9	8546.53	524.05	0.40109
7660	3486.64	278.95	0.30112	7415	8281.58	523.95	0.30594
7660.1	3172.14	278.85	0.13107
7660.2	3539.6	278.75	0.33097
7660.3	3948.37	278.65	0.55297
7660.4	3303.08	278.55	0.20228
7660.5	3156.6	278.45	0.12213
7660.6	2803.38	278.35	-0.07059
7660.7	2836.8	278.25	-0.05367
7660.8	2842.6	278.15	-0.05204
7660.9	3297.03	278.05	0.19291
7661	3424.43	277.95	0.26001
7661.1	2964.94	277.85	0.00816
7661.2	3246.61	277.75	0.1585
7661.3	3620.23	277.65	0.35852
7661.4	3947.75	277.55	0.53327
7661.5	3241.67	277.45	0.14655
7661.6	2338.27	277.35	-0.34754
7661.7	2569.15	277.25	-0.22593
7661.8	3036.24	277.15	0.02374
7661.9	3481.46	277.05	0.26133
7662	3684.87	276.95	0.36743
7662.1	3201.12	276.85	0.10024
7662.2	2889.76	276.75	-0.07352
7662.3	2902.23	276.65	-0.0716
7662.4	3483.79	276.55	0.23918
7662.5	3299.77	276.45	0.13411
7662.6	2873.99	276.35	-0.10236
7662.7	3319.43	276.25	0.13411
7662.8	2698	276.15	-0.20885
7662.9	3113.01	276.05	0.01087
7663	3351.26	275.95	0.13452
7663.1	3192.75	275.85	0.04264
7663.2	3373.53	275.75	0.13491
7663.3	3352.44	275.65	0.1175
7663.4	2997.73	275.55	-0.08114
7663.5	3184.28	275.45	0.01409
7663.6	3595.48	275.35	0.23124
7663.7	3706.77	275.25	0.28552
7663.8	3187.03	275.15	-0.00289
7663.9	2998.05	275.05	-0.11171
7664	3215.21	274.95	0

## Sheet: KO2
This file contains the raw data (intensity as a function of kinetic energy) and the processed data (intensity as a function of binding energy, normalised when necessary), with each tab corresponding to a different material, arranged in the same order and labeled using the abbreviations listed in Table S1.
Supplementary Information for: X‑Ray Photoelectron Spectroscopy Analysis of Reference Compounds for Studying Rechargeable Li‑, Na‑, and K‑ion Batteries
C1s				O1s
Raw data		Processed data		Raw data		Processed data
Kinetic energy / eV	Intensity / a.u.	Binding energy / eV	Intensity / a.u.	Kinetic energy / eV	Intensity / a.u.	Binding energy / eV	Intensity / a.u.
7639	11175.6	299.9	7062.59	7394	25938.1	544.9	-0.45119
7639.1	12139.1	299.8	8041.58	7394.1	27757.2	544.8	0.32272
7639.2	13118.1	299.7	9036.2	7394.2	27529	544.7	0.28415
7639.3	12600	299.6	8533.86	7394.3	27180.6	544.6	0.19807
7639.4	12538.8	299.5	8488.38	7394.4	25903.3	544.5	-0.25661
7639.5	12788.6	299.4	8753.96	7394.5	26592.7	544.4	0.06957
7639.6	13916.6	299.3	9897.72	7394.6	26243.6	544.3	-0.01653
7639.7	13703.4	299.2	9700.09	7394.7	26929.7	544.2	0.30836
7639.8	14568	299.1	10580	7394.8	26073.6	544.1	0.0209
7639.9	15457.5	299	11484.8	7394.9	26770.8	544	0.34998
7640	16141.5	298.9	12183.8	7395	26329.4	543.9	0.22682
7640.1	14787.9	298.8	10844.9	7395.1	28605.2	543.8	1.18217
7640.2	16215.8	298.7	12287	7395.2	26750.7	543.7	0.49746
7640.3	17511.4	298.6	13596.6	7395.3	26757.4	543.6	0.55127
7640.4	16994.4	298.5	13092.9	7395.4	26528	543.5	0.51096
7640.5	17707.3	298.4	13818.8	7395.5	25706.3	543.4	0.23497
7640.6	18070.5	298.3	14194.4	7395.6	25876.8	543.3	0.35238
7640.7	18482.2	298.2	14617.8	7395.7	25533.9	543.2	0.26537
7640.8	18798.3	298.1	14945	7395.8	25701.2	543.1	0.38025
7640.9	18425.7	298	14582.8	7395.9	25379.3	543	0.30018
7641	19197.9	297.9	15364.6	7396	22971	542.9	-0.60895
7641.1	21513.3	297.8	17688.9	7396.1	21971.7	542.8	-0.95957
7641.2	20335.7	297.7	16519.3	7396.2	24466.1	542.7	0.07597
7641.3	19501	297.6	15691.7	7396.3	25201	542.6	0.412
7641.4	18732.2	297.5	14928.9	7396.4	25421.6	542.5	0.54287
7641.5	19504.3	297.4	15706.2	7396.5	25020.7	542.4	0.42595
7641.6	20011.6	297.3	16217.5	7396.6	24177.9	542.3	0.13245
7641.7	20404.4	297.2	16613.2	7396.7	23463.9	542.2	-0.11107
7641.8	20442.3	297.1	16652.9	7396.8	23587.2	542.1	-0.02346
7641.9	20545	297	16756.3	7396.9	22251.5	542	-0.51633
7642	20370	296.9	16580.8	7397	23081.5	541.9	-0.15081
7642.1	22196.3	296.8	18405.6	7397.1	22528	541.8	-0.33592
7642.2	21656.4	296.7	17863.2	7397.2	23886	541.7	0.23635
7642.3	22436.8	296.6	18640.2	7397.3	23406.1	541.6	0.07747
7642.4	22921.7	296.5	19120.8	7397.4	21579.5	541.5	-0.61765
7642.5	23147.4	296.4	19341.3	7397.5	22435	541.4	-0.24961
7642.6	23581.5	296.3	19769.5	7397.6	24063.7	541.3	0.42368
7642.7	24244.5	296.2	20426	7397.7	23560.9	541.2	0.24901
7642.8	24007.8	296.1	20182.1	7397.8	22968.5	541.1	0.03693
7642.9	25312.9	296	21479.4	7397.9	22654.7	541	-0.06635
7643	25818.7	295.9	21977	7398	21941.8	540.9	-0.32988
7643.1	25599.1	295.8	21748.6	7398.1	22319	540.8	-0.16231
7643.2	25540.1	295.7	21680.5	7398.2	21797.2	540.7	-0.35325
7643.3	25632.9	295.6	21763.8	7398.3	22595.9	540.6	-0.02146
7643.4	26285.8	295.5	22406.9	7398.4	21771	540.5	-0.33571
7643.5	27880.2	295.4	23991.3	7398.5	21664.6	540.4	-0.36609
7643.6	28021.4	295.3	24122.5	7398.6	23119.1	540.3	0.22194
7643.7	28979.8	295.2	25070.6	7398.7	22605.4	540.2	0.02744
7643.8	28151.3	295.1	24231.8	7398.8	21231.3	540.1	-0.50982
7643.9	27129.1	295	23199.3	7398.9	21506.3	540	-0.39337
7644	27554.3	294.9	23614.3	7399	23046.2	539.9	0.22427
7644.1	26781.3	294.8	22831.2	7399.1	23369.1	539.8	0.35786
7644.2	27146.2	294.7	23186.2	7399.2	22652.1	539.7	0.07784
7644.3	25667.2	294.6	21697.5	7399.3	23931.9	539.6	0.58987
7644.4	25000.4	294.5	21021.3	7399.4	22405	539.5	-0.01302
7644.5	24970.7	294.4	20982.5	7399.5	22099.3	539.4	-0.13164
7644.6	24708.5	294.3	20711.5	7399.6	22707	539.3	0.11192
7644.7	24621.2	294.2	20615.7	7399.7	22847.2	539.2	0.16948
7644.8	22955.1	294.1	18941.6	7399.8	22220.7	539.1	-0.07765
7644.9	21461.4	294	17439.9	7399.9	21839.6	539	-0.22757
7645	21956	293.9	17927	7400	22856.5	538.9	0.17739
7645.1	22466.9	293.8	18430.8	7400.1	22708.8	538.8	0.11995
7645.2	20529.1	293.7	16486.2	7400.2	23945.7	538.7	0.61213
7645.3	18693.2	293.6	14643.8	7400.3	23992.6	538.6	0.63185
7645.4	18771.1	293.5	14715.6	7400.4	23413.6	538.5	0.40303
7645.5	17855.5	293.4	13794.2	7400.5	23021.9	538.4	0.24852
7645.6	17872.2	293.3	13805.6	7400.6	22756.2	538.3	0.14402
7645.7	17701.4	293.2	13629.8	7400.7	23383.8	538.2	0.39409
7645.8	16569.2	293.1	12493	7400.8	23724.5	538.1	0.53023
7645.9	15862.6	293	11782.2	7400.9	23919.4	538	0.60849
7646	16744.8	292.9	12660.6	7401	24891.5	537.9	0.99521
7646.1	16619.7	292.8	12532.2	7401.1	25239.1	537.8	1.134
7646.2	16069.4	292.7	11979	7401.2	25702.3	537.7	1.31865
7646.3	14910.2	292.6	10817.3	7401.3	27032.1	537.6	1.84732
7646.4	15272.3	292.5	11177.4	7401.4	28193.7	537.5	2.30918
7646.5	15744.3	292.4	11647.8	7401.5	28225.1	537.4	2.32232
7646.6	17084.4	292.3	12986.7	7401.6	28789.2	537.3	2.54691
7646.7	18016.2	292.2	13917.8	7401.7	32237.1	537.2	3.91639
7646.8	17631.5	292.1	13532.9	7401.8	32573.4	537.1	4.05051
7646.9	17777	292	13678.6	7401.9	34219.7	537	4.70467
7647	18286.2	291.9	14188.7	7402	35399.7	536.9	5.17371
7647.1	19517.2	291.8	15420.9	7402.1	36615.3	536.8	5.65686
7647.2	19531.2	291.7	15436.7	7402.2	38965.1	536.7	6.59028
7647.3	19876.4	291.6	15784.1	7402.3	39666.1	536.6	6.86908
7647.4	19815.1	291.5	15725.6	7402.4	41111.9	536.5	7.44359
7647.5	19895.8	291.4	15809.6	7402.5	45361.2	536.4	9.13104
7647.6	20838	291.3	16755.6	7402.6	50009.9	536.3	10.9771
7647.7	19986	291.2	15908	7402.7	50507.8	536.2	11.1752
7647.8	18021.2	291.1	13948.2	7402.8	54336.6	536.1	12.6958
7647.9	18735.1	291	14667.6	7402.9	54517.3	536	12.768
7648	18230.4	290.9	14169	7403	55987.4	535.9	13.3521
7648.1	17501.4	290.8	13446.7	7403.1	61165	535.8	15.4081
7648.2	16431.3	290.7	12383.8	7403.2	65792.3	535.7	17.2456
7648.3	17085	290.6	13045.3	7403.3	67147.2	535.6	17.784
7648.4	15874.4	290.5	11843.1	7403.4	70855	535.5	19.2565
7648.5	15239.2	290.4	11217	7403.5	73536.6	535.4	20.3215
7648.6	14954.2	290.3	10941.6	7403.6	78663.3	535.3	22.3573
7648.7	15449.5	290.2	11447.2	7403.7	82985.4	535.2	24.0737
7648.8	14404.6	290.1	10413.2	7403.8	85683.6	535.1	25.1454
7648.9	15083.7	290	11103.8	7403.9	87870.6	535	26.0142
7649	14794.4	289.9	10826.6	7404	92887	534.9	28.0062
7649.1	14369.8	289.8	10414.9	7404.1	94258.8	534.8	28.5514
7649.2	13261.1	289.7	9319.68	7404.2	94017.6	534.7	28.4562
7649.3	13459.5	289.6	9532.1	7404.3	94878.7	534.6	28.7986
7649.4	15712.8	289.5	11800.1	7404.4	96680	534.5	29.5144
7649.5	15607.6	289.4	11710.1	7404.5	99346.3	534.4	30.5735
7649.6	16021.2	289.3	12139.3	7404.6	98499	534.3	30.2378
7649.7	17893.4	289.2	14027.7	7404.7	99131.7	534.2	30.4897
7649.8	17866.5	289.1	14017.5	7404.8	102283	534.1	31.7413
7649.9	19237.7	289	15405.8	7404.9	100880	534	31.1852
7650	20573.9	288.9	16759.5	7405	97872.1	533.9	29.9918
7650.1	20913.4	288.8	17116.9	7405.1	93995.4	533.8	28.4535
7650.2	22179.4	288.7	18401.1	7405.2	93522.1	533.7	28.2664
7650.3	22030.7	288.6	18271	7405.3	93370.1	533.6	28.207
7650.4	21701.9	288.5	17961.1	7405.4	89391.3	533.5	26.6283
7650.5	23074.4	288.4	19352.6	7405.5	85943.1	533.4	25.2602
7650.6	25077.5	288.3	21375.1	7405.6	79998.1	533.3	22.9011
7650.7	25781.2	288.2	22098.4	7405.7	79925.4	533.2	22.8732
7650.8	25928	288.1	22264.9	7405.8	74129.4	533.1	20.5733
7650.9	28670.6	288	25027.4	7405.9	70619.4	533	19.1808
7651	30408.8	287.9	26785.7	7406	66967.7	532.9	17.7323
7651.1	30284.7	287.8	26681.7	7406.1	61826.8	532.8	15.6925
7651.2	29713.8	287.7	26131	7406.2	59548.3	532.7	14.7892
7651.3	31130.3	287.6	27567.7	7406.3	53975	532.6	12.5779
7651.4	33457.1	287.5	29914.8	7406.4	51672.4	532.5	11.6651
7651.5	31210.9	287.4	27688.8	7406.5	48322.2	532.4	10.3364
7651.6	31212.9	287.3	27711	7406.6	45218.3	532.3	9.10562
7651.7	31529.3	287.2	28047.5	7406.7	41199.7	532.2	7.51171
7651.8	33514.5	287.1	30052.7	7406.8	40195.2	532.1	7.11446
7651.9	33235.2	287	29793.3	7406.9	36040.4	532	5.46663
7652	31393.1	286.9	27970.9	7407	33623.6	531.9	4.50884
7652.1	32104.5	286.8	28701.9	7407.1	31743.7	531.8	3.76425
7652.2	32352.3	286.7	28969	7407.2	29948.5	531.7	3.05335
7652.3	31151.5	286.6	27787.4	7407.3	29781.5	531.6	2.9889
7652.4	31689.7	286.5	28344.4	7407.4	28904.3	531.5	2.64258
7652.5	31426.5	286.4	28099.7	7407.5	26800.4	531.4	1.80932
7652.6	28535.5	286.3	25227	7407.6	25325.2	531.3	1.22574
7652.7	27450.7	286.2	24160	7407.7	24116.3	531.2	0.74795
7652.8	25606.8	286.1	22333.5	7407.8	23962	531.1	0.68886
7652.9	24878.4	286	21622.2	7407.9	24436.4	531	0.87951
7653	24442.3	285.9	21202.8	7408	22171.6	530.9	-0.01729
7653.1	24444.9	285.8	21221.6	7408.1	21201.9	530.8	-0.39979
7653.2	23394.3	285.7	20186.7	7408.2	21988.6	530.7	-0.08498
7653.3	25233.2	285.6	22040.7	7408.3	22473.1	530.6	0.10997
7653.4	24360.5	285.5	21182.7	7408.4	22691.4	530.5	0.19932
7653.5	23766.9	285.4	20603.1	7408.5	23082.1	530.4	0.35719
7653.6	27012.8	285.3	23862.5	7408.6	24145.4	530.3	0.78215
7653.7	29802.4	285.2	26664.8	7408.7	22042.3	530.2	-0.04983
7653.8	36126.8	285.1	33001.3	7408.8	21489.1	530.1	-0.26644
7653.9	42032.5	285	38918.5	7408.9	21888.3	530	-0.10488
7654	46867	284.9	43763.7	7409	21191.8	529.9	-0.37825
7654.1	54697.8	284.8	51604.5	7409.1	21443.8	529.8	-0.27498
7654.2	60119.1	284.7	57035	7409.2	20307.1	529.7	-0.72301
7654.3	62640.5	284.6	59564.8	7409.3	22019.3	529.6	-0.04002
7654.4	60173.9	284.5	57105.8	7409.4	23142	529.5	0.40898
7654.5	51059.9	284.4	47998.5	7409.5	22277	529.4	0.06889
7654.6	40357.4	284.3	37301.8	7409.6	22317.1	529.3	0.08811
7654.7	28998	284.2	25947.4	7409.7	21321.9	529.2	-0.30371
7654.8	20251.2	284.1	17204.6	7409.8	20758.3	529.1	-0.52415
7654.9	14330.1	284	11286.4	7409.9	21468.2	529	-0.23912
7655	11458.8	283.9	8417.19	7410	22552	528.9	0.19435
7655.1	9236.79	283.8	6196.16	7410.1	21918.1	528.8	-0.05415
7655.2	8006.66	283.7	4965.97	7410.2	22153.5	528.7	0.04236
7655.3	6012.8	283.6	2970.95	7410.3	23175.8	528.6	0.45124
7655.4	5180.24	283.5	2136.12	7410.4	21566.8	528.5	-0.18461
7655.5	5163.23	283.4	2115.71	7410.5	21622.5	528.4	-0.15967
7655.6	5103.03	283.3	2050.94	7410.6	21715.7	528.3	-0.11995
7655.7	4356.96	283.2	1299.11	7410.7	22155.7	528.2	0.05733
7655.8	3776.56	283.1	711.713	7410.8	21744	528.1	-0.10365
7655.9	4012.99	283	939.9	7410.9	21306	528	-0.27519
7656	4094.44	282.9	1011.84	7411	21495.1	527.9	-0.1979
7656.1	3641.22	282.8	547.779	7411.1	20681.9	527.8	-0.51869
7656.2	3214.81	282.7	109.204	7411.2	21687.6	527.7	-0.11756
7656.3	3559.49	282.6	440.359	7411.3	21361.5	527.6	-0.24531
7656.4	3478.29	282.5	344.241	7411.4	21975.6	527.5	0
7656.5	3642.18	282.4	491.792	7411.5	22909.3	527.4	0.37198
7656.6	3459.44	282.3	291.261	7411.6	22408	527.3	0.17408
7656.7	3422.56	282.2	235.12	7411.7	22522.5	527.2	0.22047
7656.8	3764.01	282.1	555.797	7411.8	21967.4	527.1	0.000858411
7656.9	3230.52	282	0	7411.9	22897.7	527	0.37078
7657	3690.25	281.9	435.948	7412	21762.3	526.9	-0.07953
7657.1	3619.04	281.8	339.806	7412.1	22485.2	526.8	0.20771
7657.2	3868.97	281.7	564.067	7412.2	21177.3	526.7	-0.31138
7657.3	4119.46	281.6	788.59	7412.3	20240.4	526.6	-0.68338
7657.4	3705.52	281.5	348.781	7412.4	20805.5	526.5	-0.45919
7657.5	3379.72	281.4	-2.35475	7412.5	22691.9	526.4	0.28941
7657.6	3239.17	281.3	-167.313	7412.6	21986.6	526.3	0.00895
7657.7	3717.51	281.2	287.974	7412.7	21747	526.2	-0.0867
7657.8	3244.92	281.1	-205.889	7412.8	22749.7	526.1	0.3107
7657.9	3438.92	281	-30.9769	7412.9	20740.3	526	-0.48777
7658	3505.4	280.9	19.0226	7413	21566.5	525.9	-0.16062
7658.1	3060.43	280.8	-439.408	7413.1	21350.9	525.8	-0.24717
7658.2	3163.71	280.7	-346.141	7413.2	22514.9	525.7	0.21388
7658.3	3853.12	280.6	337.105	7413.3	23281.8	525.6	0.51722
7658.4	3545.19	280.5	27.2813	7413.4	22373.3	525.5	0.15536
7658.5	3873.36	280.4	358.246	7413.5	22204.6	525.4	0.08712
7658.6	3507.21	280.3	0	7413.6	21755.7	525.3	-0.09239
7658.7	3641.35	280.2	147.407	7413.7	22966.6	525.2	0.38697
7658.8	3131.73	280.1	-343.956	7413.8	22651.9	525.1	0.26059
7658.9	3260.87	280	-192.08	7413.9	22166.9	525	0.06662
7659	3395.22	279.9	-31.0466	7414	22058.7	524.9	0.02217
7659.1	3247.49	279.8	-148.67	7414.1	21243	524.8	-0.30319
7659.2	3533.56	279.7	170.403	7414.2	20804.4	524.7	-0.47886
7659.3	3350.43	279.6	22.6487	7414.3	21768.5	524.6	-0.09765
7659.4	3487.68	279.5	197.114	7414.4	22018.4	524.5	0
7659.5	3287.1	279.4	35.0765	7414.5	22320.6	524.4	0.11841
7659.6	2983.91	279.3	-228.777	7414.6	21990.5	524.3	-0.01419
7659.7	3228.89	279.2	55.8094	7414.7	22305.7	524.2	0.10943
7659.8	3191.22	279.1	57.4921	7414.8	20960.8	524.1	-0.42601
7659.9	3558.53	279	463.377	7414.9	20150.3	524	-0.74925
7660	3116.39	278.9	58.5088	7415	21195.5	523.9	-0.33577
7660.1	2791.06	278.8	-231.383
7660.2	2882.1	278.7	-107.254
7660.3	2663.75	278.6	-295.395
7660.4	2934.21	278.5	1.87237
7660.5	3036.23	278.4	126.763
7660.6	3190.03	278.3	299.135
7660.7	3464.37	278.2	587.83
7660.8	3027.49	278.1	161.244
7660.9	3572.21	278	712.361
7661	3498.53	277.9	641.325
7661.1	2800.85	277.8	-57.2757
7661.2	3201.87	277.7	339.394
7661.3	3368.24	277.6	498.148
7661.4	3785.17	277.5	904.365
7661.5	3463.06	277.4	568.594
7661.6	2885.87	277.3	-25.0286
7661.7	3282.09	277.2	352.123
7661.8	3000.81	277.1	49.323
7661.9	3325.39	277	350.067
7662	3382.39	276.9	381.103
7662.1	3286.5	276.8	257.248
7662.2	3551.08	276.7	492.055
7662.3	3326.68	276.6	236.208
7662.4	3080.71	276.5	-42.719
7662.5	3337.83	276.4	180.107
7662.6	2637.78	276.3	-555.419
7662.7	3309.57	276.2	79.8562
7662.8	3446.52	276.1	179.437
7662.9	3304.16	276	-1.0008
7663	3604.57	275.9	260.78
7663.1	3496.57	275.8	113.768
7663.2	3235.06	275.7	-186.978
7663.3	3456.84	275.6	-4.50921
7663.4	3697.56	275.5	196.995
7663.5	3746.23	275.4	206.701
7663.6	4139.05	275.3	560.967
7663.7	4176.83	275.2	560.767
7663.8	3875.79	275.1	222.48
7663.9	3654.05	275	-35.623
7664	3362.25	274.9	-362.733

## Sheet: graphite
This file contains the raw data (intensity as a function of kinetic energy) and the processed data (intensity as a function of binding energy, normalised when necessary), with each tab corresponding to a different material, arranged in the same order and labeled using the abbreviations listed in Table S1.
Supplementary Information for: X‑Ray Photoelectron Spectroscopy Analysis of Reference Compounds for Studying Rechargeable Li‑, Na‑, and K‑ion Batteries
C1s
Raw data		Processed data
Kinetic energy / eV	Intensity / a.u.	Binding energy / eV	Intensity / a.u.
7639	7050.23	299.95	0
7639.1	7181.3	299.85	0.04783
7639.2	6288.46	299.75	-0.27399
7639.3	6679.33	299.65	-0.13246
7639.4	6903.07	299.55	-0.05133
7639.5	7210.51	299.45	0.0599
7639.6	7174.73	299.35	0.0471
7639.7	6961.65	299.25	-0.02987
7639.8	7362.53	299.15	0.11462
7639.9	7035.09	299.05	-0.00403
7640	6487.14	298.95	-0.20252
7640.1	7322.83	298.85	0.09822
7640.2	7598.39	298.75	0.19645
7640.3	7137.27	298.65	0.02842
7640.4	5956.64	298.55	-0.39969
7640.5	6741.21	298.45	-0.11874
7640.6	6982.37	298.35	-0.03436
7640.7	6558.8	298.25	-0.19037
7640.8	6684.42	298.15	-0.14858
7640.9	6912.25	298.05	-0.07037
7641	7137.25	297.95	0.00631
7641.1	6957.92	297.85	-0.0635
7641.2	7106.86	297.75	-0.01536
7641.3	7071.76	297.65	-0.03425
7641.4	7302.53	297.55	0.04223
7641.5	6910.16	297.45	-0.10689
7641.6	7228.77	297.35	0
7641.7	7199.46	297.25	-0.0194
7641.8	7297.78	297.15	0.00656
7641.9	7031.93	297.05	-0.09964
7642	7259.66	296.95	-0.02838
7642.1	7404.14	296.85	0.0121
7642.2	7245.6	296.75	-0.05755
7642.3	6791.27	296.65	-0.23472
7642.4	7071.21	296.55	-0.14757
7642.5	6590.35	296.45	-0.33583
7642.6	7604.92	296.35	0.01498
7642.7	7185.11	296.25	-0.1528
7642.8	7539.42	296.15	-0.04191
7642.9	7958.97	296.05	0.09174
7643	6933.5	295.95	-0.29707
7643.1	7020.4	295.85	-0.28513
7643.2	7594.57	295.75	-0.09811
7643.3	7464.6	295.65	-0.16612
7643.4	7640.68	295.55	-0.12449
7643.5	7773.82	295.45	-0.0992
7643.6	8059.65	295.35	-0.01966
7643.7	8834.05	295.25	0.23539
7643.8	8496.8	295.15	0.08826
7643.9	8781.4	295.05	0.16473
7644	8956.84	294.95	0.2009
7644.1	8797.73	294.85	0.11539
7644.2	8840.28	294.75	0.10178
7644.3	8641.18	294.65	0
7644.4	8646.02	294.55	-0.02904
7644.5	8513.41	294.45	-0.10844
7644.6	8685.29	294.35	-0.07842
7644.7	9213.81	294.25	0.08004
7644.8	9447	294.15	0.13178
7644.9	9761.77	294.05	0.21308
7645	9107.33	293.95	-0.05519
7645.1	9328.37	293.85	-0.00689
7645.2	9853.22	293.75	0.15181
7645.3	10177.9	293.65	0.23917
7645.4	9897.48	293.55	0.10926
7645.5	9640.65	293.45	-0.0108
7645.6	9386.64	293.35	-0.12829
7645.7	10491.9	293.25	0.24668
7645.8	9598.54	293.15	-0.09787
7645.9	10076.9	293.05	0.05481
7646	11284.7	292.95	0.47285
7646.1	10781.2	292.85	0.27507
7646.2	10082.1	292.75	0.00868
7646.3	11668.2	292.65	0.56915
7646.4	12216.2	292.55	0.75679
7646.5	12260.7	292.45	0.7645
7646.6	12406.7	292.35	0.8107
7646.7	12920.2	292.25	0.99137
7646.8	14301.1	292.15	1.48692
7646.9	14720.9	292.05	1.63726
7647	13950.1	291.95	1.35951
7647.1	14768.6	291.85	1.65715
7647.2	15313.1	291.75	1.85753
7647.3	15979.5	291.65	2.10354
7647.4	16867.3	291.55	2.43106
7647.5	16453	291.45	2.29005
7647.6	16318.6	291.35	2.25164
7647.7	17096.8	291.25	2.54412
7647.8	16486.2	291.15	2.33669
7647.9	17048.8	291.05	2.55423
7648	17860	290.95	2.86294
7648.1	17690.3	290.85	2.81885
7648.2	16303.2	290.75	2.33663
7648.3	16612.4	290.65	2.46807
7648.4	15781.8	290.55	2.18928
7648.5	15470.1	290.45	2.09908
7648.6	14854.2	290.35	1.90025
7648.7	14677.5	290.25	1.86113
7648.8	14043.2	290.15	1.658
7648.9	13664	290.05	1.548
7649	13445.8	289.95	1.49723
7649.1	12977.2	289.85	1.35713
7649.2	11946.3	289.75	1.01502
7649.3	11814.5	289.65	0.99848
7649.4	12629.1	289.55	1.32451
7649.5	13185.1	289.45	1.55815
7649.6	12656	289.35	1.4009
7649.7	12874.6	289.25	1.51448
7649.8	11625.9	289.15	1.09913
7649.9	10493.3	289.05	0.72654
7650	12126.6	288.95	1.35316
7650.1	12720.8	288.85	1.60539
7650.2	12261.8	288.75	1.47812
7650.3	12437.5	288.65	1.58066
7650.4	12505.8	288.55	1.64504
7650.5	12639.3	288.45	1.73355
7650.6	12380.7	288.35	1.68108
7650.7	12809.1	288.25	1.87716
7650.8	12748.5	288.15	1.89724
7650.9	13454.2	288.05	2.19441
7651	13235.7	287.95	2.1584
7651.1	13764.1	287.85	2.39241
7651.2	13283.6	287.75	2.26259
7651.3	13703.6	287.65	2.45819
7651.4	15179.1	287.55	3.03517
7651.5	14277.3	287.45	2.75422
7651.6	14675.2	287.35	2.94269
7651.7	15903.9	287.25	3.43134
7651.8	16318.2	287.15	3.62614
7651.9	17100.7	287.05	3.95404
7652	17987.2	286.95	4.31961
7652.1	18706.3	286.85	4.62485
7652.2	18095.5	286.75	4.45007
7652.3	19565	286.65	5.02627
7652.4	22794.2	286.55	6.23775
7652.5	23334.9	286.45	6.47867
7652.6	23038.3	286.35	6.41723
7652.7	23842.9	286.25	6.75323
7652.8	25597.1	286.15	7.4319
7652.9	27267.7	286.05	8.08026
7653	28416.3	285.95	8.53998
7653.1	28505.7	285.85	8.61711
7653.2	30702.2	285.75	9.45466
7653.3	33395.8	285.65	10.4714
7653.4	35940.5	285.55	11.434
7653.5	41564.2	285.45	13.5078
7653.6	49369.1	285.35	16.3686
7653.7	63506.6	285.25	21.5151
7653.8	82840.5	285.15	28.5371
7653.9	115005	285.05	40.1905
7654	158209	284.95	55.8284
7654.1	207959	284.85	73.8291
7654.2	258193	284.75	92.0041
7654.3	289163	284.65	103.224
7654.4	289528	284.55	103.395
7654.5	249076	284.45	88.8301
7654.6	182349	284.35	64.7794
7654.7	110614	284.25	38.9199
7654.8	59098.5	284.15	20.3591
7654.9	30578.3	284.05	10.0988
7655	15413	283.95	4.65882
7655.1	9419.85	283.85	2.52909
7655.2	6414.6	283.75	1.4771
7655.3	5725.8	283.65	1.26045
7655.4	4619.7	283.55	0.89219
7655.5	3177.28	283.45	0.40155
7655.6	2428.76	283.35	0.16039
7655.7	2272.09	283.25	0.13185
7655.8	2221.57	283.15	0.14055
7655.9	2181.93	283.05	0.15208
7656	1733.93	282.95	0.01505
7656.1	1441.91	282.85	-0.06684
7656.2	1448.93	282.75	-0.04197
7656.3	1291.28	282.65	-0.07779
7656.4	1367.34	282.55	-0.0305
7656.5	1157.09	282.45	-0.08786
7656.6	994.739	282.35	-0.12924
7656.7	988.183	282.25	-0.11563
7656.8	863.812	282.15	-0.14571
7656.9	1209.7	282.05	-0.00712
7657	1104.82	281.95	-0.03226
7657.1	1029.12	281.85	-0.0478
7657.2	1037.65	281.75	-0.03377
7657.3	893.756	281.65	-0.07553
7657.4	895.77	281.55	-0.06531
7657.5	799.641	281.45	-0.09111
7657.6	719.472	281.35	-0.11167
7657.7	777.973	281.25	-0.08262
7657.8	790.862	281.15	-0.07039
7657.9	742.214	281.05	-0.08065
7658	580.113	280.95	-0.13207
7658.1	505.898	280.85	-0.15188
7658.2	550.875	280.75	-0.1287
7658.3	888.004	280.65	0
7658.4	832.913	280.55	-0.01279
7658.5	463.494	280.45	-0.13895
7658.6	465.628	280.35	-0.13091
7658.7	545.762	280.25	-0.09466
7658.8	758.354	280.15	-0.01056
7658.9	864.154	280.05	0.03497
7659	897.989	279.95	0.05451
7659.1	719.347	279.85	-0.00272
7659.2	702.25	279.75	-0.00171
7659.3	752.186	279.65	0.0234
7659.4	877.339	279.55	0.07553
7659.5	796.681	279.45	0.05321
7659.6	675.953	279.35	0.01625
7659.7	507.134	279.25	-0.03828
7659.8	795.517	279.15	0.072
7659.9	700.858	279.05	0.04375
7660	605.556	278.95	0.01499
7660.1	637.03	278.85	0.03169
7660.2	720.647	278.75	0.06689
7660.3	656.672	278.65	0.0485
7660.4	638.153	278.55	0.04622
7660.5	448.383	278.45	-0.01818
7660.6	506.375	278.35	0.00657
7660.7	466.266	278.25	-0.00436
7660.8	546.937	278.15	0.02803
7660.9	427.748	278.05	-0.01199
7661	541.458	277.95	0.03182
7661.1	554.794	277.85	0.03914
7661.2	582.968	277.75	0.05159
7661.3	453.168	277.65	0.00678
7661.4	429.916	277.55	0.00020576
7661.5	386.371	277.45	-0.0139
7661.6	420.539	277.35	-0.000163009
7661.7	743.287	277.25	0.11756
7661.8	808.701	277.15	0.14219
7661.9	346.431	277.05	-0.02384
7662	354.691	276.95	-0.02019
7662.1	398.241	276.85	-0.00397
7662.2	553.445	276.75	0.05241
7662.3	477.315	276.65	0.02513
7662.4	578.009	276.55	0.06155
7662.5	479.76	276.45	0.02601
7662.6	605.415	276.35	0.07118
7662.7	650.359	276.25	0.0871
7662.8	441.893	276.15	0.01143
7662.9	705.592	276.05	0.10612
7663	561.468	275.95	0.05349
7663.1	521.485	275.85	0.03837
7663.2	492.564	275.75	0.02718
7663.3	588.591	275.65	0.06102
7663.4	653.216	275.55	0.08348
7663.5	559.671	275.45	0.04878
7663.6	707.97	275.35	0.10135
7663.7	578.317	275.25	0.05354
7663.8	640.558	275.15	0.07498
7663.9	475.514	275.05	0.01436
7664	438.638	274.95	0

## Sheet: HC
This file contains the raw data (intensity as a function of kinetic energy) and the processed data (intensity as a function of binding energy, normalised when necessary), with each tab corresponding to a different material, arranged in the same order and labeled using the abbreviations listed in Table S1.
Supplementary Information for: X‑Ray Photoelectron Spectroscopy Analysis of Reference Compounds for Studying Rechargeable Li‑, Na‑, and K‑ion Batteries
C1s
Raw data		Processed data
Kinetic energy / eV	Intensity / a.u.	Binding energy / eV	Intensity / a.u.
7639	6255.43	299.83	0
7639.07	5989.53	299.755	-0.12049
7639.15	5924.12	299.68	-0.137
7639.23	5990.38	299.605	-0.08527
7639.3	5600.1	299.53	-0.27047
7639.38	5940.37	299.455	-0.0768
7639.45	5804.97	299.38	-0.13006
7639.52	5687.92	299.305	-0.17397
7639.6	5604.96	299.23	-0.20042
7639.68	5920.79	299.155	-0.02024
7639.75	6324.04	299.08	0.20503
7639.82	5910.36	299.005	0.00616
7639.9	5457.78	298.93	-0.21322
7639.98	5485.82	298.855	-0.18363
7640.05	5597.57	298.78	-0.11102
7640.12	5882.1	298.705	0.0508
7640.2	5811.17	298.63	0.02774
7640.27	5855.92	298.555	0.0642
7640.35	5659.09	298.48	-0.0252
7640.43	5462.81	298.405	-0.11487
7640.5	5369.79	298.33	-0.15155
7640.57	5538.98	298.255	-0.05283
7640.65	5925.13	298.18	0.15781
7640.73	5692.8	298.105	0.0469
7640.8	5249.56	298.03	-0.17414
7640.88	5197.39	297.955	-0.19304
7640.95	5110.21	297.88	-0.23088
7641.02	5673.22	297.805	0.0678
7641.1	5563.86	297.73	0.01682
7641.18	5161.35	297.655	-0.18712
7641.25	5029.04	297.58	-0.25177
7641.32	5555.36	297.505	0.02434
7641.4	5503.38	297.43	-0.00053008
7641.48	5350.84	297.355	-0.07856
7641.55	5502.1	297.28	0
7641.62	6115.64	297.205	0.31734
7641.7	5756.74	297.13	0.12914
7641.77	5661.05	297.055	0.07647
7641.85	5463.91	296.98	-0.02985
7641.93	5474.08	296.905	-0.02964
7642	5588.23	296.83	0.02352
7642.07	5842.96	296.755	0.14862
7642.15	5839.42	296.68	0.13876
7642.23	5765.14	296.605	0.09123
7642.3	5809.05	296.53	0.10406
7642.38	5595.85	296.455	-0.01744
7642.45	5370.53	296.38	-0.14617
7642.52	5775.06	296.305	0.05095
7642.6	5886.06	296.23	0.09487
7642.68	5707.86	296.155	-0.01216
7642.75	5833.89	296.08	0.03777
7642.82	5699.13	296.005	-0.04849
7642.9	5877.02	295.93	0.02659
7642.98	6119	295.855	0.13405
7643.05	5809.92	295.78	-0.04521
7643.12	5602.06	295.705	-0.17272
7643.2	5887.61	295.63	-0.0449
7643.27	5876.69	295.555	-0.07141
7643.35	6085.94	295.48	0.01589
7643.43	6034.72	295.405	-0.03224
7643.5	6225.56	295.33	0.04503
7643.57	6310.01	295.255	0.06705
7643.65	6258.41	295.18	0.01853
7643.73	6595.22	295.105	0.17169
7643.8	7157.09	295.03	0.4419
7643.88	6421.17	294.955	0.03922
7643.95	6120.87	294.88	-0.13694
7644.02	6606.86	294.805	0.09545
7644.1	6801.67	294.73	0.17753
7644.18	6494.4	294.655	0
7644.25	6446.18	294.58	-0.04217
7644.32	5732	294.505	-0.42887
7644.4	6193.79	294.43	-0.20452
7644.48	6386.08	294.355	-0.11903
7644.55	6202.03	294.28	-0.22783
7644.62	5960.36	294.205	-0.3656
7644.7	7182.99	294.13	0.25722
7644.77	6782.62	294.055	0.03896
7644.85	6613.74	293.98	-0.05831
7644.93	6612.99	293.905	-0.06746
7645	6863.59	293.83	0.05467
7645.07	6732.25	293.755	-0.02047
7645.15	6610.79	293.68	-0.08963
7645.23	6574.11	293.605	-0.11394
7645.3	6847.35	293.53	0.02336
7645.38	7154.29	293.455	0.17899
7645.45	7159.3	293.38	0.1788
7645.52	7242.8	293.305	0.22014
7645.6	7282.45	293.23	0.23954
7645.68	7129.01	293.155	0.15955
7645.75	7783.1	293.08	0.49929
7645.82	7868.72	293.005	0.54489
7645.9	7862.17	292.93	0.54342
7645.98	8126.89	292.855	0.68345
7646.05	7728.65	292.78	0.48028
7646.12	7739.94	292.705	0.4903
7646.2	7988.12	292.63	0.62395
7646.27	7506.61	292.555	0.37975
7646.35	7838.09	292.48	0.55803
7646.43	8734.79	292.405	1.03023
7646.5	8920.34	292.33	1.13417
7646.57	8462.59	292.255	0.90506
7646.65	8671.12	292.18	1.02226
7646.73	9288.83	292.105	1.3524
7646.8	9194.79	292.03	1.31393
7646.88	9657.47	291.955	1.56491
7646.95	9837.11	291.88	1.66968
7647.02	10167.5	291.805	1.85326
7647.1	10031.1	291.73	1.7953
7647.18	10339.1	291.655	1.96844
7647.25	10017.9	291.58	1.8158
7647.32	9652.1	291.505	1.64056
7647.4	10066	291.43	1.87037
7647.48	10869.4	291.355	2.30286
7647.55	10699	291.28	2.23062
7647.62	10403	291.205	2.09379
7647.7	10537.4	291.13	2.18079
7647.77	10876.2	291.055	2.37433
7647.85	11431.3	290.98	2.68057
7647.93	11471.8	290.905	2.72034
7648	11005.2	290.83	2.49755
7648.07	10839.7	290.755	2.43138
7648.15	11260.4	290.68	2.66983
7648.23	11130.8	290.605	2.62323
7648.3	11486.8	290.53	2.82902
7648.38	11786.1	290.455	3.00581
7648.45	11781.8	290.38	3.02551
7648.52	11862.4	290.305	3.08967
7648.6	12142.3	290.23	3.25766
7648.68	11690.7	290.155	3.04649
7648.75	11128	290.08	2.77814
7648.82	10607.9	290.005	2.53222
7648.9	10175.2	289.93	2.33197
7648.98	10371.7	289.855	2.45855
7649.05	10711.8	289.78	2.65997
7649.12	11230.7	289.705	2.95447
7649.2	10871.2	289.63	2.7936
7649.27	10241	289.555	2.49261
7649.35	10552.3	289.48	2.68031
7649.43	10756.1	289.405	2.81257
7649.5	10481.2	289.33	2.69681
7649.57	10696.8	289.255	2.83572
7649.65	10186.2	289.18	2.59819
7649.73	10166.2	289.105	2.61541
7649.8	10176.7	289.03	2.64874
7649.88	9635.82	288.955	2.39622
7649.95	10022.6	288.88	2.6252
7650.02	10163.3	288.805	2.7267
7650.1	10299.7	288.73	2.8262
7650.18	9535.2	288.655	2.4585
7650.25	9420.11	288.58	2.4279
7650.32	9415.38	288.505	2.45472
7650.4	9636.23	288.43	2.59874
7650.48	10441.7	288.355	3.0462
7650.55	10338.5	288.28	3.02241
7650.62	10205.8	288.205	2.98345
7650.7	10174.4	288.13	2.99714
7650.77	10307.9	288.055	3.09652
7650.85	9720.54	287.98	2.82202
7650.93	10147.3	287.905	3.07375
7651	10368.1	287.83	3.21865
7651.07	10112.2	287.755	3.11639
7651.15	11217.9	287.68	3.72054
7651.23	12168.1	287.605	4.24406
7651.3	11851.4	287.53	4.1104
7651.38	11787.6	287.455	4.10795
7651.45	12610.9	287.38	4.56577
7651.52	13495.3	287.305	5.05531
7651.6	13566.7	287.23	5.12303
7651.68	13856.9	287.155	5.30427
7651.75	15206	287.08	6.0349
7651.82	15174.3	287.005	6.04909
7651.9	15516.8	286.93	6.25741
7651.98	16801	286.855	6.95419
7652.05	18172.1	286.78	7.69605
7652.12	18552.4	286.705	7.92379
7652.2	19507.9	286.63	8.44988
7652.27	19923.4	286.555	8.69573
7652.35	20047.3	286.48	8.7902
7652.43	21667.6	286.405	9.66087
7652.5	22432.2	286.33	10.0875
7652.57	22426.3	286.255	10.1143
7652.65	23541.9	286.18	10.7228
7652.73	24138.7	286.105	11.062
7652.8	24133.9	286.03	11.0889
7652.88	24578.8	285.955	11.3489
7652.95	24998.7	285.88	11.5958
7653.02	25977.7	285.805	12.1326
7653.1	27733	285.73	13.0719
7653.18	30403.8	285.655	14.486
7653.25	32807.3	285.58	15.7612
7653.32	34624.7	285.505	16.7321
7653.4	37828.2	285.43	18.4219
7653.48	42778.8	285.355	21.0177
7653.55	49526.8	285.28	24.5459
7653.62	57839.9	285.205	28.8857
7653.7	67862.4	285.13	34.112
7653.77	77125.7	285.055	38.9442
7653.85	89004.2	284.98	45.1329
7653.93	102268	284.905	52.0402
7654	118217	284.83	60.3396
7654.07	129353	284.755	66.1424
7654.15	136908	284.68	70.0863
7654.23	138674	284.605	71.0271
7654.3	134091	284.53	68.674
7654.38	123707	284.455	63.3107
7654.45	108420	284.38	55.403
7654.52	90628.2	284.305	46.196
7654.6	73020.2	284.23	37.0838
7654.68	55165	284.155	27.8429
7654.75	41100.5	284.08	20.5682
7654.82	30003	284.005	14.8323
7654.9	22705.2	283.93	11.0672
7654.98	18146.6	283.855	8.72282
7655.05	15440.9	283.78	7.33921
7655.12	12821.8	283.705	6.00007
7655.2	9070.03	283.63	4.07281
7655.27	7071.48	283.555	3.05463
7655.35	5598.84	283.48	2.3088
7655.43	4321.49	283.405	1.66378
7655.5	3173.49	283.33	1.08535
7655.57	2510.55	283.255	0.75803
7655.65	1979.54	283.18	0.49863
7655.73	1908.05	283.105	0.47708
7655.8	1698.09	283.03	0.38313
7655.88	1354.82	282.955	0.21946
7655.95	1113	282.88	0.10785
7656.02	1272.78	282.805	0.20399
7656.1	1275.75	282.73	0.21819
7656.18	1032.58	282.655	0.10409
7656.25	1033.98	282.58	0.11625
7656.32	883.418	282.505	0.04896
7656.4	935.283	282.43	0.08604
7656.48	752.054	282.355	0.000513427
7656.55	734.866	282.28	0.000472669
7656.62	658.766	282.205	-0.0308
7656.7	685.095	282.13	-0.00957
7656.77	725.713	282.055	0.01847
7656.85	708.859	281.98	0.01614
7656.93	724.435	281.905	0.03013
7657	712.335	281.83	0.0293
7657.07	705.282	281.755	0.03069
7657.15	627.402	281.68	-0.00503
7657.23	636.63	281.605	0.00413
7657.3	592.018	281.53	-0.01491
7657.38	625.983	281.455	0.0066
7657.45	593.865	281.38	-0.00635
7657.52	587.361	281.305	-0.00613
7657.6	650.184	281.23	0.02998
7657.68	578.474	281.155	-0.00373
7657.75	564.246	281.08	-0.0076
7657.82	710.728	281.005	0.07198
7657.9	539.916	280.93	-0.01294
7657.98	494.167	280.855	-0.03281
7658.05	542.257	280.78	-0.00379
7658.12	518.985	280.705	-0.01153
7658.2	555.187	280.63	0.01189
7658.27	522.648	280.555	0
7658.35	471.132	280.48	-0.02134
7658.43	558.469	280.405	0.02973
7658.5	622.459	280.33	0.06903
7658.57	596.032	280.255	0.06174
7658.65	456.214	280.18	-0.00409
7658.73	408.603	280.105	-0.02182
7658.8	450.858	280.03	0.00731
7658.88	590.661	279.955	0.08724
7658.95	627.785	279.88	0.11408
7659.02	452.412	279.805	0.03083
7659.1	392.389	279.73	0.00754
7659.18	598.11	279.655	0.1222
7659.25	438.516	279.58	0.04741
7659.32	420.897	279.505	0.0463
7659.4	495.21	279.43	0.09289
7659.48	523.194	279.355	0.11542
7659.55	433.24	279.28	0.07672
7659.62	575.15	279.205	0.15822
7659.7	462.148	279.13	0.10737
7659.77	526.283	279.055	0.14829
7659.85	438.575	278.98	0.11026
7659.93	395.677	278.905	0.09528
7660	459.036	278.83	0.13521
7660.07	526.842	278.755	0.17719
7660.15	554.519	278.68	0.19808
7660.23	627.263	278.605	0.24204
7660.3	558.834	278.53	0.21242
7660.38	431.802	278.455	0.15204
7660.45	449.801	278.38	0.1665
7660.52	392.502	278.305	0.14149
7660.6	321.258	278.23	0.10878
7660.68	525.026	278.155	0.21828
7660.75	488.322	278.08	0.20254
7660.82	374.602	278.005	0.14637
7660.9	361.451	277.93	0.14191
7660.98	395.725	277.855	0.1616
7661.05	361.629	277.78	0.14539
7661.12	501.1	277.705	0.21879
7661.2	598.364	277.63	0.26988
7661.27	563.164	277.555	0.25184
7661.35	629.75	277.48	0.28621
7661.43	442.06	277.405	0.18828
7661.5	402.99	277.33	0.16708
7661.57	396.954	277.255	0.16265
7661.65	532.764	277.18	0.23147
7661.73	474.448	277.105	0.19922
7661.8	457.899	277.03	0.18832
7661.88	498.661	276.955	0.20683
7661.95	480.268	276.88	0.19435
7662.02	471.908	276.805	0.18677
7662.1	383.684	276.73	0.13747
7662.18	395.871	276.655	0.14
7662.25	398.091	276.58	0.13708
7662.32	399.362	276.505	0.13343
7662.4	558.745	276.43	0.21155
7662.48	540.8	276.355	0.19746
7662.55	420.178	276.28	0.12987
7662.62	402.531	276.205	0.11549
7662.7	498.398	276.13	0.15981
7662.77	660.73	276.055	0.23843
7662.85	474.365	275.98	0.13596
7662.93	428.237	275.905	0.10609
7663	491.996	275.83	0.13307
7663.07	465.698	275.755	0.11319
7663.15	541.106	275.68	0.14594
7663.23	663.316	275.605	0.20284
7663.3	461.49	275.53	0.09153
7663.38	374.207	275.455	0.03955
7663.45	286.535	275.38	-0.01272
7663.52	369.245	275.305	0.02332
7663.6	450.62	275.23	0.0586
7663.68	371.757	275.155	0.0107
7663.75	358.101	275.08	-0.00341
7663.82	349.045	275.005	-0.01518
7663.9	368.691	274.93	-0.01207
7663.98	405.639	274.855	0

## Sheet: KB
This file contains the raw data (intensity as a function of kinetic energy) and the processed data (intensity as a function of binding energy, normalised when necessary), with each tab corresponding to a different material, arranged in the same order and labeled using the abbreviations listed in Table S1.
Supplementary Information for: X‑Ray Photoelectron Spectroscopy Analysis of Reference Compounds for Studying Rechargeable Li‑, Na‑, and K‑ion Batteries
C1s
Raw data		Processed data
Kinetic energy / eV	Intensity / a.u.	Binding energy / eV	Intensity / a.u.
7639	8456.73	299.95	0
7639.1	8333.44	299.85	-0.06864
7639.2	8936.52	299.75	0.27166
7639.3	9187.31	299.65	0.41362
7639.4	8825.63	299.55	0.21074
7639.5	8830.32	299.45	0.21412
7639.6	9205.98	299.35	0.42633
7639.7	8979	299.25	0.29922
7639.8	8548.32	299.15	0.05741
7639.9	8803.76	299.05	0.20186
7640	9014.1	298.95	0.32088
7640.1	8470.13	298.85	0.01517
7640.2	8277.42	298.75	-0.09281
7640.3	9172.41	298.65	0.41153
7640.4	8910.53	298.55	0.26451
7640.5	7914.32	298.45	-0.296
7640.6	8527.31	298.35	0.04941
7640.7	8704.05	298.25	0.14915
7640.8	8776.15	298.15	0.18991
7640.9	8168.19	298.05	-0.15227
7641	8682.44	297.95	0.13727
7641.1	8637.3	297.85	0.1118
7641.2	8596.83	297.75	0.08887
7641.3	8565.34	297.65	0.07091
7641.4	8759.64	297.55	0.17999
7641.5	8440.68	297.45	0
7641.6	7944.5	297.35	-0.27987
7641.7	7644.53	297.25	-0.44941
7641.8	7183.8	297.15	-0.70966
7641.9	7564.49	297.05	-0.49641
7642	7872.18	296.95	-0.32453
7642.1	8340.69	296.85	-0.06242
7642.2	8194.91	296.75	-0.14653
7642.3	8193.42	296.65	-0.1498
7642.4	8077.34	296.55	-0.21804
7642.5	8790.52	296.45	0.18011
7642.6	8841.31	296.35	0.2048
7642.7	8379.89	296.25	-0.05947
7642.8	8175.78	296.15	-0.1795
7642.9	8540.26	296.05	0.01993
7643	8630.29	295.95	0.06413
7643.1	8287.04	295.85	-0.13636
7643.2	8690.88	295.75	0.08296
7643.3	8561.59	295.65	0.00129
7643.4	8185.74	295.55	-0.22007
7643.5	7881.12	295.45	-0.40227
7643.6	7947.06	295.35	-0.37681
7643.7	8573.91	295.25	-0.03657
7643.8	9342.76	295.15	0.38256
7643.9	9086.57	295.05	0.22354
7644	8982.35	294.95	0.14915
7644.1	9388.78	294.85	0.36145
7644.2	9788.52	294.75	0.56929
7644.3	8958.11	294.65	0.08398
7644.4	9511.74	294.55	0.37744
7644.5	9256.45	294.45	0.21514
7644.6	9045.56	294.35	0.07763
7644.7	10050.3	294.25	0.62441
7644.8	9790.73	294.15	0.45944
7644.9	10511	294.05	0.84627
7645	9356.82	293.95	0.17803
7645.1	8822.83	293.85	-0.14065
7645.2	9363.57	293.75	0.14626
7645.3	10025.2	293.65	0.50183
7645.4	9611.47	293.55	0.25277
7645.5	9293.12	293.45	0.05826
7645.6	9431.32	293.35	0.12177
7645.7	9923.05	293.25	0.38543
7645.8	10024	293.15	0.43032
7645.9	9864.9	293.05	0.33013
7646	9404.29	292.95	0.06167
7646.1	9544.83	292.85	0.13324
7646.2	9800.31	292.75	0.27123
7646.3	9222.63	292.65	-0.05801
7646.4	10367.1	292.55	0.58426
7646.5	10152.4	292.45	0.4633
7646.6	10253.4	292.35	0.52204
7646.7	10448.8	292.25	0.63576
7646.8	11070.8	292.15	0.99159
7646.9	10618.7	292.05	0.7445
7647	10193.7	291.95	0.51447
7647.1	10845.2	291.85	0.89231
7647.2	11841.2	291.75	1.46574
7647.3	11360	291.65	1.20921
7647.4	12647.4	291.55	1.95006
7647.5	13015.5	291.45	2.17491
7647.6	12350.4	291.35	1.81967
7647.7	12806.8	291.25	2.09732
7647.8	12857.8	291.15	2.14824
7647.9	13801.9	291.05	2.70339
7648	13618.2	290.95	2.625
7648.1	14202.7	290.85	2.9805
7648.2	13408.8	290.75	2.56132
7648.3	13916.5	290.65	2.87618
7648.4	14609.9	290.55	3.29688
7648.5	14746.2	290.45	3.40515
7648.6	15658.7	290.35	3.95162
7648.7	14876.1	290.25	3.54483
7648.8	14495.1	290.15	3.36532
7648.9	13573.7	290.05	2.88256
7649	13243	289.95	2.73342
7649.1	13425.7	289.85	2.87432
7649.2	12467.9	289.75	2.37408
7649.3	13657.5	289.65	3.08369
7649.4	13071.1	289.55	2.79433
7649.5	13538.8	289.45	3.09926
7649.6	14225.9	289.35	3.52852
7649.7	12919.4	289.25	2.83613
7649.8	13220.4	289.15	3.0495
7649.9	14196	289.05	3.64332
7650	14512.4	288.95	3.86671
7650.1	14227.7	288.85	3.75225
7650.2	14043.7	288.75	3.69509
7650.3	13856.1	288.65	3.63636
7650.4	14806.4	288.55	4.21884
7650.5	15128.9	288.45	4.44826
7650.6	14911.3	288.35	4.37406
7650.7	15627.2	288.25	4.8258
7650.8	15685.8	288.15	4.90781
7650.9	15870.9	288.05	5.06136
7651	16419.9	287.95	5.42006
7651.1	15661.4	287.85	5.04281
7651.2	15582.4	287.75	5.04838
7651.3	16034.1	287.65	5.35281
7651.4	17186.6	287.55	6.05195
7651.5	16079.1	287.45	5.4788
7651.6	15361.4	287.35	5.1251
7651.7	15495.4	287.25	5.2509
7651.8	15749.6	287.15	5.44438
7651.9	16413.3	287.05	5.8683
7652	17430	286.95	6.49087
7652.1	18617.6	286.85	7.20947
7652.2	20726.1	286.75	8.44637
7652.3	21230.5	286.65	8.77987
7652.4	21264.6	286.55	8.84839
7652.5	20498	286.45	8.46578
7652.6	23134.2	286.35	9.99861
7652.7	24393.8	286.25	10.756
7652.8	24228	286.15	10.7105
7652.9	25997	286.05	11.7539
7653	29143	285.95	13.5719
7653.1	29932.2	285.85	14.0626
7653.2	31195.2	285.75	14.8194
7653.3	31858	285.65	15.2378
7653.4	35444.5	285.55	17.3015
7653.5	38316.8	285.45	18.9624
7653.6	43746.4	285.35	22.0623
7653.7	50244.5	285.25	25.7631
7653.8	55756	285.15	28.9076
7653.9	65658.4	285.05	34.5234
7654	78357.5	284.95	41.7128
7654.1	90712.8	284.85	48.7077
7654.2	103948	284.75	56.1972
7654.3	113616	284.65	61.6768
7654.4	113807	284.55	61.8204
7654.5	106078	284.45	57.5038
7654.6	95742.5	284.35	51.7188
7654.7	77483.1	284.25	41.4714
7654.8	59225.8	284.15	31.2239
7654.9	42657.4	284.05	21.9261
7655	29851.6	283.95	14.7453
7655.1	21732.4	283.85	10.2018
7655.2	18124.3	283.75	8.19675
7655.3	13740.8	283.65	5.75373
7655.4	10907.3	283.55	4.18201
7655.5	8028.27	283.45	2.58314
7655.6	6830.27	283.35	1.92923
7655.7	5384.04	283.25	1.13402
7655.8	4621.14	283.15	0.72198
7655.9	4345.71	283.05	0.58277
7656	3451.94	282.95	0.0938
7656.1	3263.06	282.85	0
7656.2	3522.47	282.75	0.15689
7656.3	3240.52	282.65	0.0074
7656.4	3318.7	282.55	0.05918
7656.5	3464.51	282.45	0.14767
7656.6	3621.72	282.35	0.24133
7656.7	3448.85	282.25	0.14803
7656.8	3874.33	282.15	0.39058
7656.9	3273.81	282.05	0.0546
7657	3109.58	281.95	-0.03652
7657.1	3064	281.85	-0.06151
7657.2	2576.3	281.75	-0.33595
7657.3	2616.48	281.65	-0.31362
7657.4	3467.98	281.55	0.16518
7657.5	3194.45	281.45	0.0104
7657.6	2976.22	281.35	-0.11332
7657.7	3442.75	281.25	0.14852
7657.8	3209.76	281.15	0.0167
7657.9	2976.81	281.05	-0.11481
7658	3106.92	280.95	-0.04153
7658.1	3385.69	280.85	0.11596
7658.2	2978.13	280.75	-0.11231
7658.3	2898.99	280.65	-0.15493
7658.4	3139.81	280.55	-0.01655
7658.5	2778.98	280.45	-0.2159
7658.6	2616.28	280.35	-0.30261
7658.7	3142.91	280.25	0
7658.8	2783.27	280.15	-0.19506
7658.9	2995.72	280.05	-0.06679
7659	2841.58	279.95	-0.14379
7659.1	2845.92	279.85	-0.13054
7659.2	2739.48	279.75	-0.17873
7659.3	2551.3	279.65	-0.27214
7659.4	2472.98	279.55	-0.30298
7659.5	3130.57	279.45	0.0811
7659.6	3268.15	279.35	0.17291
7659.7	3141.07	279.25	0.11612
7659.8	2718.87	279.15	-0.10654
7659.9	2749.93	279.05	-0.07383
7660	3133.37	278.95	0.15735
7660.1	2634.12	278.85	-0.10845
7660.2	2647.02	278.75	-0.08604
7660.3	3113.07	278.65	0.19125
7660.4	3063.91	278.55	0.17815
7660.5	3145.37	278.45	0.23814
7660.6	2989.39	278.35	0.16389
7660.7	3021.84	278.25	0.19508
7660.8	2949.46	278.15	0.16649
7660.9	2771.15	278.05	0.0774
7661	2619.23	277.95	0.00218
7661.1	2671.63	277.85	0.04093
7661.2	2613.53	277.75	0.01635
7661.3	2691.98	277.65	0.06756
7661.4	2947.69	277.55	0.21752
7661.5	2841.68	277.45	0.16282
7661.6	2654.38	277.35	0.06138
7661.7	2846.5	277.25	0.17262
7661.8	3154.32	277.15	0.34812
7661.9	3027.66	277.05	0.27815
7662	2917.37	276.95	0.21658
7662.1	3241.96	276.85	0.39907
7662.2	3195.21	276.75	0.37176
7662.3	2777.07	276.65	0.13465
7662.4	2731.33	276.55	0.10655
7662.5	3096.81	276.45	0.30935
7662.6	3253.69	276.35	0.39412
7662.7	3182.44	276.25	0.34991
7662.8	2813.65	276.15	0.13768
7662.9	2767.78	276.05	0.10679
7663	2580.87	275.95	-0.00393
7663.1	2924.8	275.85	0.18382
7663.2	2818.94	275.75	0.11799
7663.3	2898.57	275.65	0.15629
7663.4	2743.03	275.55	0.06191
7663.5	2861.34	275.45	0.12147
7663.6	3279.84	275.35	0.34985
7663.7	3171.15	275.25	0.28126
7663.8	2904.38	275.15	0.12356
7663.9	2786.32	275.05	0.0495
7664	2711.93	274.95	0

## Sheet: AB
This file contains the raw data (intensity as a function of kinetic energy) and the processed data (intensity as a function of binding energy, normalised when necessary), with each tab corresponding to a different material, arranged in the same order and labeled using the abbreviations listed in Table S1.
Supplementary Information for: X‑Ray Photoelectron Spectroscopy Analysis of Reference Compounds for Studying Rechargeable Li‑, Na‑, and K‑ion Batteries
C1s
Raw data		Processed data
Kinetic energy / eV	Intensity / a.u.	Binding energy / eV	Intensity / a.u.
7639	11428.1	300.05	0
7639.1	11158.1	299.95	-0.06023
7639.2	11654.3	299.85	0.06418
7639.3	11835.8	299.75	0.11279
7639.4	11337.5	299.65	-0.00239
7639.5	11771.8	299.55	0.10724
7639.6	12436.6	299.45	0.2725
7639.7	10661.7	299.35	-0.1501
7639.8	10034.5	299.25	-0.29601
7639.9	10666.3	299.15	-0.13837
7640	11517.9	299.05	0.07236
7640.1	11994.5	298.95	0.19287
7640.2	10526.4	298.85	-0.15511
7640.3	10663	298.75	-0.11619
7640.4	11317.3	298.65	0.0477
7640.5	11104.6	298.55	0.00286
7640.6	12205.3	298.45	0.27478
7640.7	11962.7	298.35	0.2232
7640.8	10636.4	298.25	-0.08929
7640.9	10433.8	298.15	-0.13071
7641	10218.9	298.05	-0.17478
7641.1	11123.9	297.95	0.05133
7641.2	10895.6	297.85	0.00464
7641.3	10857.8	297.75	0.0042
7641.4	10830.1	297.65	0.00656
7641.5	10764	297.55	0
7641.6	10755.3	297.45	0.00763
7641.7	11566.9	297.35	0.21307
7641.8	10539.8	297.25	-0.02472
7641.9	10327.4	297.15	-0.06654
7642	10596.8	297.05	0.00713
7642.1	11378	296.95	0.20331
7642.2	10817.3	296.85	0.07496
7642.3	11698.3	296.75	0.29271
7642.4	11965.6	296.65	0.36094
7642.5	11800.1	296.55	0.32303
7642.6	10959.2	296.45	0.12023
7642.7	11575.7	296.35	0.26631
7642.8	11470.7	296.25	0.23592
7642.9	12432.1	296.15	0.45969
7643	12278.8	296.05	0.41169
7643.1	12308.4	295.95	0.40447
7643.2	12006.8	295.85	0.3138
7643.3	12909.7	295.75	0.50959
7643.4	12237.3	295.65	0.32164
7643.5	11280.9	295.55	0.06089
7643.6	11613.4	295.45	0.10622
7643.7	12497.8	295.35	0.27988
7643.8	12780.3	295.25	0.30454
7643.9	12500.3	295.15	0.19049
7644	13429.8	295.05	0.36563
7644.1	14038	294.95	0.46189
7644.2	13550.2	294.85	0.2934
7644.3	13259.9	294.75	0.17269
7644.4	13602.7	294.65	0.20562
7644.5	13178.7	294.55	0.05564
7644.6	13633.9	294.45	0.12025
7644.7	13651	294.35	0.0825
7644.8	14071.2	294.25	0.14508
7644.9	14152.5	294.15	0.12901
7645	14334.4	294.05	0.1401
7645.1	15382.3	293.95	0.36272
7645.2	15664.3	293.85	0.40344
7645.3	14945.9	293.75	0.20561
7645.4	13520.9	293.65	-0.16005
7645.5	14364.7	293.55	0.02339
7645.6	13863.4	293.45	-0.11516
7645.7	14334.3	293.35	-0.0173
7645.8	16123.9	293.25	0.40031
7645.9	15992.1	293.15	0.35669
7646	15257.7	293.05	0.16957
7646.1	16286.5	292.95	0.40908
7646.2	16596.2	292.85	0.47691
7646.3	16484.8	292.75	0.44489
7646.4	15771.5	292.65	0.26938
7646.5	16753.1	292.55	0.50392
7646.6	17584.1	292.45	0.70369
7646.7	19274.8	292.35	1.11218
7646.8	19006.4	292.25	1.05001
7646.9	19375	292.15	1.14281
7647	20213.6	292.05	1.3503
7647.1	21119	291.95	1.57531
7647.2	21401.6	291.85	1.65159
7647.3	22149.4	291.75	1.84135
7647.4	22901.6	291.65	2.03347
7647.5	24074.1	291.55	2.3282
7647.6	24682.5	291.45	2.48826
7647.7	25818	291.35	2.77658
7647.8	25404.8	291.25	2.69287
7647.9	25413.1	291.15	2.71196
7648	27673.8	291.05	3.27504
7648.1	29235.3	290.95	3.67073
7648.2	26632.8	290.85	3.06403
7648.3	27173.8	290.75	3.21597
7648.4	27600.2	290.65	3.34137
7648.5	28816.7	290.55	3.6582
7648.6	27553.2	290.45	3.37836
7648.7	25686.1	290.35	2.95402
7648.8	24522.1	290.25	2.7001
7648.9	23218.8	290.15	2.41351
7649	21894.1	290.05	2.12267
7649.1	22118.6	289.95	2.20606
7649.2	22337.8	289.85	2.28901
7649.3	20813	289.75	1.95248
7649.4	19918.6	289.65	1.76867
7649.5	20877.4	289.55	2.03223
7649.6	20309.6	289.45	1.92862
7649.7	21092.2	289.35	2.15116
7649.8	19512.9	289.25	1.80517
7649.9	19969.8	289.15	1.95056
7650	21012.5	289.05	2.23776
7650.1	20610.1	288.95	2.17727
7650.2	20835.8	288.85	2.26877
7650.3	19849.6	288.75	2.06872
7650.4	18976.1	288.65	1.89637
7650.5	20391	288.55	2.276
7650.6	20567.6	288.45	2.3577
7650.7	21415.1	288.35	2.6015
7650.8	19877.7	288.25	2.27098
7650.9	21273.5	288.15	2.64773
7651	20955.7	288.05	2.61187
7651.1	21009.3	287.95	2.66585
7651.2	21768.3	287.85	2.89013
7651.3	22883.1	287.75	3.20046
7651.4	23471.1	287.65	3.38408
7651.5	22565.8	287.55	3.20803
7651.6	24069.3	287.45	3.61271
7651.7	25433.5	287.35	3.98399
7651.8	27704.6	287.25	4.57401
7651.9	28670.9	287.15	4.84967
7652	29481.8	287.05	5.08796
7652.1	31025.6	286.95	5.50297
7652.2	33760.8	286.85	6.20512
7652.3	34535.6	286.75	6.43486
7652.4	35423.8	286.65	6.69191
7652.5	35444.1	286.55	6.73973
7652.6	36333.7	286.45	6.99702
7652.7	39835.9	286.35	7.88383
7652.8	41811	286.25	8.40251
7652.9	42443.9	286.15	8.59756
7653	44169.2	286.05	9.05571
7653.1	47240.9	285.95	9.83813
7653.2	51521.8	285.85	10.9118
7653.3	50473	285.75	10.7007
7653.4	54242.6	285.65	11.6505
7653.5	63631.8	285.55	13.9544
7653.6	72168	285.45	16.0524
7653.7	82912.1	285.35	18.6821
7653.8	102120	285.25	23.3511
7653.9	132260	285.15	30.6546
7654	168444	285.05	39.414
7654.1	216587	284.95	51.0551
7654.2	261433	284.85	61.9013
7654.3	302733	284.75	71.8922
7654.4	328443	284.65	78.1254
7654.5	326063	284.55	77.5886
7654.6	291629	284.45	69.3257
7654.7	240156	284.35	56.956
7654.8	172469	284.25	40.6782
7654.9	120033	284.15	28.0751
7655	83395	284.05	19.2786
7655.1	56249.9	283.95	12.7692
7655.2	41352.2	283.85	9.21065
7655.3	31195.5	283.75	6.7939
7655.4	23456.6	283.65	4.959
7655.5	16631.5	283.55	3.34349
7655.6	12141.3	283.45	2.28981
7655.7	7496.55	283.35	1.19801
7655.8	5443.53	283.25	0.72988
7655.9	4113.03	283.15	0.43494
7656	3057.9	283.05	0.20538
7656.1	2361.62	282.95	0.0613
7656.2	2149.76	282.85	0.03295
7656.3	1988.88	282.75	0.01582
7656.4	1940.91	282.65	0.02482
7656.5	1773.09	282.55	0.00382
7656.6	1956.15	282.45	0.06626
7656.7	1804.63	282.35	0.0469
7656.8	1936.61	282.25	0.09468
7656.9	1704.45	282.15	0.05354
7657	1612.69	282.05	0.04515
7657.1	1574.88	281.95	0.04874
7657.2	1367.57	281.85	0.0105
7657.3	1545.22	281.75	0.06414
7657.4	1559.85	281.65	0.07765
7657.5	1230.75	281.55	0.00754
7657.6	1133.37	281.45	-0.00744
7657.7	1001.77	281.35	-0.03132
7657.8	954.557	281.25	-0.03545
7657.9	1062.51	281.15	-0.00271
7658	829.574	281.05	-0.05259
7658.1	1097.45	280.95	0.01782
7658.2	1197.64	280.85	0.04748
7658.3	978.875	280.75	0
7658.4	965.909	280.65	0.00189
7658.5	1006.87	280.55	0.01657
7658.6	942.272	280.45	0.00561
7658.7	1218.8	280.35	0.07665
7658.8	941.222	280.25	0.01395
7658.9	708.254	280.15	-0.03818
7659	675.645	280.05	-0.04222
7659.1	919.714	279.95	0.02023
7659.2	970.722	279.85	0.03597
7659.3	725.443	279.75	-0.01988
7659.4	952.746	279.65	0.03799
7659.5	864.236	279.55	0.01958
7659.6	722.71	279.45	-0.01177
7659.7	959.991	279.35	0.048
7659.8	788.344	279.25	0.00906
7659.9	901.307	279.15	0.03855
7660	883.008	279.05	0.03626
7660.1	889.347	278.95	0.03975
7660.2	852.278	278.85	0.03264
7660.3	1058.09	278.75	0.08392
7660.4	917.059	278.65	0.05147
7660.5	758.341	278.55	0.01462
7660.6	757.903	278.45	0.01579
7660.7	630.602	278.35	-0.01374
7660.8	815.637	278.25	0.03188
7660.9	986.514	278.15	0.07396
7661	813.249	278.05	0.033
7661.1	737.364	277.95	0.01538
7661.2	846.368	277.85	0.04222
7661.3	658.331	277.75	-0.00263
7661.4	585.706	277.65	-0.01977
7661.5	621.002	277.55	-0.011
7661.6	750.043	277.45	0.02027
7661.7	768.671	277.35	0.02484
7661.8	778.544	277.25	0.02722
7661.9	834.014	277.15	0.0405
7662	968.408	277.05	0.07273
7662.1	710.701	276.95	0.01038
7662.2	858.849	276.85	0.04577
7662.3	883.104	276.75	0.05124
7662.4	771.625	276.65	0.02393
7662.5	774.358	276.55	0.02409
7662.6	728.843	276.45	0.01257
7662.7	1071.91	276.35	0.09464
7662.8	916.914	276.25	0.05662
7662.9	913.556	276.15	0.05511
7663	910.909	276.05	0.05373
7663.1	848.97	275.95	0.03802
7663.2	958.593	275.85	0.06362
7663.3	919.637	275.75	0.05339
7663.4	998.762	275.65	0.07159
7663.5	988.948	275.55	0.06833
7663.6	1048.45	275.45	0.08176
7663.7	1034.1	275.35	0.07737
7663.8	843.373	275.25	0.03047
7663.9	789.008	275.15	0.01642
7664	724.808	275.05	0

[truncated: 27 more sheets: PVdF, PANa, SBR, CMC, LiF, LiFSA, LiTFSA, NaTFSA, KTFSA, LiPF2O2, NaPF6, Ti2O3, Li4Ti5O12, V2O3, VO2, V2O5, Cr2O3, MnO, Mn2O3, MnO2 …]
